# Supplementary material for: Using search trends to analyze web-based users’ behavior profiles connected with COVID-19 in mainland China: infodemiology study based on hot words and Baidu Index
Source: PeerJ. 2022 Nov 9;10:e14343. doi: 10.7717/peerj.14343 (PMC9653070; doi:10.7717/peerj.14343)
Supplement: Table S1 [file peerj-10-14343-s004.xlsx]

## Sheet: Home and sub pages of GISAID,WH
Home and sub pages of GISAID,WHO and NCBI databases.
GISAID	WHO	NCBI
https://www.gisaid.org/	https://www.who.int/	https://www.ncbi.nlm.nih.gov/sars-cov-2/
	https://covid19.who.int/	https://www.ncbi.nlm.nih.gov/pmc/about/covid-19/
	https://www.who.int/emergencies/diseases/novel-coronavirus-2019/interactive-timeline#!	https://www.ncbi.nlm.nih.gov/books?term=%22covid+19%22%5BResource+Type%5D&cmd=DetailsSearch
	https://covid19.who.int/measures

## Sheet: Home and sub pages of  CDC and 
Home and sub pages of CDC and CCDC.
CDC	CCDC
https://chinese.cdc.gov/coronavirus/2019-ncov/symptoms-testing/symptoms.html	https://www.chinacdc.cn/jkzt/crb/zl/szkb_11803/jszl_2275/202002/t20200228_213918.html
https://www.cdc.gov/coronavirus/2019-ncov/symptoms-testing/symptoms.html
