# Supplementary material for: Using search trends to analyze web-based users’ behavior profiles connected with COVID-19 in mainland China: infodemiology study based on hot words and Baidu Index
Source: PeerJ. 2022 Nov 9;10:e14343. doi: 10.7717/peerj.14343 (PMC9653070; doi:10.7717/peerj.14343)
Supplement: Table S2 [file peerj-10-14343-s005.xlsx]

## Sheet: Word frequencies based on Pytho
Word frequencies based on Python codes
Hot words	Top word frequencies based on Python codes > 5%	Hot words	Top word frequencies based on Python codes £ 5%
covid19	347	among	10
health	219	next	10
global	120	critical	10
response	100	comprehensive	10
directorgeneral	100	tests	10
countries	90	effects	10
pandemic	87	delivery	10
international	82	treatments	10
public	66	surveillance	10
issued	63	office	10
world	60	regulations	10
published	60	chinese	10
vaccines	58	team	10
vaccine	56	major	10
access	55	2005	10
first	55	confirmed	10
information	51	possible	10
data	50	needed	10
sars-cov-2	49	state	10
rapid	47	engagement	10
cases	46	considerations	10
coronavirus	42	spread	10
committee	42	prevent	10
preparedness	40	advance	10
china	40	continue	10
transmission	38	campaign	10
support	37	better	10
virus	37	fund	10
advice	37	trial	10
outbreak	36	context	10
report	35	hosted	10
use	35	former	10
whos	34	civil	10
more	33	sequences	9
work	32	one	9
emergency	32	tool	9
guidance	32	important	9
covax	32	providing	9
research	31	fight	9
care	31	essential	9
partners	31	our	9
including	30	continues	9
new	29	pmc	9
are	29	analysis	9
novel	29	shared	9
disease	29	make	9
evidence	29	internet	9
statement	29	longterm	9
states	28	monitoring	9
their	28	masks	9
other	28	innovation	9
also	28	develop	9
national	27	society	9
or	27	across	9
2021	27	levels	9
held	27	press	9
together	26	humantohuman	9
during	26	time	9
guideline	26	implement	9
about	26	worldwide	9
workers	26	concern	9
review	25	trials	9
republic	24	agreement	9
sharing	24	commitment	9
community	24	protective	9
impact	24	equipment	9
case	24	general	9
tools	23	actaccelerator	9
clinical	23	approach	8
regional	23	when	8
country	23	open	8
ensure	23	potential	8
leaders	23	digital	8
launched	23	point	8
influenza	22	detect	8
measures	22	been	8
member	22	latest	8
control	21	services	8
risk	21	identify	8
ihr	21	accelerate	8
wuhan	21	workshop	8
view	20	lessons	8
meeting	20	learned	8
development	20	children	8
commission	20	laboratory	8
director	20	mental	8
mission	19	home	8
announced	19	technical	8
solidarity	18	financing	8
action	18	pneumonia	8
peoples	18	epidemic	8
media	18	coordination	8
recommendations	18	deaths	8
experts	18	some	8
foundation	18	began	8
group	18	presented	8
initiative	17	following	8
key	17	launch	8
collaboration	17	increase	8
studies	17	marked	8
safety	17	low	8
prevention	17	into	8
patients	17	humanitarian	8
emergencies	17	reports	8
organization	17	covering	8
reported	17	early	8
briefing	17	any	8
vaccination	17	federation	8
european	16	societies	8
available	16	consultation	8
brief	16	decision	8
organizations	16	existing	8
medicines	16	within	8
interim	16	accepted	8
convened	16	individuals	8
independent	16	economic	8
security	15	immunization	8
scientific	15	economies	8
equitable	15	session	8
news	15	investment	8
further	15	unicef	8
there	15	viral	7
said	15	detailed	7
therapeutics	15	temporary	7
effective	14	do	7
programme	14	pandemics	7
related	14	outbreaks	7
network	14	could	7
efforts	14	understanding	7
management	14	resources	7
africa	14	pubmed	7
social	14	now	7
president	14	articles	7
resolution	14	dashboard	7
variants	13	address	7
variant	13	situation	7
treatment	13	them	7
summit	13	ongoing	7
provided	13	addition	7
authorities	13	many	7
provide	13	needs	7
developed	13	after	7
plan	13	planning	7
strategic	13	workshopin	7
updated	12	diagnostic	7
governments	12	healthcare	7
platform	12	recovery	7
event	12	responses	7
managing	12	leadership	7
alert	12	progress	7
executive	12	manufacturers	7
systems	12	out	7
supply	12	share	7
diagnostics	12	events	7
forum	12	americas	7
doses	12	include	7
additional	11	assessment	7
communities	11	still	7
future	11	outside	7
role	11	knowledge	7
testing	11	readiness	7
facility	11	days	7
science	11	while	7
conference	11	every	7
cluster	11	south	7
system	11	highlighted	7
region	11	where	7
safe	11	cross	7
prepare	11	crescent	7
protect	11	astrazeneca	7
medical	11	being	7
working	11	spoke	7
special	11	importance	7
infection	11	30	7
assembly	11	minister	7
		personal	7
		g20	7
		strengthen	7
		youth	7
		adopted	7
		products	7
		council	7
		phase	7
		panel	7
		evolution	6
		lead	6
		years	6
		building	6
		stakeholders	6
		having	6
		sequence	6
		supporting	6
		level	6
		respond	6
		mitigate	6
		build	6
		sra	6
		free	6
		guidelines	6
		genome	6
		reference	6
		explore	6
		sequencing	6
		laboratories	6
		facilitate	6
		find	6
		contain	6
		technologies	6
		issues	6
		population	6
		strategies	6
		expert	6
		14	6
		what	6
		severe	6
		illness	6
		ng188	6
		settings	6
		chronic	6
		investigations	6
		topics	6
		release	6
		year	6
		15	6
		us	6
		several	6
		activities	6
		three	6
		tweeted	6
		reduce	6
		acute	6
		infections	6
		number	6
		source	6
		second	6
		received	6
		continued	6
		findings	6
		recommended	6
		operational	6
		multiple	6
		lifesaving	6
		highlighting	6
		study	6
		joined	6
		included	6
		released	6
		online	6
		groups	6
		origins	6
		considered	6
		did	6
		strategy	6
		candidates	6
		welcomed	6
		scale	6
		test	6
		different	6
		agreed	6
		whether	6
		update	6
		committees	6
		focus	6
		four	6
		globally	6
		funding	6
		dr	6
		sustainable	6
		treat	6
		constitute	6
		prime	6
		policy	6
		subcommittee	6
		oxygen	6
		gisaids	5
		private	5
		contribution	5
		mechanism	5
		if	5
		landmark	5
		nature	5
		established	5
		provides	5
		promote	5
		partner	5
		guide	5
		reviews	5
		gene	5
		queries	5
		focused	5
		human	5
		patient	5
		publishers	5
		accessible	5
		date	5
		terms	5
		meet	5
		modelling	5
		framework	5
		mortality	5
		virtual	5
		equity	5
		scientists	5
		covid	5
		service	5
		drugs	5
		animal	5
		crisis	5
		epidemics	5
		stock	5
		contact	5
		cause	5
		request	5
		informed	5
		goarn	5
		identified	5
		respiratory	5
		addressed	5
		limited	5
		clear	5
		travel	5
		implementation	5
		accurate	5
		receive	5
		keep	5
		beijing	5
		practices	5
		survey	5
		food	5
		university	5
		results	5
		those	5
		covered	5
		outlined	5
		both	5
		visit	5
		five	5
		coalition	5
		rd	5
		participants	5
		priorities	5
		areas	5
		aims	5
		committed	5
		enough	5
		took	5
		place	5
		hydroxychloroquine	5
		course	5
		efficacy	5
		populations	5
		outlining	5
		declared	5
		highlevel	5
		via	5
		urgent	5
		supplies	5
		cohosted	5
		parties	5
		commitments	5
		package	5
		virtually	5
		distribution	5
		vulnerable	5
		actions	5
		evaluation	5
		agency	5
		ifrc	5
		finalised	5
		light	5
		sage	5
		gacvs	5
		india	5
		lineages	4
		genetic	4
		become	4
		definitions	4
		numbers	4
		initiatives	4
		registered	4
		germany	4
		america	4
		ready	4
		bringing	4
		political	4
		viruses	4
		anniversary	4
		worlds	4
		unprecedented	4
		protecting	4
		immediate	4
		model	4
		collaborative	4
		pathogens	4
		partnership	4
		back	4
		implementing	4
		epidemiology	4
		literature	4
		clinicaltrialsgov	4
		content	4
		2019	4
		annotation	4
		download	4
		record	4
		blast	4
		technology	4
		coronavirusrelated	4
		opportunity	4
		series	4
		women	4
		societal	4
		conditions	4
		immune	4
		learning	4
		interventions	4
		infectious	4
		basis	4
		arts	4
		learn	4
		europe	4
		western	4
		pacific	4
		policies	4
		procurement	4
		unknown	4
		advised	4
		imported	4
		stated	4
		experience	4
		investigation	4
		understand	4
		full	4
		france	4
		briefings	4
		whochina	4
		detection	4
		reporting	4
		users	4
		since	4
		overview	4
		stop	4
		offered	4
		nations	4
		conducted	4
		themselves	4
		immunity	4
		middleincome	4
		universal	4
		started	4
		led	4
		refugee	4
		uk	4
		order	4
		field	4
		went	4
		awareness	4
		best	4
		avoid	4
		gaps	4
		line	4
		robust	4
		designed	4
		effectiveness	4
		criteria	4
		discuss	4
		emerging	4
		quality	4
		constituted	4
		urged	4
		local	4
		senior	4
		government	4
		ecs	4
		secretariat	4
		wholeofgovernment	4
		professor	4
		secretarygeneral	4
		speaking	4
		sector	4
		maintaining	4
		fully	4
		protection	4
		missions	4
		heads	4
		calls	4
		introduction	4
		secure	4
		equitably	4
		market	4
		pillar	4
		norway	4
		gpmb	4
		nearly	4
		noted	4
		rollout	4
		regulatory	4
		materials	4
		institute	4
		functioning	4
		ioac	4
		prioritize	4
		communication	4
		sprp	4
		johnson	4
		database	3
		nomenclature	3
		takes	3
		widespread	3
		researchers	3
		updates	3
		changes	3
		arm	3
		nonprofit	3
		congratulations	3
		successful	3
		ensuring	3
		history	3
		similar	3
		ever	3
		unique	3
		mechanisms	3
		strain	3
		greatest	3
		guarantee	3
		principles	3
		chinas	3
		core	3
		serve	3
		built	3
		success	3
		big	3
		age	3
		initial	3
		lives	3
		past	3
		central	3
		behalf	3
		image	3
		runs	3
		nucleotide	3
		records	3
		fulltext	3
		text	3
		mining	3
		secondary	3
		regarding	3
		refseq	3
		search	3
		interactive	3
		list	3
		pubchem	3
		used	3
		cdc	3
		summary	3
		portal	3
		publications	3
		see	3
		right	3
		same	3
		details	3
		scope	3
		own	3
		suggested	3
		specific	3
		evidencebased	3
		largescale	3
		workforce	3
		sciences	3
		allocation	3
		schools	3
		value	3
		facilities	3
		physical	3
		preparing	3
		death	3
		vitamin	3
		disorders	3
		planned	3
		hospitals	3
		affecting	3
		institutions	3
		addressing	3
		misinformation	3
		using	3
		inform	3
		daily	3
		timeline	3
		resourcing	3
		healing	3
		asked	3
		notified	3
		requested	3
		offering	3
		agencies	3
		officials	3
		underway	3
		preliminary	3
		common	3
		asymptomatic	3
		labour	3
		very	3
		least	3
		usa	3
		saying	3
		weekly	3
		warned	3
		stressed	3
		must	3
		tracing	3
		andor	3
		african	3
		step	3
		languages	3
		chatbot	3
		app	3
		directly	3
		infodemiology	3
		overabundance	3
		showing	3
		either	3
		critically	3
		tobacco	3
		worker	3
		wholed	3
		plans	3
		zoonotic	3
		edition	3
		law	3
		lab	3
		standards	3
		frontline	3
		responding	3
		giving	3
		disruption	3
		demand	3
		increasing	3
		tuberculosis	3
		total	3
		high	3
		burden	3
		even	3
		kingdom	3
		rapidly	3
		migration	3
		samples	3
		travellers	3
		listening	3
		realtime	3
		organized	3
		psychosocial	3
		toolkit	3
		cochaired	3
		features	3
		measure	3
		blood	3
		cure	3
		scenarios	3
		innovations	3
		cepi	3
		outcomes	3
		determined	3
		caused	3
		beginning	3
		teleconference	3
		expected	3
		soon	3
		prioritization	3
		candidate	3
		individual	3
		joining	3
		assess	3
		epidemiological	3
		roadmap	3
		randomized	3
		overcome	3
		small	3
		speed	3
		developing	3
		stages	3
		brought	3
		structured	3
		set	3
		discussed	3
		concluded	3
		establish	3
		center	3
		only	3
		advise	3
		reconvened	3
		american	3
		isolate	3
		jinping	3
		severity	3
		leading	3
		administration	3
		japan	3
		solutions	3
		companies	3
		requests	3
		advocacy	3
		change	3
		industry	3
		manufacturing	3
		emphasising	3
		challenge	3
		clusters	3
		face	3
		extraordinary	3
		along	3
		especially	3
		close	3
		inclusive	3
		ursula	3
		von	3
		der	3
		leyen	3
		production	3
		coordinate	3
		closing	3
		inequalities	3
		initiate	3
		improve	3
		capacity	3
		treaty	3
		ctap	3
		voluntary	3
		proposed	3
		representing	3
		interest	3
		accelerators	3
		forward	3
		mask	3
		regular	3
		gavi	3
		achieving	3
		gender	3
		accountability	3
		cochairs	3
		towards	3
		mitigating	3
		steps	3
		programmes	3
		half	3
		participating	3
		goods	3
		investments	3
		privacy	3
		peace	3
		going	3
		oversight	3
		front	3
		includes	3
		astrazenecaoxford	3
		listing	3
		healthy	3
		signing	3
		suspected	3
		pillars	3
		points	3
		gatherings	3
		operations	3
		facing	3
		religious	3
		antigen	3
		influenzalike	3
		chain	3
		shipped	3
		korea	3
		donors	3
		serum	3
		epicov	2
		pango	2
		track	2
		circulating	2
		occur	2
		singapore	2
		corporate	2
		philanthropy	2
		decade	2
		innovative	2
		players	2
		significant	2
		catastrophic	2
		recorded	2
		prepared	2
		achieved	2
		collaborate	2
		combat	2
		example	2
		acknowledges	2
		timely	2
		trust	2
		threat	2
		cooperation	2
		enabling	2
		thanks	2
		trusted	2
		upon	2
		champion	2
		seasonal	2
		exceeded	2
		ideas	2
		reality	2
		fill	2
		advanced	2
		issue	2
		encourages	2
		collection	2
		offer	2
		quick	2
		navigation	2
		submission	2
		websites	2
		submit	2
		scientist	2
		read	2
		growing	2
		litcovid	2
		curated	2
		bookshelf	2
		display	2
		run	2
		protein	2
		datasets	2
		get	2
		registry	2
		aws	2
		structure	2
		compounds	2
		pathways	2
		geo	2
		dbgap	2
		gtr	2
		resource	2
		electron	2
		micrograph	2
		particles	2
		niaid	2
		advisors	2
		immediately	2
		appropriate	2
		journals	2
		way	2
		journal	2
		relating	2
		your	2
		done	2
		above	2
		nlm	2
		chief	2
		publicly	2
		practice	2
		assessing	2
		wake	2
		careers	2
		academic	2
		briefs	2
		tackling	2
		family	2
		impacts	2
		present	2
		black	2
		education	2
		relevant	2
		approaches	2
		uptake	2
		adherence	2
		systemic	2
		anticancer	2
		radiotherapy	2
		airborne	2
		inflammatory	2
		transplantation	2
		arranging	2
		assays	2
		treated	2
		young	2
		factors	2
		communitybased	2
		enterprise	2
		thrombocytopenia	2
		regions	2
		info	2
		taken	2
		measles	2
		amidst	2
		symposium	2
		views	2
		commit	2
		cop26	2
		climate	2
		episode	2
		publication	2
		diabetes	2
		eastern	2
		mediterranean	2
		southeast	2
		asia	2
		questions	2
		picked	2
		municipal	2
		intelligence	2
		sources	2
		diseases	2
		seeking	2
		activated	2
		headquarters	2
		ngos	2
		precautions	2
		apply	2
		ministry	2
		ascertain	2
		presence	2
		modes	2
		symptomatic	2
		japanese	2
		person	2
		travelled	2
		detected	2
		likely	2
		whowpro	2
		strengthened	2
		monitor	2
		trends	2
		ability	2
		holding	2
		main	2
		much	2
		highquality	2
		activate	2
		highest	2
		followed	2
		earlier	2
		egypt	2
		rest	2
		instant	2
		viber	2
		messaging	2
		notifications	2
		less	2
		month	2
		assistance	2
		infodemics	2
		occurring	2
		disruptions	2
		departed	2
		identifying	2
		hosts	2
		animals	2
		humans	2
		hunger	2
		laws	2
		rights	2
		hepatitis	2
		college	2
		london	2
		hbv	2
		2030	2
		refugees	2
		ebola	2
		nurses	2
		explained	2
		almost	2
		disrupted	2
		expanded	2
		expand	2
		minkassociated	2
		denmark	2
		danish	2
		malaria	2
		estimated	2
		coverage	2
		range	2
		throughout	2
		spending	2
		referred	2
		announcement	2
		spreading	2
		provinces	2
		named	2
		migrants	2
		aparttogether	2
		consortium	2
		indicated	2
		story	2
		pilot	2
		ears	2
		decisionmakers	2
		happening	2
		rising	2
		bloomberg	2
		philanthropies	2
		lack	2
		agenda	2
		standardized	2
		easily	2
		understood	2
		associated	2
		initially	2
		studying	2
		city	2
		infodemic	2
		feature	2
		times	2
		live	2
		conduct	2
		selected	2
		period	2
		signals	2
		union	2
		rare	2
		benefits	2
		risks	2
		vaccinations	2
		game	2
		plague	2
		inc	2
		investigated	2
		approximately	2
		continents	2
		beyond	2
		sick	2
		blueprint	2
		hazards	2
		rtpcr	2
		informal	2
		agents	2
		stigma	2
		therefore	2
		attended	2
		funders	2
		came	2
		priority	2
		natural	2
		diagnosis	2
		ethical	2
		outlines	2
		goals	2
		generate	2
		design	2
		process	2
		strong	2
		determine	2
		showed	2
		large	2
		start	2
		examine	2
		discussion	2
		lopinavirritonavir	2
		described	2
		remdesivir	2
		effect	2
		hospitalized	2
		ways	2
		optimize	2
		generation	2
		regulators	2
		screening	2
		given	2
		suffering	2
		head	2
		advising	2
		able	2
		reach	2
		recommendation	2
		deliberations	2
		members	2
		equally	2
		intermediate	2
		warning	2
		formulated	2
		pan	2
		paho	2
		infected	2
		detecting	2
		arrived	2
		containment	2
		conducting	2
		biological	2
		return	2
		budget	2
		pbac	2
		deeply	2
		relatively	2
		discussions	2
		gave	2
		behind	2
		window	2
		often	2
		munich	2
		bilateral	2
		meetings	2
		expressed	2
		appointed	2
		broader	2
		supported	2
		alarming	2
		wholeofsociety	2
		save	2
		clearly	2
		trace	2
		mobilize	2
		fifa	2
		message	2
		footballers	2
		coughing	2
		distance	2
		chaired	2
		mandate	2
		coordinating	2
		quickly	2
		contribute	2
		forefront	2
		bill	2
		melinda	2
		gates	2
		third	2
		membership	2
		bring	2
		participated	2
		sessions	2
		good	2
		fair	2
		heavy	2
		wider	2
		required	2
		route	2
		reiterated	2
		finance	2
		emphasis	2
		investing	2
		humanity	2
		signed	2
		aim	2
		town	2
		hall	2
		costa	2
		rica	2
		webinar	2
		engage	2
		lowerincome	2
		unanimously	2
		put	2
		enhancing	2
		driven	2
		involving	2
		wide	2
		documents	2
		focusing	2
		alliance	2
		controlled	2
		dialogue	2
		cyril	2
		ramaphosa	2
		erna	2
		solberg	2
		ministers	2
		sustained	2
		advocate	2
		affordable	2
		body	2
		current	2
		responsible	2
		governance	2
		bank	2
		chair	2
		generations	2
		violence	2
		64	2
		eligible	2
		offline	2
		livelihoods	2
		tens	2
		millions	2
		citizens	2
		improving	2
		resumed	2
		purpose	2
		strengthening	2
		capacities	2
		repository	2
		swiss	2
		noting	2
		consequences	2
		hands	2
		wearing	2
		windows	2
		emphasised	2
		months	2
		socioeconomic	2
		invest	2
		expanding	2
		collective	2
		suppress	2
		coordinated	2
		advisor	2
		accelerating	2
		deals	2
		maintain	2
		tanzania	2
		tackle	2
		symptoms	2
		ambassador	2
		ncds	2
		comes	2
		pharmacopoeias	2
		allowing	2
		citizen	2
		broad	2
		faith	2
		iom	2
		move	2
		saw	2
		commodity	2
		openwho	2
		sent	2
		teams	2
		mass	2
		shortages	2
		type	2
		quarantine	2
		consolidated	2
		practical	2
		balance	2
		collapse	2
		manage	2
		product	2
		professionals	2
		falsified	2
		presymptomatic	2
		before	2
		document	2
		adjusting	2
		movement	2
		academy	2
		magic	2
		causes	2
		validation	2
		pfizerbiontech	2
		frail	2
		elderly	2
		suggest	2
		characteristics	2
		training	2
		post	2
		hospital	2
		profile	2
		benefitrisk	2
		remained	2
		listed	2
		janssen	2
		clots	2
		platelets	2
		thencurrent	2
		relationship	2
		pscn	2
		created	2
		spain	2
		organised	2
		carrying	2
		ippr	2
		evaluate	2
		evaluations	2
		beirut	2
		lebanon	2
		injured	2
		massive	2
		necessary	2
		term	2
		exercise	2
		alongside	2
		covaxs	2
		employs	1
		assign	1
		phylogenetic	1
		clades	1
		rambaut	1
		granular	1
		classify	1
		describe	1
		markers	1
		emerge	1
		lineage	1
		allow	1
		separately	1
		permit	1
		finegrained	1
		picture	1
		genomes	1
		undergo	1
		reclassification	1
		fluctuations	1
		tallies	1
		overinterpretation	1
		avoided	1
		involves	1
		publicprivatepartnerships	1
		administrative	1
		freunde	1
		association	1
		federal	1
		official	1
		host	1
		ten	1
		commemorating	1
		centenary	1
		reassuring	1
		know	1
		emerges	1
		threatens	1
		collaborations	1
		confidence	1
		engendered	1
		added	1
		capabilities	1
		effectively	1
		substantially	1
		microbe	1
		mankind	1
		survive	1
		excellent	1
		ifpma	1
		greater	1
		element	1
		tenth	1
		represents	1
		perhaps	1
		everything	1
		stands	1
		cuttingedge	1
		couldnt	1
		trustworthy	1
		forever	1
		transformed	1
		2013	1
		h7n9	1
		avian	1
		exemplary	1
		enshrined	1
		shining	1
		beacon	1
		hope	1
		recognized	1
		leader	1
		brilliant	1
		performance	1
		threats	1
		highly	1
		timetested	1
		families	1
		successfully	1
		ethos	1
		70year	1
		old	1
		complement	1
		extend	1
		reagents	1
		enhance	1
		imperative	1
		expectations	1
		publicprivate	1
		10th	1
		look	1
		inspiration	1
		headline	1
		editorial	1
		puts	1
		succinctly	1
		saves	1
		ecdc	1
		congratulates	1
		advocating	1
		plays	1
		increases	1
		annual	1
		seasons	1
		greatly	1
		contributing	1
		effort	1
		congratulate	1
		tenyear	1
		invaluable	1
		fostering	1
		eids	1
		increased	1
		dissemination	1
		improves	1
		complex	1
		dynamic	1
		last	1
		sequencerelated	1
		extracting	1
		dna	1
		add	1
		assembled	1
		raw	1
		archive	1
		referencing	1
		preprints	1
		suitable	1
		nc045512	1
		graphical	1
		betacoronavirus	1
		retrieve	1
		analyze	1
		hub	1
		query	1
		ids	1
		genbank	1
		accession	1
		dataset	1
		amazon	1
		web	1
		nextgeneration	1
		coronaviridae	1
		familycontaining	1
		selector	1
		structures	1
		domains	1
		substances	1
		bioassays	1
		expression	1
		specialized	1
		topic	1
		searches	1
		openaccess	1
		computational	1
		nihodss	1
		emblebi	1
		sites	1
		ddbj	1
		isolated	1
		captured	1
		colorenhanced	1
		integrated	1
		irf	1
		fort	1
		detrick	1
		maryland	1
		dozen	1
		voluntarily	1
		repositories	1
		collaborators	1
		responded	1
		volunteered	1
		formats	1
		license	1
		faq	1
		publisher	1
		eligibility	1
		covid19related	1
		append	1
		custom	1
		accessfilter	1
		author	1
		manuscriptfilter	1
		currently	1
		collections	1
		customization	1
		righthand	1
		bar	1
		appreciates	1
		publishing	1
		complete	1
		whostp	1
		dataresearch	1
		hypothetical	1
		routine	1
		residential	1
		homes	1
		costeffectiveness	1
		morbidity	1
		disasters	1
		stemm	1
		engineering	1
		medicine	1
		reopening	1
		k12	1
		prioritizing	1
		drug	1
		hesitancy	1
		decarcerating	1
		correctional	1
		advancing	1
		womens	1
		empowerment	1
		genomic	1
		infrastructure	1
		modernizing	1
		authorizations	1
		euas	1
		physicians	1
		engineers	1
		consultations	1
		2020april	1
		professions	1
		feasible	1
		acceptance	1
		distancing	1
		reducing	1
		venous	1
		thromboembolism	1
		sact	1
		cancer	1
		supplementation	1
		prevalence	1
		dialysis	1
		referral	1
		rheumatological	1
		autoimmune	1
		metabolic	1
		bone	1
		haematopoietic	1
		stem	1
		cell	1
		renal	1
		interstitial	1
		lung	1
		dermatological	1
		kidney	1
		immunocompromised	1
		organisation	1
		asthma	1
		gastrointestinal	1
		liver	1
		adaptation	1
		obstructive	1
		pulmonary	1
		copd	1
		cystic	1
		fibrosis	1
		literacy	1
		syndemic	1
		theory	1
		lens	1
		resilient	1
		toward	1
		postpandemic	1
		resilience	1
		seriesin	1
		substance	1
		era	1
		color	1
		tables	1
		vaccineinduced	1
		thrombosis	1
		vitt	1
		pivotal	1
		interfaces	1
		environmental	1
		newsroom	1
		here	1
		links	1
		scam	1
		dashboardmap	1
		showcasing	1
		threatened	1
		unwritten	1
		roll	1
		2022	1
		climatesmart	1
		poisoning	1
		watch	1
		speeches	1
		evidencetopolicy	1
		montreux	1
		fiscal	1
		space	1
		financial	1
		cyber	1
		ethics	1
		permissions	1
		licensing	1
		library	1
		frequently	1
		website	1
		focal	1
		translation	1
		eios	1
		promed	1
		contacted	1
		atypical	1
		incident	1
		imst	1
		ensures	1
		representative	1
		wrote	1
		repeating	1
		sister	1
		hubei	1
		province	1
		notice	1
		webbased	1
		contained	1
		status	1
		authoritys	1
		thailand	1
		labconfirmed	1
		existed	1
		certainly	1
		found	1
		exposure	1
		mildly	1
		undetected	1
		welfare	1
		considering	1
		patterns	1
		according	1
		extent	1
		whom	1
		euro	1
		arab	1
		emirates	1
		affirmed	1
		insights	1
		yet	1
		mindset	1
		materially	1
		employed	1
		nearterm	1
		embrace	1
		nonpharmaceutical	1
		isolation	1
		monitoringquarantining	1
		uninfected	1
		protocols	1
		allofgovernment	1
		allofsociety	1
		dependent	1
		fast	1
		decisionmaking	1
		top	1
		thoroughness	1
		ships	1
		voyage	1
		confirmation	1
		algeria	1
		continent	1
		epicentre	1
		combined	1
		apart	1
		offers	1
		whatsapp	1
		rakuten	1
		subscribers	1
		tenfold	1
		facebook	1
		messenger	1
		version	1
		multilingual	1
		briefed	1
		mis	1
		disinformation	1
		seventythree	1
		stockouts	1
		antiretroviral	1
		arv	1
		result	1
		twentyfour	1
		arvs	1
		quitting	1
		nicotine	1
		replacement	1
		therapy	1
		florence	1
		artificial	1
		dispels	1
		myths	1
		helps	1
		personalized	1
		quit	1
		counterparts	1
		objective	1
		jumped	1
		uns	1
		nutrition	1
		forecasted	1
		tip	1
		georgetown	1
		implemented	1
		goal	1
		wellbeing	1
		adhering	1
		imperial	1
		looked	1
		worst	1
		scenario	1
		projected	1
		born	1
		hbvrelated	1
		later	1
		pay	1
		tribute	1
		reallifeheroes	1
		playing	1
		roles	1
		stepping	1
		doctors	1
		video	1
		podcast	1
		featuring	1
		explanations	1
		audiences	1
		others	1
		concept	1
		herd	1
		whereby	1
		protected	1
		threshold	1
		reached	1
		indicative	1
		experienced	1
		difficulties	1
		halted	1
		releases	1
		reductions	1
		remote	1
		wikimedia	1
		administers	1
		wikipedia	1
		publics	1
		reliable	1
		subsaharan	1
		week	1
		launching	1
		changed	1
		voc	1
		psa	1
		youtube	1
		remind	1
		viewers	1
		endofyear	1
		holiday	1
		season	1
		because	1
		n501y	1
		mutation	1
		antónio	1
		vitorino	1
		releasing	1
		ghent	1
		copenhagen	1
		reduced	1
		migrant	1
		housing	1
		clothing	1
		heightened	1
		perceptions	1
		discrimination	1
		vui	1
		without	1
		precedent	1
		tell	1
		infographics	1
		stories	1
		partnerships	1
		speeding	1
		wholegenome	1
		brazil	1
		aisupported	1
		aipowered	1
		publicaccess	1
		narratives	1
		forums	1
		proactively	1
		voids	1
		saturate	1
		conversations	1
		responds	1
		concerns	1
		score	1
		struggle	1
		near	1
		swiftly	1
		limits	1
		TRUE	1
		undermining	1
		position	1
		paper	1
		proof	1
		papers	1
		living	1
		older	1
		adults	1
		interagency	1
		standing	1
		iasc	1
		mhpss	1
		stratification	1
		sex	1
		fatality	1
		ratios	1
		hospitalization	1
		visible	1
		analyses	1
		temporarily	1
		suspending	1
		precautionary	1
		coagulation	1
		persons	1
		outweighed	1
		simulation	1
		transports	1
		gained	1
		commentary	1
		comparing	1
		decisions	1
		gamers	1
		reallife	1
		ndemic	1
		creations	1
		wunderman	1
		thompson	1
		melbourne	1
		pollfish	1
		collaborated	1
		gen	1
		millennials	1
		respondents	1
		aged	1
		topline	1
		seen	1
		shareworthy	1
		FALSE	1
		apathy	1
		worries	1
		getting	1
		teleconferences	1
		networks	1
		allows	1
		activation	1
		stagih	1
		publishes	1
		protocol	1
		assay	1
		diagnose	1
		therapeutic	1
		name	1
		chosen	1
		inaccuracy	1
		refer	1
		geographical	1
		location	1
		fundamental	1
		principle	1
		underpinning	1
		origin	1
		characterization	1
		integration	1
		nine	1
		longerterm	1
		normally	1
		enrolling	1
		single	1
		comparison	1
		unproven	1
		arrangement	1
		generating	1
		relative	1
		draft	1
		landscape	1
		systematic	1
		passports	1
		antibodymediated	1
		accuracy	1
		passport	1
		riskfree	1
		certificate	1
		certificates	1
		multisystem	1
		syndrome	1
		adolescents	1
		temporally	1
		dexamethasone	1
		corticosteroid	1
		ill	1
		off	1
		geneva	1
		midfebruary	1
		steroids	1
		stopped	1
		discovery	1
		hospitalised	1
		monitored	1
		mutations	1
		composed	1
		bioinformatics	1
		vivo	1
		vitro	1
		evolving	1
		antivirals	1
		immunomodulatory	1
		antithrombotic	1
		combination	1
		therapies	1
		multi	1
		adaptive	1
		various	1
		arms	1
		discontinued	1
		spreads	1
		droplet	1
		fomite	1
		fecaloral	1
		bloodborne	1
		mothertochild	1
		animaltohuman	1
		conclusive	1
		repurposed	1
		interferon	1
		regimens	1
		appeared	1
		little	1
		28day	1
		inhospital	1
		recently	1
		thematic	1
		mathematical	1
		evolutionary	1
		biology	1
		models	1
		observational	1
		administering	1
		target	1
		schedules	1
		platforms	1
		whohosted	1
		400	1
		trained	1
		dogs	1
		lancet	1
		eclinicalmedicine	1
		severely	1
		newborns	1
		resulting	1
		unnecessary	1
		comprised	1
		charged	1
		conclusion	1
		again	1
		divided	1
		restrictive	1
		binary	1
		divergence	1
		doing	1
		receiving	1
		travelers	1
		ambassadors	1
		oas	1
		washington	1
		delegation	1
		cities	1
		transmissibility	1
		continuing	1
		material	1
		overall	1
		exchange	1
		switzerland	1
		30th	1
		reconvening	1
		reconvene	1
		concerning	1
		larger	1
		though	1
		exercises	1
		outreach	1
		formal	1
		alarm	1
		viet	1
		nam	1
		reasoning	1
		declare	1
		taking	1
		question	1
		shed	1
		unit	1
		roundtable	1
		silicon	1
		valley	1
		dedicated	1
		speech	1
		intensify	1
		adopt	1
		guided	1
		urgency	1
		envoys	1
		parts	1
		maha	1
		rabbat	1
		david	1
		nabarro	1
		adviser	1
		john	1
		nkengasong	1
		centres	1
		mirta	1
		roses	1
[truncated: 680 more rows]
