# Supplementary material for: Using search trends to analyze web-based users’ behavior profiles connected with COVID-19 in mainland China: infodemiology study based on hot words and Baidu Index
Source: PeerJ. 2022 Nov 9;10:e14343. doi: 10.7717/peerj.14343 (PMC9653070; doi:10.7717/peerj.14343)
Supplement: Table S5 [file peerj-10-14343-s008.xlsx]

## Sheet:  GDCV of subordinate hot words
The GDCV of subordinate hot words
Domains	Subordinate hot words	Serial numbers of provincial administrative regions										Sum	P values
S	Fatigue	29.9642	29.7133	29.5435	29.6861	29.717	29.6744	31	29.6028	29.6248	29.5424	298.068	0.0001
CR	Covid-19	29.9642	29.5435	29.7133	29.6028	29.6861	29.6744	29.717	29.6248	31	29.6046	298.131	0.0001
CR	SARS-CoV-2+	29.9642	29.5435	29.7133	29.6861	29.6248	29.6744	29.717	29.6028	29.6046	29.4468	296.577	0.0001
CR	Coronavirus	29.5435	29.7133	29.9642	29.6028	29.6744	29.6861	29.4468	29.717	29.6248	29.9115	296.884	0.0001
CR	Variant	29.9642	29.5435	29.7133	29.6028	29.6744	29.6861	29.717	29.6248	31	29.5424	298.068	0.0001
CR	Infection+	29.9642	29.7133	29.6028	29.6861	29.5435	29.6248	29.717	29.9115	31	29.6744	298.438	0.0001
T	Global	NA	NA	NA	NA	NA	NA	NA	NA	NA	NA	NA	0.0001
T	World	NA	NA	NA	NA	NA	NA	NA	NA	NA	NA	NA	0.0001
T	European	NA	NA	NA	NA	NA	NA	NA	NA	NA	NA	NA	0.0001
T	USA	NA	NA	NA	NA	NA	NA	NA	NA	NA	NA	NA	0.0001
T	China	NA	NA	NA	NA	NA	NA	NA	NA	NA	NA	NA	0.0001
T	Wuhan	NA	NA	NA	NA	NA	NA	NA	NA	NA	NA	NA	0.0001
PH	Vaccine+	29.9642	29.7133	29.6028	29.6861	29.5435	29.9115	29.717	29.6744	29.6248	31	298.438	0.0001
PH	Outbreak	29.7133	29.9642	29.6861	29.5435	29.6028	29.6744	29.717	29.6248	31	29.5424	298.068	0.0001
PH	Emergency+	29.9642	29.7133	29.5435	29.6861	29.6028	29.717	29.6248	29.6744	31	29.5424	298.068	0.0001
PH	Disease	29.9642	29.7133	29.5435	29.717	29.6861	29.6028	29.6744	29.6248	29.5424	31	298.068	0.0001
PH	Patient+	29.9642	29.5435	29.7133	29.6028	29.717	29.6744	29.6861	29.6248	29.4468	31	297.973	0.0001
PH	Clinical	29.9642	29.7133	29.5435	29.6861	29.6028	29.717	29.6248	29.6744	29.9115	31	298.438	0.0001
PH	Protect+	29.6744	29.5435	29.717	29.9642	29.7133	29.5424	29.6861	29.6248	29.6028	29.6396	296.708	0.0001
PH	Provide+	29.6861	29.7133	29.5435	29.9642	29.6028	29.717	29.6744	29.6248	31	29.5424	298.068	0.0001
PH	Testing	29.9642	29.7133	29.6861	29.5435	29.6028	29.717	29.6744	29.5424	29.6248	29.9115	296.98	0.0001
G	Government+	29.9642	29.7133	29.5435	29.6028	29.6861	29.717	29.6248	29.6744	31	29.5424	298.068	0.0001
G	Studies+	29.9642	29.7133	29.5435	29.6861	29.717	29.6744	29.6248	29.6028	31	29.5424	298.068	0.0001
G	Expert	29.9642	29.7133	29.5435	29.6861	29.717	29.6028	29.6248	29.6744	29.5424	31	298.068	0.0001
G	Measure+	29.9642	29.7133	29.5435	29.6861	29.6744	29.717	29.6028	29.6248	29.5424	29.9115	296.98	0.0001
G	Response	29.9642	29.7133	29.5435	29.6861	29.6028	29.717	29.6744	29.6248	31	29.9115	298.438	0.0001
G	Support	29.9642	29.7133	29.5435	29.717	29.6861	29.6028	29.6248	29.6744	31	29.5424	298.068	0.0001
G	Organization+	29.9642	29.6028	29.7133	29.5435	29.6861	29.717	29.6248	29.9115	29.6744	31	298.438	0.0001
G	Commission	29.9642	29.717	29.5435	29.7133	29.6861	29.0483	29.6744	29.6028	29.6248	31	297.574	0.0001
G	Assembly	29.9642	29.6028	29.7133	29.5435	29.6861	29.9115	29.6248	29.717	29.6744	29.6396	297.077	0.0001
G	Foundation	29.6028	29.9642	29.7133	29.6861	29.9115	29.5435	29.717	29.6248	29.6744	31	298.438	0.0001
M	Report	29.6028	29.9642	29.7133	29.6861	29.5435	29.9115	29.6046	29.717	29.4468	31	298.19	0.0001
