# Supplementary material for: Using search trends to analyze web-based users’ behavior profiles connected with COVID-19 in mainland China: infodemiology study based on hot words and Baidu Index
Source: PeerJ. 2022 Nov 9;10:e14343. doi: 10.7717/peerj.14343 (PMC9653070; doi:10.7717/peerj.14343)
Supplement: Table S6 [file peerj-10-14343-s009.xlsx]

## Sheet: The predictions of provinces
The predictions of provinces where the COVID-19 outbreak may occur
31	29.9642	29.9115	29.7874	29.724	29.717	29.7133	29.6861	29.6744	28.8568
31	29.9642	29.9115	29.7874	29.724	29.717	29.7133	29.6861	29.6744	28.7557
31	29.9642	29.9115	29.7874	29.724	29.717	29.7133	29.6861	29.6396	28.9243
31	29.9642	29.9115	29.7874	29.724	29.717	29.7133	29.6861	29.6396	28.8568
31	29.9642	29.9115	29.7874	29.724	29.717	29.7133	29.6861	29.6396	28.7557
31	29.9642	29.9115	29.7874	29.724	29.717	29.7133	29.6861	29.6248	28.9243
31	29.9642	29.9115	29.7874	29.724	29.717	29.7133	29.6861	29.6248	28.8568
31	29.9642	29.9115	29.7874	29.724	29.717	29.7133	29.6861	29.6248	28.7557
31	29.9642	29.9115	29.7874	29.724	29.717	29.7133	29.6861	29.6046	28.9243
31	29.9642	29.9115	29.7874	29.724	29.717	29.7133	29.6861	29.6046	28.8568
31	29.9642	29.9115	29.7874	29.724	29.717	29.7133	29.6861	29.6046	28.7557
31	29.9642	29.9115	29.7874	29.724	29.717	29.7133	29.6861	29.6028	28.9243
31	29.9642	29.9115	29.7874	29.724	29.717	29.7133	29.6861	29.6028	28.8568
31	29.9642	29.9115	29.7874	29.724	29.717	29.7133	29.6861	29.6028	28.7557
31	29.9642	29.9115	29.7874	29.724	29.717	29.7133	29.6861	29.5435	28.9243
31	29.9642	29.9115	29.7874	29.724	29.717	29.7133	29.6861	29.5435	28.8568
31	29.9642	29.9115	29.7874	29.724	29.717	29.7133	29.6861	29.5435	28.7557
31	29.9642	29.9115	29.7874	29.724	29.717	29.7133	29.6861	29.5424	28.9243
31	29.9642	29.9115	29.7874	29.724	29.717	29.7133	29.6861	29.5424	28.8568
31	29.9642	29.9115	29.7874	29.724	29.717	29.7133	29.6861	29.5424	28.7557
31	29.9642	29.9115	29.7874	29.724	29.717	29.7133	29.6861	29.5326	29.0483
31	29.9642	29.9115	29.7874	29.724	29.717	29.7133	29.6861	29.5326	28.9243
31	29.9642	29.9115	29.7874	29.724	29.717	29.7133	29.6861	29.5326	28.8568
31	29.9642	29.9115	29.7874	29.724	29.717	29.7133	29.6861	29.5326	28.7557
31	29.9642	29.9115	29.7874	29.724	29.717	29.7133	29.6861	29.5243	29.0483
31	29.9642	29.9115	29.7874	29.724	29.717	29.7133	29.6861	29.5243	28.9243
31	29.9642	29.9115	29.7874	29.724	29.717	29.7133	29.6861	29.5243	28.8568
31	29.9642	29.9115	29.7874	29.724	29.717	29.7133	29.6861	29.5243	28.7557
31	29.9642	29.9115	29.7874	29.724	29.717	29.7133	29.6861	29.4468	29.0483
31	29.9642	29.9115	29.7874	29.724	29.717	29.7133	29.6861	29.4468	28.9243
31	29.9642	29.9115	29.7874	29.724	29.717	29.7133	29.6861	29.4468	28.8568
31	29.9642	29.9115	29.7874	29.724	29.717	29.7133	29.6861	29.4468	28.7557
31	29.9642	29.9115	29.7874	29.724	29.717	29.7133	29.6861	29.4122	29.1472
31	29.9642	29.9115	29.7874	29.724	29.717	29.7133	29.6861	29.4122	29.0483
31	29.9642	29.9115	29.7874	29.724	29.717	29.7133	29.6861	29.4122	28.9243
31	29.9642	29.9115	29.7874	29.724	29.717	29.7133	29.6861	29.4122	28.8568
31	29.9642	29.9115	29.7874	29.724	29.717	29.7133	29.6861	29.4122	28.7557
31	29.9642	29.9115	29.7874	29.724	29.717	29.7133	29.6861	29.3639	29.1852
31	29.9642	29.9115	29.7874	29.724	29.717	29.7133	29.6861	29.3639	29.1472
31	29.9642	29.9115	29.7874	29.724	29.717	29.7133	29.6861	29.3639	29.0483
31	29.9642	29.9115	29.7874	29.724	29.717	29.7133	29.6861	29.3639	28.9243
31	29.9642	29.9115	29.7874	29.724	29.717	29.7133	29.6861	29.3639	28.8568
31	29.9642	29.9115	29.7874	29.724	29.717	29.7133	29.6861	29.3591	29.1852
31	29.9642	29.9115	29.7874	29.724	29.717	29.7133	29.6861	29.3591	29.1472
31	29.9642	29.9115	29.7874	29.724	29.717	29.7133	29.6861	29.3591	29.0483
31	29.9642	29.9115	29.7874	29.724	29.717	29.7133	29.6861	29.3591	28.9243
31	29.9642	29.9115	29.7874	29.724	29.717	29.7133	29.6861	29.3591	28.8568
31	29.9642	29.9115	29.7874	29.724	29.717	29.7133	29.6861	29.3418	29.1852
31	29.9642	29.9115	29.7874	29.724	29.717	29.7133	29.6861	29.3418	29.1472
31	29.9642	29.9115	29.7874	29.724	29.717	29.7133	29.6861	29.3418	29.0483
31	29.9642	29.9115	29.7874	29.724	29.717	29.7133	29.6861	29.3418	28.9243
31	29.9642	29.9115	29.7874	29.724	29.717	29.7133	29.6861	29.3418	28.8568
31	29.9642	29.9115	29.7874	29.724	29.717	29.7133	29.6861	29.306	29.1852
31	29.9642	29.9115	29.7874	29.724	29.717	29.7133	29.6861	29.306	29.1472
31	29.9642	29.9115	29.7874	29.724	29.717	29.7133	29.6861	29.306	29.0483
31	29.9642	29.9115	29.7874	29.724	29.717	29.7133	29.6861	29.306	28.9243
31	29.9642	29.9115	29.7874	29.724	29.717	29.7133	29.6861	29.306	28.8568
31	29.9642	29.9115	29.7874	29.724	29.717	29.7133	29.6861	29.1852	29.1472
31	29.9642	29.9115	29.7874	29.724	29.717	29.7133	29.6861	29.1852	29.0483
31	29.9642	29.9115	29.7874	29.724	29.717	29.7133	29.6861	29.1472	29.0483
31	29.9642	29.9115	29.7874	29.724	29.717	29.7133	29.6744	29.6396	28.9243
31	29.9642	29.9115	29.7874	29.724	29.717	29.7133	29.6744	29.6396	28.8568
31	29.9642	29.9115	29.7874	29.724	29.717	29.7133	29.6744	29.6396	28.7557
31	29.9642	29.9115	29.7874	29.724	29.717	29.7133	29.6744	29.6248	28.9243
31	29.9642	29.9115	29.7874	29.724	29.717	29.7133	29.6744	29.6248	28.8568
31	29.9642	29.9115	29.7874	29.724	29.717	29.7133	29.6744	29.6248	28.7557
31	29.9642	29.9115	29.7874	29.724	29.717	29.7133	29.6744	29.6046	28.9243
31	29.9642	29.9115	29.7874	29.724	29.717	29.7133	29.6744	29.6046	28.8568
31	29.9642	29.9115	29.7874	29.724	29.717	29.7133	29.6744	29.6046	28.7557
31	29.9642	29.9115	29.7874	29.724	29.717	29.7133	29.6744	29.6028	28.9243
31	29.9642	29.9115	29.7874	29.724	29.717	29.7133	29.6744	29.6028	28.8568
31	29.9642	29.9115	29.7874	29.724	29.717	29.7133	29.6744	29.6028	28.7557
31	29.9642	29.9115	29.7874	29.724	29.717	29.7133	29.6744	29.5435	29.0483
31	29.9642	29.9115	29.7874	29.724	29.717	29.7133	29.6744	29.5435	28.9243
31	29.9642	29.9115	29.7874	29.724	29.717	29.7133	29.6744	29.5435	28.8568
31	29.9642	29.9115	29.7874	29.724	29.717	29.7133	29.6744	29.5435	28.7557
31	29.9642	29.9115	29.7874	29.724	29.717	29.7133	29.6744	29.5424	29.0483
31	29.9642	29.9115	29.7874	29.724	29.717	29.7133	29.6744	29.5424	28.9243
31	29.9642	29.9115	29.7874	29.724	29.717	29.7133	29.6744	29.5424	28.8568
31	29.9642	29.9115	29.7874	29.724	29.717	29.7133	29.6744	29.5424	28.7557
31	29.9642	29.9115	29.7874	29.724	29.717	29.7133	29.6744	29.5326	29.0483
31	29.9642	29.9115	29.7874	29.724	29.717	29.7133	29.6744	29.5326	28.9243
31	29.9642	29.9115	29.7874	29.724	29.717	29.7133	29.6744	29.5326	28.8568
31	29.9642	29.9115	29.7874	29.724	29.717	29.7133	29.6744	29.5326	28.7557
31	29.9642	29.9115	29.7874	29.724	29.717	29.7133	29.6744	29.5243	29.0483
31	29.9642	29.9115	29.7874	29.724	29.717	29.7133	29.6744	29.5243	28.9243
31	29.9642	29.9115	29.7874	29.724	29.717	29.7133	29.6744	29.5243	28.8568
31	29.9642	29.9115	29.7874	29.724	29.717	29.7133	29.6744	29.5243	28.7557
31	29.9642	29.9115	29.7874	29.724	29.717	29.7133	29.6744	29.4468	29.1472
31	29.9642	29.9115	29.7874	29.724	29.717	29.7133	29.6744	29.4468	29.0483
31	29.9642	29.9115	29.7874	29.724	29.717	29.7133	29.6744	29.4468	28.9243
31	29.9642	29.9115	29.7874	29.724	29.717	29.7133	29.6744	29.4468	28.8568
31	29.9642	29.9115	29.7874	29.724	29.717	29.7133	29.6744	29.4468	28.7557
31	29.9642	29.9115	29.7874	29.724	29.717	29.7133	29.6744	29.4122	29.1472
31	29.9642	29.9115	29.7874	29.724	29.717	29.7133	29.6744	29.4122	29.0483
31	29.9642	29.9115	29.7874	29.724	29.717	29.7133	29.6744	29.4122	28.9243
31	29.9642	29.9115	29.7874	29.724	29.717	29.7133	29.6744	29.4122	28.8568
31	29.9642	29.9115	29.7874	29.724	29.717	29.7133	29.6744	29.4122	28.7557
31	29.9642	29.9115	29.7874	29.724	29.717	29.7133	29.6744	29.3639	29.1852
31	29.9642	29.9115	29.7874	29.724	29.717	29.7133	29.6744	29.3639	29.1472
31	29.9642	29.9115	29.7874	29.724	29.717	29.7133	29.6744	29.3639	29.0483
31	29.9642	29.9115	29.7874	29.724	29.717	29.7133	29.6744	29.3639	28.9243
31	29.9642	29.9115	29.7874	29.724	29.717	29.7133	29.6744	29.3639	28.8568
31	29.9642	29.9115	29.7874	29.724	29.717	29.7133	29.6744	29.3591	29.1852
31	29.9642	29.9115	29.7874	29.724	29.717	29.7133	29.6744	29.3591	29.1472
31	29.9642	29.9115	29.7874	29.724	29.717	29.7133	29.6744	29.3591	29.0483
31	29.9642	29.9115	29.7874	29.724	29.717	29.7133	29.6744	29.3591	28.9243
31	29.9642	29.9115	29.7874	29.724	29.717	29.7133	29.6744	29.3591	28.8568
31	29.9642	29.9115	29.7874	29.724	29.717	29.7133	29.6744	29.3418	29.1852
31	29.9642	29.9115	29.7874	29.724	29.717	29.7133	29.6744	29.3418	29.1472
31	29.9642	29.9115	29.7874	29.724	29.717	29.7133	29.6744	29.3418	29.0483
31	29.9642	29.9115	29.7874	29.724	29.717	29.7133	29.6744	29.3418	28.9243
31	29.9642	29.9115	29.7874	29.724	29.717	29.7133	29.6744	29.3418	28.8568
31	29.9642	29.9115	29.7874	29.724	29.717	29.7133	29.6744	29.306	29.1852
31	29.9642	29.9115	29.7874	29.724	29.717	29.7133	29.6744	29.306	29.1472
31	29.9642	29.9115	29.7874	29.724	29.717	29.7133	29.6744	29.306	29.0483
31	29.9642	29.9115	29.7874	29.724	29.717	29.7133	29.6744	29.306	28.9243
31	29.9642	29.9115	29.7874	29.724	29.717	29.7133	29.6744	29.306	28.8568
31	29.9642	29.9115	29.7874	29.724	29.717	29.7133	29.6744	29.1852	29.1472
31	29.9642	29.9115	29.7874	29.724	29.717	29.7133	29.6744	29.1852	29.0483
31	29.9642	29.9115	29.7874	29.724	29.717	29.7133	29.6744	29.1472	29.0483
31	29.9642	29.9115	29.7874	29.724	29.717	29.7133	29.6396	29.6248	28.9243
31	29.9642	29.9115	29.7874	29.724	29.717	29.7133	29.6396	29.6248	28.8568
31	29.9642	29.9115	29.7874	29.724	29.717	29.7133	29.6396	29.6248	28.7557
31	29.9642	29.9115	29.7874	29.724	29.717	29.7133	29.6396	29.6046	28.9243
31	29.9642	29.9115	29.7874	29.724	29.717	29.7133	29.6396	29.6046	28.8568
31	29.9642	29.9115	29.7874	29.724	29.717	29.7133	29.6396	29.6046	28.7557
31	29.9642	29.9115	29.7874	29.724	29.717	29.7133	29.6396	29.6028	28.9243
31	29.9642	29.9115	29.7874	29.724	29.717	29.7133	29.6396	29.6028	28.8568
31	29.9642	29.9115	29.7874	29.724	29.717	29.7133	29.6396	29.6028	28.7557
31	29.9642	29.9115	29.7874	29.724	29.717	29.7133	29.6396	29.5435	29.0483
31	29.9642	29.9115	29.7874	29.724	29.717	29.7133	29.6396	29.5435	28.9243
31	29.9642	29.9115	29.7874	29.724	29.717	29.7133	29.6396	29.5435	28.8568
31	29.9642	29.9115	29.7874	29.724	29.717	29.7133	29.6396	29.5435	28.7557
31	29.9642	29.9115	29.7874	29.724	29.717	29.7133	29.6396	29.5424	29.0483
31	29.9642	29.9115	29.7874	29.724	29.717	29.7133	29.6396	29.5424	28.9243
31	29.9642	29.9115	29.7874	29.724	29.717	29.7133	29.6396	29.5424	28.8568
31	29.9642	29.9115	29.7874	29.724	29.717	29.7133	29.6396	29.5424	28.7557
31	29.9642	29.9115	29.7874	29.724	29.717	29.7133	29.6396	29.5326	29.0483
31	29.9642	29.9115	29.7874	29.724	29.717	29.7133	29.6396	29.5326	28.9243
31	29.9642	29.9115	29.7874	29.724	29.717	29.7133	29.6396	29.5326	28.8568
31	29.9642	29.9115	29.7874	29.724	29.717	29.7133	29.6396	29.5326	28.7557
31	29.9642	29.9115	29.7874	29.724	29.717	29.7133	29.6396	29.5243	29.0483
31	29.9642	29.9115	29.7874	29.724	29.717	29.7133	29.6396	29.5243	28.9243
31	29.9642	29.9115	29.7874	29.724	29.717	29.7133	29.6396	29.5243	28.8568
31	29.9642	29.9115	29.7874	29.724	29.717	29.7133	29.6396	29.5243	28.7557
31	29.9642	29.9115	29.7874	29.724	29.717	29.7133	29.6396	29.4468	29.1472
31	29.9642	29.9115	29.7874	29.724	29.717	29.7133	29.6396	29.4468	29.0483
31	29.9642	29.9115	29.7874	29.724	29.717	29.7133	29.6396	29.4468	28.9243
31	29.9642	29.9115	29.7874	29.724	29.717	29.7133	29.6396	29.4468	28.8568
31	29.9642	29.9115	29.7874	29.724	29.717	29.7133	29.6396	29.4468	28.7557
31	29.9642	29.9115	29.7874	29.724	29.717	29.7133	29.6396	29.4122	29.1852
31	29.9642	29.9115	29.7874	29.724	29.717	29.7133	29.6396	29.4122	29.1472
31	29.9642	29.9115	29.7874	29.724	29.717	29.7133	29.6396	29.4122	29.0483
31	29.9642	29.9115	29.7874	29.724	29.717	29.7133	29.6396	29.4122	28.9243
31	29.9642	29.9115	29.7874	29.724	29.717	29.7133	29.6396	29.4122	28.8568
31	29.9642	29.9115	29.7874	29.724	29.717	29.7133	29.6396	29.3639	29.1852
31	29.9642	29.9115	29.7874	29.724	29.717	29.7133	29.6396	29.3639	29.1472
31	29.9642	29.9115	29.7874	29.724	29.717	29.7133	29.6396	29.3639	29.0483
31	29.9642	29.9115	29.7874	29.724	29.717	29.7133	29.6396	29.3639	28.9243
31	29.9642	29.9115	29.7874	29.724	29.717	29.7133	29.6396	29.3639	28.8568
31	29.9642	29.9115	29.7874	29.724	29.717	29.7133	29.6396	29.3591	29.1852
31	29.9642	29.9115	29.7874	29.724	29.717	29.7133	29.6396	29.3591	29.1472
31	29.9642	29.9115	29.7874	29.724	29.717	29.7133	29.6396	29.3591	29.0483
31	29.9642	29.9115	29.7874	29.724	29.717	29.7133	29.6396	29.3591	28.9243
31	29.9642	29.9115	29.7874	29.724	29.717	29.7133	29.6396	29.3591	28.8568
31	29.9642	29.9115	29.7874	29.724	29.717	29.7133	29.6396	29.3418	29.1852
31	29.9642	29.9115	29.7874	29.724	29.717	29.7133	29.6396	29.3418	29.1472
31	29.9642	29.9115	29.7874	29.724	29.717	29.7133	29.6396	29.3418	29.0483
31	29.9642	29.9115	29.7874	29.724	29.717	29.7133	29.6396	29.3418	28.9243
31	29.9642	29.9115	29.7874	29.724	29.717	29.7133	29.6396	29.3418	28.8568
31	29.9642	29.9115	29.7874	29.724	29.717	29.7133	29.6396	29.306	29.1852
31	29.9642	29.9115	29.7874	29.724	29.717	29.7133	29.6396	29.306	29.1472
31	29.9642	29.9115	29.7874	29.724	29.717	29.7133	29.6396	29.306	29.0483
31	29.9642	29.9115	29.7874	29.724	29.717	29.7133	29.6396	29.306	28.9243
31	29.9642	29.9115	29.7874	29.724	29.717	29.7133	29.6396	29.1852	29.1472
31	29.9642	29.9115	29.7874	29.724	29.717	29.7133	29.6396	29.1852	29.0483
31	29.9642	29.9115	29.7874	29.724	29.717	29.7133	29.6396	29.1472	29.0483
31	29.9642	29.9115	29.7874	29.724	29.717	29.7133	29.6248	29.6046	28.9243
31	29.9642	29.9115	29.7874	29.724	29.717	29.7133	29.6248	29.6046	28.8568
31	29.9642	29.9115	29.7874	29.724	29.717	29.7133	29.6248	29.6046	28.7557
31	29.9642	29.9115	29.7874	29.724	29.717	29.7133	29.6248	29.6028	28.9243
31	29.9642	29.9115	29.7874	29.724	29.717	29.7133	29.6248	29.6028	28.8568
31	29.9642	29.9115	29.7874	29.724	29.717	29.7133	29.6248	29.6028	28.7557
31	29.9642	29.9115	29.7874	29.724	29.717	29.7133	29.6248	29.5435	29.0483
31	29.9642	29.9115	29.7874	29.724	29.717	29.7133	29.6248	29.5435	28.9243
31	29.9642	29.9115	29.7874	29.724	29.717	29.7133	29.6248	29.5435	28.8568
31	29.9642	29.9115	29.7874	29.724	29.717	29.7133	29.6248	29.5435	28.7557
31	29.9642	29.9115	29.7874	29.724	29.717	29.7133	29.6248	29.5424	29.0483
31	29.9642	29.9115	29.7874	29.724	29.717	29.7133	29.6248	29.5424	28.9243
31	29.9642	29.9115	29.7874	29.724	29.717	29.7133	29.6248	29.5424	28.8568
31	29.9642	29.9115	29.7874	29.724	29.717	29.7133	29.6248	29.5424	28.7557
31	29.9642	29.9115	29.7874	29.724	29.717	29.7133	29.6248	29.5326	29.0483
31	29.9642	29.9115	29.7874	29.724	29.717	29.7133	29.6248	29.5326	28.9243
31	29.9642	29.9115	29.7874	29.724	29.717	29.7133	29.6248	29.5326	28.8568
31	29.9642	29.9115	29.7874	29.724	29.717	29.7133	29.6248	29.5326	28.7557
31	29.9642	29.9115	29.7874	29.724	29.717	29.7133	29.6248	29.5243	29.0483
31	29.9642	29.9115	29.7874	29.724	29.717	29.7133	29.6248	29.5243	28.9243
31	29.9642	29.9115	29.7874	29.724	29.717	29.7133	29.6248	29.5243	28.8568
31	29.9642	29.9115	29.7874	29.724	29.717	29.7133	29.6248	29.5243	28.7557
31	29.9642	29.9115	29.7874	29.724	29.717	29.7133	29.6248	29.4468	29.1852
31	29.9642	29.9115	29.7874	29.724	29.717	29.7133	29.6248	29.4468	29.1472
31	29.9642	29.9115	29.7874	29.724	29.717	29.7133	29.6248	29.4468	29.0483
31	29.9642	29.9115	29.7874	29.724	29.717	29.7133	29.6248	29.4468	28.9243
31	29.9642	29.9115	29.7874	29.724	29.717	29.7133	29.6248	29.4468	28.8568
31	29.9642	29.9115	29.7874	29.724	29.717	29.7133	29.6248	29.4122	29.1852
31	29.9642	29.9115	29.7874	29.724	29.717	29.7133	29.6248	29.4122	29.1472
31	29.9642	29.9115	29.7874	29.724	29.717	29.7133	29.6248	29.4122	29.0483
31	29.9642	29.9115	29.7874	29.724	29.717	29.7133	29.6248	29.4122	28.9243
31	29.9642	29.9115	29.7874	29.724	29.717	29.7133	29.6248	29.4122	28.8568
31	29.9642	29.9115	29.7874	29.724	29.717	29.7133	29.6248	29.3639	29.1852
31	29.9642	29.9115	29.7874	29.724	29.717	29.7133	29.6248	29.3639	29.1472
31	29.9642	29.9115	29.7874	29.724	29.717	29.7133	29.6248	29.3639	29.0483
31	29.9642	29.9115	29.7874	29.724	29.717	29.7133	29.6248	29.3639	28.9243
31	29.9642	29.9115	29.7874	29.724	29.717	29.7133	29.6248	29.3639	28.8568
31	29.9642	29.9115	29.7874	29.724	29.717	29.7133	29.6248	29.3591	29.1852
31	29.9642	29.9115	29.7874	29.724	29.717	29.7133	29.6248	29.3591	29.1472
31	29.9642	29.9115	29.7874	29.724	29.717	29.7133	29.6248	29.3591	29.0483
31	29.9642	29.9115	29.7874	29.724	29.717	29.7133	29.6248	29.3591	28.9243
31	29.9642	29.9115	29.7874	29.724	29.717	29.7133	29.6248	29.3591	28.8568
31	29.9642	29.9115	29.7874	29.724	29.717	29.7133	29.6248	29.3418	29.1852
31	29.9642	29.9115	29.7874	29.724	29.717	29.7133	29.6248	29.3418	29.1472
31	29.9642	29.9115	29.7874	29.724	29.717	29.7133	29.6248	29.3418	29.0483
31	29.9642	29.9115	29.7874	29.724	29.717	29.7133	29.6248	29.3418	28.9243
31	29.9642	29.9115	29.7874	29.724	29.717	29.7133	29.6248	29.306	29.1852
31	29.9642	29.9115	29.7874	29.724	29.717	29.7133	29.6248	29.306	29.1472
31	29.9642	29.9115	29.7874	29.724	29.717	29.7133	29.6248	29.306	29.0483
31	29.9642	29.9115	29.7874	29.724	29.717	29.7133	29.6248	29.306	28.9243
31	29.9642	29.9115	29.7874	29.724	29.717	29.7133	29.6248	29.1852	29.1472
31	29.9642	29.9115	29.7874	29.724	29.717	29.7133	29.6248	29.1852	29.0483
31	29.9642	29.9115	29.7874	29.724	29.717	29.7133	29.6046	29.6028	29.0483
31	29.9642	29.9115	29.7874	29.724	29.717	29.7133	29.6046	29.6028	28.9243
31	29.9642	29.9115	29.7874	29.724	29.717	29.7133	29.6046	29.6028	28.8568
31	29.9642	29.9115	29.7874	29.724	29.717	29.7133	29.6046	29.6028	28.7557
31	29.9642	29.9115	29.7874	29.724	29.717	29.7133	29.6046	29.5435	29.0483
31	29.9642	29.9115	29.7874	29.724	29.717	29.7133	29.6046	29.5435	28.9243
31	29.9642	29.9115	29.7874	29.724	29.717	29.7133	29.6046	29.5435	28.8568
31	29.9642	29.9115	29.7874	29.724	29.717	29.7133	29.6046	29.5435	28.7557
31	29.9642	29.9115	29.7874	29.724	29.717	29.7133	29.6046	29.5424	29.0483
31	29.9642	29.9115	29.7874	29.724	29.717	29.7133	29.6046	29.5424	28.9243
31	29.9642	29.9115	29.7874	29.724	29.717	29.7133	29.6046	29.5424	28.8568
31	29.9642	29.9115	29.7874	29.724	29.717	29.7133	29.6046	29.5424	28.7557
31	29.9642	29.9115	29.7874	29.724	29.717	29.7133	29.6046	29.5326	29.0483
31	29.9642	29.9115	29.7874	29.724	29.717	29.7133	29.6046	29.5326	28.9243
31	29.9642	29.9115	29.7874	29.724	29.717	29.7133	29.6046	29.5326	28.8568
31	29.9642	29.9115	29.7874	29.724	29.717	29.7133	29.6046	29.5326	28.7557
31	29.9642	29.9115	29.7874	29.724	29.717	29.7133	29.6046	29.5243	29.0483
31	29.9642	29.9115	29.7874	29.724	29.717	29.7133	29.6046	29.5243	28.9243
31	29.9642	29.9115	29.7874	29.724	29.717	29.7133	29.6046	29.5243	28.8568
31	29.9642	29.9115	29.7874	29.724	29.717	29.7133	29.6046	29.5243	28.7557
31	29.9642	29.9115	29.7874	29.724	29.717	29.7133	29.6046	29.4468	29.1852
31	29.9642	29.9115	29.7874	29.724	29.717	29.7133	29.6046	29.4468	29.1472
31	29.9642	29.9115	29.7874	29.724	29.717	29.7133	29.6046	29.4468	29.0483
31	29.9642	29.9115	29.7874	29.724	29.717	29.7133	29.6046	29.4468	28.9243
31	29.9642	29.9115	29.7874	29.724	29.717	29.7133	29.6046	29.4468	28.8568
31	29.9642	29.9115	29.7874	29.724	29.717	29.7133	29.6046	29.4122	29.1852
31	29.9642	29.9115	29.7874	29.724	29.717	29.7133	29.6046	29.4122	29.1472
31	29.9642	29.9115	29.7874	29.724	29.717	29.7133	29.6046	29.4122	29.0483
31	29.9642	29.9115	29.7874	29.724	29.717	29.7133	29.6046	29.4122	28.9243
31	29.9642	29.9115	29.7874	29.724	29.717	29.7133	29.6046	29.4122	28.8568
31	29.9642	29.9115	29.7874	29.724	29.717	29.7133	29.6046	29.3639	29.1852
31	29.9642	29.9115	29.7874	29.724	29.717	29.7133	29.6046	29.3639	29.1472
31	29.9642	29.9115	29.7874	29.724	29.717	29.7133	29.6046	29.3639	29.0483
31	29.9642	29.9115	29.7874	29.724	29.717	29.7133	29.6046	29.3639	28.9243
31	29.9642	29.9115	29.7874	29.724	29.717	29.7133	29.6046	29.3591	29.306
31	29.9642	29.9115	29.7874	29.724	29.717	29.7133	29.6046	29.3591	29.1852
31	29.9642	29.9115	29.7874	29.724	29.717	29.7133	29.6046	29.3591	29.1472
31	29.9642	29.9115	29.7874	29.724	29.717	29.7133	29.6046	29.3591	29.0483
31	29.9642	29.9115	29.7874	29.724	29.717	29.7133	29.6046	29.3591	28.9243
31	29.9642	29.9115	29.7874	29.724	29.717	29.7133	29.6046	29.3418	29.306
31	29.9642	29.9115	29.7874	29.724	29.717	29.7133	29.6046	29.3418	29.1852
31	29.9642	29.9115	29.7874	29.724	29.717	29.7133	29.6046	29.3418	29.1472
31	29.9642	29.9115	29.7874	29.724	29.717	29.7133	29.6046	29.3418	29.0483
31	29.9642	29.9115	29.7874	29.724	29.717	29.7133	29.6046	29.3418	28.9243
31	29.9642	29.9115	29.7874	29.724	29.717	29.7133	29.6046	29.306	29.1852
31	29.9642	29.9115	29.7874	29.724	29.717	29.7133	29.6046	29.306	29.1472
31	29.9642	29.9115	29.7874	29.724	29.717	29.7133	29.6046	29.306	29.0483
31	29.9642	29.9115	29.7874	29.724	29.717	29.7133	29.6046	29.306	28.9243
31	29.9642	29.9115	29.7874	29.724	29.717	29.7133	29.6046	29.1852	29.1472
31	29.9642	29.9115	29.7874	29.724	29.717	29.7133	29.6046	29.1852	29.0483
31	29.9642	29.9115	29.7874	29.724	29.717	29.7133	29.6028	29.5435	29.0483
31	29.9642	29.9115	29.7874	29.724	29.717	29.7133	29.6028	29.5435	28.9243
31	29.9642	29.9115	29.7874	29.724	29.717	29.7133	29.6028	29.5435	28.8568
31	29.9642	29.9115	29.7874	29.724	29.717	29.7133	29.6028	29.5435	28.7557
31	29.9642	29.9115	29.7874	29.724	29.717	29.7133	29.6028	29.5424	29.0483
31	29.9642	29.9115	29.7874	29.724	29.717	29.7133	29.6028	29.5424	28.9243
31	29.9642	29.9115	29.7874	29.724	29.717	29.7133	29.6028	29.5424	28.8568
31	29.9642	29.9115	29.7874	29.724	29.717	29.7133	29.6028	29.5424	28.7557
31	29.9642	29.9115	29.7874	29.724	29.717	29.7133	29.6028	29.5326	29.0483
31	29.9642	29.9115	29.7874	29.724	29.717	29.7133	29.6028	29.5326	28.9243
31	29.9642	29.9115	29.7874	29.724	29.717	29.7133	29.6028	29.5326	28.8568
31	29.9642	29.9115	29.7874	29.724	29.717	29.7133	29.6028	29.5326	28.7557
31	29.9642	29.9115	29.7874	29.724	29.717	29.7133	29.6028	29.5243	29.0483
31	29.9642	29.9115	29.7874	29.724	29.717	29.7133	29.6028	29.5243	28.9243
31	29.9642	29.9115	29.7874	29.724	29.717	29.7133	29.6028	29.5243	28.8568
31	29.9642	29.9115	29.7874	29.724	29.717	29.7133	29.6028	29.5243	28.7557
31	29.9642	29.9115	29.7874	29.724	29.717	29.7133	29.6028	29.4468	29.1852
31	29.9642	29.9115	29.7874	29.724	29.717	29.7133	29.6028	29.4468	29.1472
31	29.9642	29.9115	29.7874	29.724	29.717	29.7133	29.6028	29.4468	29.0483
31	29.9642	29.9115	29.7874	29.724	29.717	29.7133	29.6028	29.4468	28.9243
31	29.9642	29.9115	29.7874	29.724	29.717	29.7133	29.6028	29.4468	28.8568
31	29.9642	29.9115	29.7874	29.724	29.717	29.7133	29.6028	29.4122	29.1852
31	29.9642	29.9115	29.7874	29.724	29.717	29.7133	29.6028	29.4122	29.1472
31	29.9642	29.9115	29.7874	29.724	29.717	29.7133	29.6028	29.4122	29.0483
31	29.9642	29.9115	29.7874	29.724	29.717	29.7133	29.6028	29.4122	28.9243
31	29.9642	29.9115	29.7874	29.724	29.717	29.7133	29.6028	29.4122	28.8568
31	29.9642	29.9115	29.7874	29.724	29.717	29.7133	29.6028	29.3639	29.1852
31	29.9642	29.9115	29.7874	29.724	29.717	29.7133	29.6028	29.3639	29.1472
31	29.9642	29.9115	29.7874	29.724	29.717	29.7133	29.6028	29.3639	29.0483
31	29.9642	29.9115	29.7874	29.724	29.717	29.7133	29.6028	29.3639	28.9243
31	29.9642	29.9115	29.7874	29.724	29.717	29.7133	29.6028	29.3591	29.306
31	29.9642	29.9115	29.7874	29.724	29.717	29.7133	29.6028	29.3591	29.1852
31	29.9642	29.9115	29.7874	29.724	29.717	29.7133	29.6028	29.3591	29.1472
31	29.9642	29.9115	29.7874	29.724	29.717	29.7133	29.6028	29.3591	29.0483
31	29.9642	29.9115	29.7874	29.724	29.717	29.7133	29.6028	29.3591	28.9243
31	29.9642	29.9115	29.7874	29.724	29.717	29.7133	29.6028	29.3418	29.306
31	29.9642	29.9115	29.7874	29.724	29.717	29.7133	29.6028	29.3418	29.1852
31	29.9642	29.9115	29.7874	29.724	29.717	29.7133	29.6028	29.3418	29.1472
31	29.9642	29.9115	29.7874	29.724	29.717	29.7133	29.6028	29.3418	29.0483
31	29.9642	29.9115	29.7874	29.724	29.717	29.7133	29.6028	29.3418	28.9243
31	29.9642	29.9115	29.7874	29.724	29.717	29.7133	29.6028	29.306	29.1852
31	29.9642	29.9115	29.7874	29.724	29.717	29.7133	29.6028	29.306	29.1472
31	29.9642	29.9115	29.7874	29.724	29.717	29.7133	29.6028	29.306	29.0483
31	29.9642	29.9115	29.7874	29.724	29.717	29.7133	29.6028	29.306	28.9243
31	29.9642	29.9115	29.7874	29.724	29.717	29.7133	29.6028	29.1852	29.1472
31	29.9642	29.9115	29.7874	29.724	29.717	29.7133	29.6028	29.1852	29.0483
31	29.9642	29.9115	29.7874	29.724	29.717	29.7133	29.5435	29.5424	29.1472
31	29.9642	29.9115	29.7874	29.724	29.717	29.7133	29.5435	29.5424	29.0483
31	29.9642	29.9115	29.7874	29.724	29.717	29.7133	29.5435	29.5424	28.9243
31	29.9642	29.9115	29.7874	29.724	29.717	29.7133	29.5435	29.5424	28.8568
31	29.9642	29.9115	29.7874	29.724	29.717	29.7133	29.5435	29.5424	28.7557
31	29.9642	29.9115	29.7874	29.724	29.717	29.7133	29.5435	29.5326	29.1852
31	29.9642	29.9115	29.7874	29.724	29.717	29.7133	29.5435	29.5326	29.1472
31	29.9642	29.9115	29.7874	29.724	29.717	29.7133	29.5435	29.5326	29.0483
31	29.9642	29.9115	29.7874	29.724	29.717	29.7133	29.5435	29.5326	28.9243
31	29.9642	29.9115	29.7874	29.724	29.717	29.7133	29.5435	29.5326	28.8568
31	29.9642	29.9115	29.7874	29.724	29.717	29.7133	29.5435	29.5326	28.7557
31	29.9642	29.9115	29.7874	29.724	29.717	29.7133	29.5435	29.5243	29.1852
31	29.9642	29.9115	29.7874	29.724	29.717	29.7133	29.5435	29.5243	29.1472
31	29.9642	29.9115	29.7874	29.724	29.717	29.7133	29.5435	29.5243	29.0483
31	29.9642	29.9115	29.7874	29.724	29.717	29.7133	29.5435	29.5243	28.9243
31	29.9642	29.9115	29.7874	29.724	29.717	29.7133	29.5435	29.5243	28.8568
31	29.9642	29.9115	29.7874	29.724	29.717	29.7133	29.5435	29.4468	29.1852
31	29.9642	29.9115	29.7874	29.724	29.717	29.7133	29.5435	29.4468	29.1472
31	29.9642	29.9115	29.7874	29.724	29.717	29.7133	29.5435	29.4468	29.0483
31	29.9642	29.9115	29.7874	29.724	29.717	29.7133	29.5435	29.4468	28.9243
31	29.9642	29.9115	29.7874	29.724	29.717	29.7133	29.5435	29.4468	28.8568
31	29.9642	29.9115	29.7874	29.724	29.717	29.7133	29.5435	29.4122	29.306
31	29.9642	29.9115	29.7874	29.724	29.717	29.7133	29.5435	29.4122	29.1852
31	29.9642	29.9115	29.7874	29.724	29.717	29.7133	29.5435	29.4122	29.1472
31	29.9642	29.9115	29.7874	29.724	29.717	29.7133	29.5435	29.4122	29.0483
31	29.9642	29.9115	29.7874	29.724	29.717	29.7133	29.5435	29.4122	28.9243
31	29.9642	29.9115	29.7874	29.724	29.717	29.7133	29.5435	29.3639	29.3591
31	29.9642	29.9115	29.7874	29.724	29.717	29.7133	29.5435	29.3639	29.3418
31	29.9642	29.9115	29.7874	29.724	29.717	29.7133	29.5435	29.3639	29.306
31	29.9642	29.9115	29.7874	29.724	29.717	29.7133	29.5435	29.3639	29.1852
31	29.9642	29.9115	29.7874	29.724	29.717	29.7133	29.5435	29.3639	29.1472
31	29.9642	29.9115	29.7874	29.724	29.717	29.7133	29.5435	29.3639	29.0483
31	29.9642	29.9115	29.7874	29.724	29.717	29.7133	29.5435	29.3639	28.9243
31	29.9642	29.9115	29.7874	29.724	29.717	29.7133	29.5435	29.3591	29.3418
31	29.9642	29.9115	29.7874	29.724	29.717	29.7133	29.5435	29.3591	29.306
31	29.9642	29.9115	29.7874	29.724	29.717	29.7133	29.5435	29.3591	29.1852
31	29.9642	29.9115	29.7874	29.724	29.717	29.7133	29.5435	29.3591	29.1472
31	29.9642	29.9115	29.7874	29.724	29.717	29.7133	29.5435	29.3591	29.0483
31	29.9642	29.9115	29.7874	29.724	29.717	29.7133	29.5435	29.3418	29.306
31	29.9642	29.9115	29.7874	29.724	29.717	29.7133	29.5435	29.3418	29.1852
31	29.9642	29.9115	29.7874	29.724	29.717	29.7133	29.5435	29.3418	29.1472
31	29.9642	29.9115	29.7874	29.724	29.717	29.7133	29.5435	29.3418	29.0483
31	29.9642	29.9115	29.7874	29.724	29.717	29.7133	29.5435	29.306	29.1852
31	29.9642	29.9115	29.7874	29.724	29.717	29.7133	29.5435	29.306	29.1472
31	29.9642	29.9115	29.7874	29.724	29.717	29.7133	29.5435	29.306	29.0483
31	29.9642	29.9115	29.7874	29.724	29.717	29.7133	29.5435	29.1852	29.1472
31	29.9642	29.9115	29.7874	29.724	29.717	29.7133	29.5424	29.5326	29.1852
31	29.9642	29.9115	29.7874	29.724	29.717	29.7133	29.5424	29.5326	29.1472
31	29.9642	29.9115	29.7874	29.724	29.717	29.7133	29.5424	29.5326	29.0483
31	29.9642	29.9115	29.7874	29.724	29.717	29.7133	29.5424	29.5326	28.9243
31	29.9642	29.9115	29.7874	29.724	29.717	29.7133	29.5424	29.5326	28.8568
31	29.9642	29.9115	29.7874	29.724	29.717	29.7133	29.5424	29.5326	28.7557
31	29.9642	29.9115	29.7874	29.724	29.717	29.7133	29.5424	29.5243	29.1852
31	29.9642	29.9115	29.7874	29.724	29.717	29.7133	29.5424	29.5243	29.1472
31	29.9642	29.9115	29.7874	29.724	29.717	29.7133	29.5424	29.5243	29.0483
31	29.9642	29.9115	29.7874	29.724	29.717	29.7133	29.5424	29.5243	28.9243
31	29.9642	29.9115	29.7874	29.724	29.717	29.7133	29.5424	29.5243	28.8568
31	29.9642	29.9115	29.7874	29.724	29.717	29.7133	29.5424	29.4468	29.1852
31	29.9642	29.9115	29.7874	29.724	29.717	29.7133	29.5424	29.4468	29.1472
31	29.9642	29.9115	29.7874	29.724	29.717	29.7133	29.5424	29.4468	29.0483
31	29.9642	29.9115	29.7874	29.724	29.717	29.7133	29.5424	29.4468	28.9243
31	29.9642	29.9115	29.7874	29.724	29.717	29.7133	29.5424	29.4468	28.8568
31	29.9642	29.9115	29.7874	29.724	29.717	29.7133	29.5424	29.4122	29.306
31	29.9642	29.9115	29.7874	29.724	29.717	29.7133	29.5424	29.4122	29.1852
31	29.9642	29.9115	29.7874	29.724	29.717	29.7133	29.5424	29.4122	29.1472
31	29.9642	29.9115	29.7874	29.724	29.717	29.7133	29.5424	29.4122	29.0483
31	29.9642	29.9115	29.7874	29.724	29.717	29.7133	29.5424	29.4122	28.9243
31	29.9642	29.9115	29.7874	29.724	29.717	29.7133	29.5424	29.3639	29.3591
31	29.9642	29.9115	29.7874	29.724	29.717	29.7133	29.5424	29.3639	29.3418
31	29.9642	29.9115	29.7874	29.724	29.717	29.7133	29.5424	29.3639	29.306
31	29.9642	29.9115	29.7874	29.724	29.717	29.7133	29.5424	29.3639	29.1852
31	29.9642	29.9115	29.7874	29.724	29.717	29.7133	29.5424	29.3639	29.1472
31	29.9642	29.9115	29.7874	29.724	29.717	29.7133	29.5424	29.3639	29.0483
31	29.9642	29.9115	29.7874	29.724	29.717	29.7133	29.5424	29.3591	29.3418
31	29.9642	29.9115	29.7874	29.724	29.717	29.7133	29.5424	29.3591	29.306
31	29.9642	29.9115	29.7874	29.724	29.717	29.7133	29.5424	29.3591	29.1852
31	29.9642	29.9115	29.7874	29.724	29.717	29.7133	29.5424	29.3591	29.1472
31	29.9642	29.9115	29.7874	29.724	29.717	29.7133	29.5424	29.3591	29.0483
31	29.9642	29.9115	29.7874	29.724	29.717	29.7133	29.5424	29.3418	29.306
31	29.9642	29.9115	29.7874	29.724	29.717	29.7133	29.5424	29.3418	29.1852
31	29.9642	29.9115	29.7874	29.724	29.717	29.7133	29.5424	29.3418	29.1472
31	29.9642	29.9115	29.7874	29.724	29.717	29.7133	29.5424	29.3418	29.0483
31	29.9642	29.9115	29.7874	29.724	29.717	29.7133	29.5424	29.306	29.1852
31	29.9642	29.9115	29.7874	29.724	29.717	29.7133	29.5424	29.306	29.1472
31	29.9642	29.9115	29.7874	29.724	29.717	29.7133	29.5424	29.306	29.0483
31	29.9642	29.9115	29.7874	29.724	29.717	29.7133	29.5424	29.1852	29.1472
31	29.9642	29.9115	29.7874	29.724	29.717	29.7133	29.5326	29.5243	29.1852
31	29.9642	29.9115	29.7874	29.724	29.717	29.7133	29.5326	29.5243	29.1472
31	29.9642	29.9115	29.7874	29.724	29.717	29.7133	29.5326	29.5243	29.0483
31	29.9642	29.9115	29.7874	29.724	29.717	29.7133	29.5326	29.5243	28.9243
31	29.9642	29.9115	29.7874	29.724	29.717	29.7133	29.5326	29.5243	28.8568
31	29.9642	29.9115	29.7874	29.724	29.717	29.7133	29.5326	29.4468	29.1852
31	29.9642	29.9115	29.7874	29.724	29.717	29.7133	29.5326	29.4468	29.1472
31	29.9642	29.9115	29.7874	29.724	29.717	29.7133	29.5326	29.4468	29.0483
31	29.9642	29.9115	29.7874	29.724	29.717	29.7133	29.5326	29.4468	28.9243
31	29.9642	29.9115	29.7874	29.724	29.717	29.7133	29.5326	29.4468	28.8568
31	29.9642	29.9115	29.7874	29.724	29.717	29.7133	29.5326	29.4122	29.306
31	29.9642	29.9115	29.7874	29.724	29.717	29.7133	29.5326	29.4122	29.1852
31	29.9642	29.9115	29.7874	29.724	29.717	29.7133	29.5326	29.4122	29.1472
31	29.9642	29.9115	29.7874	29.724	29.717	29.7133	29.5326	29.4122	29.0483
31	29.9642	29.9115	29.7874	29.724	29.717	29.7133	29.5326	29.4122	28.9243
31	29.9642	29.9115	29.7874	29.724	29.717	29.7133	29.5326	29.3639	29.3591
31	29.9642	29.9115	29.7874	29.724	29.717	29.7133	29.5326	29.3639	29.3418
31	29.9642	29.9115	29.7874	29.724	29.717	29.7133	29.5326	29.3639	29.306
31	29.9642	29.9115	29.7874	29.724	29.717	29.7133	29.5326	29.3639	29.1852
31	29.9642	29.9115	29.7874	29.724	29.717	29.7133	29.5326	29.3639	29.1472
31	29.9642	29.9115	29.7874	29.724	29.717	29.7133	29.5326	29.3639	29.0483
31	29.9642	29.9115	29.7874	29.724	29.717	29.7133	29.5326	29.3591	29.3418
31	29.9642	29.9115	29.7874	29.724	29.717	29.7133	29.5326	29.3591	29.306
31	29.9642	29.9115	29.7874	29.724	29.717	29.7133	29.5326	29.3591	29.1852
31	29.9642	29.9115	29.7874	29.724	29.717	29.7133	29.5326	29.3591	29.1472
31	29.9642	29.9115	29.7874	29.724	29.717	29.7133	29.5326	29.3591	29.0483
31	29.9642	29.9115	29.7874	29.724	29.717	29.7133	29.5326	29.3418	29.306
31	29.9642	29.9115	29.7874	29.724	29.717	29.7133	29.5326	29.3418	29.1852
31	29.9642	29.9115	29.7874	29.724	29.717	29.7133	29.5326	29.3418	29.1472
31	29.9642	29.9115	29.7874	29.724	29.717	29.7133	29.5326	29.3418	29.0483
31	29.9642	29.9115	29.7874	29.724	29.717	29.7133	29.5326	29.306	29.1852
31	29.9642	29.9115	29.7874	29.724	29.717	29.7133	29.5326	29.306	29.1472
31	29.9642	29.9115	29.7874	29.724	29.717	29.7133	29.5326	29.306	29.0483
31	29.9642	29.9115	29.7874	29.724	29.717	29.7133	29.5326	29.1852	29.1472
31	29.9642	29.9115	29.7874	29.724	29.717	29.7133	29.5243	29.4468	29.1852
31	29.9642	29.9115	29.7874	29.724	29.717	29.7133	29.5243	29.4468	29.1472
31	29.9642	29.9115	29.7874	29.724	29.717	29.7133	29.5243	29.4468	29.0483
31	29.9642	29.9115	29.7874	29.724	29.717	29.7133	29.5243	29.4468	28.9243
31	29.9642	29.9115	29.7874	29.724	29.717	29.7133	29.5243	29.4122	29.306
31	29.9642	29.9115	29.7874	29.724	29.717	29.7133	29.5243	29.4122	29.1852
31	29.9642	29.9115	29.7874	29.724	29.717	29.7133	29.5243	29.4122	29.1472
31	29.9642	29.9115	29.7874	29.724	29.717	29.7133	29.5243	29.4122	29.0483
31	29.9642	29.9115	29.7874	29.724	29.717	29.7133	29.5243	29.4122	28.9243
31	29.9642	29.9115	29.7874	29.724	29.717	29.7133	29.5243	29.3639	29.3591
31	29.9642	29.9115	29.7874	29.724	29.717	29.7133	29.5243	29.3639	29.3418
31	29.9642	29.9115	29.7874	29.724	29.717	29.7133	29.5243	29.3639	29.306
31	29.9642	29.9115	29.7874	29.724	29.717	29.7133	29.5243	29.3639	29.1852
31	29.9642	29.9115	29.7874	29.724	29.717	29.7133	29.5243	29.3639	29.1472
31	29.9642	29.9115	29.7874	29.724	29.717	29.7133	29.5243	29.3639	29.0483
31	29.9642	29.9115	29.7874	29.724	29.717	29.7133	29.5243	29.3591	29.3418
31	29.9642	29.9115	29.7874	29.724	29.717	29.7133	29.5243	29.3591	29.306
31	29.9642	29.9115	29.7874	29.724	29.717	29.7133	29.5243	29.3591	29.1852
31	29.9642	29.9115	29.7874	29.724	29.717	29.7133	29.5243	29.3591	29.1472
31	29.9642	29.9115	29.7874	29.724	29.717	29.7133	29.5243	29.3591	29.0483
31	29.9642	29.9115	29.7874	29.724	29.717	29.7133	29.5243	29.3418	29.306
31	29.9642	29.9115	29.7874	29.724	29.717	29.7133	29.5243	29.3418	29.1852
31	29.9642	29.9115	29.7874	29.724	29.717	29.7133	29.5243	29.3418	29.1472
31	29.9642	29.9115	29.7874	29.724	29.717	29.7133	29.5243	29.3418	29.0483
31	29.9642	29.9115	29.7874	29.724	29.717	29.7133	29.5243	29.306	29.1852
31	29.9642	29.9115	29.7874	29.724	29.717	29.7133	29.5243	29.306	29.1472
31	29.9642	29.9115	29.7874	29.724	29.717	29.7133	29.5243	29.306	29.0483
31	29.9642	29.9115	29.7874	29.724	29.717	29.7133	29.5243	29.1852	29.1472
31	29.9642	29.9115	29.7874	29.724	29.717	29.7133	29.4468	29.4122	29.3639
31	29.9642	29.9115	29.7874	29.724	29.717	29.7133	29.4468	29.4122	29.3591
31	29.9642	29.9115	29.7874	29.724	29.717	29.7133	29.4468	29.4122	29.3418
31	29.9642	29.9115	29.7874	29.724	29.717	29.7133	29.4468	29.4122	29.306
31	29.9642	29.9115	29.7874	29.724	29.717	29.7133	29.4468	29.4122	29.1852
31	29.9642	29.9115	29.7874	29.724	29.717	29.7133	29.4468	29.4122	29.1472
31	29.9642	29.9115	29.7874	29.724	29.717	29.7133	29.4468	29.4122	29.0483
31	29.9642	29.9115	29.7874	29.724	29.717	29.7133	29.4468	29.3639	29.3591
31	29.9642	29.9115	29.7874	29.724	29.717	29.7133	29.4468	29.3639	29.3418
31	29.9642	29.9115	29.7874	29.724	29.717	29.7133	29.4468	29.3639	29.306
31	29.9642	29.9115	29.7874	29.724	29.717	29.7133	29.4468	29.3639	29.1852
31	29.9642	29.9115	29.7874	29.724	29.717	29.7133	29.4468	29.3639	29.1472
31	29.9642	29.9115	29.7874	29.724	29.717	29.7133	29.4468	29.3639	29.0483
31	29.9642	29.9115	29.7874	29.724	29.717	29.7133	29.4468	29.3591	29.3418
31	29.9642	29.9115	29.7874	29.724	29.717	29.7133	29.4468	29.3591	29.306
31	29.9642	29.9115	29.7874	29.724	29.717	29.7133	29.4468	29.3591	29.1852
31	29.9642	29.9115	29.7874	29.724	29.717	29.7133	29.4468	29.3591	29.1472
31	29.9642	29.9115	29.7874	29.724	29.717	29.7133	29.4468	29.3591	29.0483
31	29.9642	29.9115	29.7874	29.724	29.717	29.7133	29.4468	29.3418	29.306
31	29.9642	29.9115	29.7874	29.724	29.717	29.7133	29.4468	29.3418	29.1852
31	29.9642	29.9115	29.7874	29.724	29.717	29.7133	29.4468	29.3418	29.1472
31	29.9642	29.9115	29.7874	29.724	29.717	29.7133	29.4468	29.3418	29.0483
31	29.9642	29.9115	29.7874	29.724	29.717	29.7133	29.4468	29.306	29.1852
31	29.9642	29.9115	29.7874	29.724	29.717	29.7133	29.4468	29.306	29.1472
31	29.9642	29.9115	29.7874	29.724	29.717	29.7133	29.4122	29.3639	29.3591
31	29.9642	29.9115	29.7874	29.724	29.717	29.7133	29.4122	29.3639	29.3418
31	29.9642	29.9115	29.7874	29.724	29.717	29.7133	29.4122	29.3639	29.306
31	29.9642	29.9115	29.7874	29.724	29.717	29.7133	29.4122	29.3639	29.1852
31	29.9642	29.9115	29.7874	29.724	29.717	29.7133	29.4122	29.3639	29.1472
31	29.9642	29.9115	29.7874	29.724	29.717	29.7133	29.4122	29.3591	29.3418
31	29.9642	29.9115	29.7874	29.724	29.717	29.7133	29.4122	29.3591	29.306
31	29.9642	29.9115	29.7874	29.724	29.717	29.7133	29.4122	29.3591	29.1852
31	29.9642	29.9115	29.7874	29.724	29.717	29.7133	29.4122	29.3591	29.1472
31	29.9642	29.9115	29.7874	29.724	29.717	29.7133	29.4122	29.3418	29.306
31	29.9642	29.9115	29.7874	29.724	29.717	29.7133	29.4122	29.3418	29.1852
31	29.9642	29.9115	29.7874	29.724	29.717	29.7133	29.4122	29.3418	29.1472
31	29.9642	29.9115	29.7874	29.724	29.717	29.7133	29.4122	29.306	29.1852
31	29.9642	29.9115	29.7874	29.724	29.717	29.7133	29.4122	29.306	29.1472
31	29.9642	29.9115	29.7874	29.724	29.717	29.7133	29.3639	29.3591	29.3418
31	29.9642	29.9115	29.7874	29.724	29.717	29.7133	29.3639	29.3591	29.306
31	29.9642	29.9115	29.7874	29.724	29.717	29.7133	29.3639	29.3591	29.1852
31	29.9642	29.9115	29.7874	29.724	29.717	29.7133	29.3639	29.3591	29.1472
31	29.9642	29.9115	29.7874	29.724	29.717	29.7133	29.3639	29.3418	29.306
31	29.9642	29.9115	29.7874	29.724	29.717	29.7133	29.3639	29.3418	29.1852
31	29.9642	29.9115	29.7874	29.724	29.717	29.7133	29.3639	29.3418	29.1472
31	29.9642	29.9115	29.7874	29.724	29.717	29.7133	29.3639	29.306	29.1852
31	29.9642	29.9115	29.7874	29.724	29.717	29.7133	29.3591	29.3418	29.306
31	29.9642	29.9115	29.7874	29.724	29.717	29.7133	29.3591	29.3418	29.1852
31	29.9642	29.9115	29.7874	29.724	29.717	29.7133	29.3591	29.3418	29.1472
31	29.9642	29.9115	29.7874	29.724	29.717	29.7133	29.3591	29.306	29.1852
31	29.9642	29.9115	29.7874	29.724	29.717	29.7133	29.3418	29.306	29.1852
31	29.9642	29.9115	29.7874	29.724	29.717	29.6861	29.6744	29.6396	28.9243
31	29.9642	29.9115	29.7874	29.724	29.717	29.6861	29.6744	29.6396	28.8568
31	29.9642	29.9115	29.7874	29.724	29.717	29.6861	29.6744	29.6396	28.7557
31	29.9642	29.9115	29.7874	29.724	29.717	29.6861	29.6744	29.6248	28.9243
31	29.9642	29.9115	29.7874	29.724	29.717	29.6861	29.6744	29.6248	28.8568
31	29.9642	29.9115	29.7874	29.724	29.717	29.6861	29.6744	29.6248	28.7557
31	29.9642	29.9115	29.7874	29.724	29.717	29.6861	29.6744	29.6046	28.9243
31	29.9642	29.9115	29.7874	29.724	29.717	29.6861	29.6744	29.6046	28.8568
31	29.9642	29.9115	29.7874	29.724	29.717	29.6861	29.6744	29.6046	28.7557
31	29.9642	29.9115	29.7874	29.724	29.717	29.6861	29.6744	29.6028	28.9243
31	29.9642	29.9115	29.7874	29.724	29.717	29.6861	29.6744	29.6028	28.8568
31	29.9642	29.9115	29.7874	29.724	29.717	29.6861	29.6744	29.6028	28.7557
31	29.9642	29.9115	29.7874	29.724	29.717	29.6861	29.6744	29.5435	29.0483
31	29.9642	29.9115	29.7874	29.724	29.717	29.6861	29.6744	29.5435	28.9243
31	29.9642	29.9115	29.7874	29.724	29.717	29.6861	29.6744	29.5435	28.8568
31	29.9642	29.9115	29.7874	29.724	29.717	29.6861	29.6744	29.5435	28.7557
31	29.9642	29.9115	29.7874	29.724	29.717	29.6861	29.6744	29.5424	29.0483
31	29.9642	29.9115	29.7874	29.724	29.717	29.6861	29.6744	29.5424	28.9243
31	29.9642	29.9115	29.7874	29.724	29.717	29.6861	29.6744	29.5424	28.8568
31	29.9642	29.9115	29.7874	29.724	29.717	29.6861	29.6744	29.5424	28.7557
31	29.9642	29.9115	29.7874	29.724	29.717	29.6861	29.6744	29.5326	29.0483
31	29.9642	29.9115	29.7874	29.724	29.717	29.6861	29.6744	29.5326	28.9243
31	29.9642	29.9115	29.7874	29.724	29.717	29.6861	29.6744	29.5326	28.8568
31	29.9642	29.9115	29.7874	29.724	29.717	29.6861	29.6744	29.5326	28.7557
31	29.9642	29.9115	29.7874	29.724	29.717	29.6861	29.6744	29.5243	29.0483
31	29.9642	29.9115	29.7874	29.724	29.717	29.6861	29.6744	29.5243	28.9243
31	29.9642	29.9115	29.7874	29.724	29.717	29.6861	29.6744	29.5243	28.8568
31	29.9642	29.9115	29.7874	29.724	29.717	29.6861	29.6744	29.5243	28.7557
31	29.9642	29.9115	29.7874	29.724	29.717	29.6861	29.6744	29.4468	29.1472
31	29.9642	29.9115	29.7874	29.724	29.717	29.6861	29.6744	29.4468	29.0483
31	29.9642	29.9115	29.7874	29.724	29.717	29.6861	29.6744	29.4468	28.9243
31	29.9642	29.9115	29.7874	29.724	29.717	29.6861	29.6744	29.4468	28.8568
31	29.9642	29.9115	29.7874	29.724	29.717	29.6861	29.6744	29.4468	28.7557
31	29.9642	29.9115	29.7874	29.724	29.717	29.6861	29.6744	29.4122	29.1852
31	29.9642	29.9115	29.7874	29.724	29.717	29.6861	29.6744	29.4122	29.1472
31	29.9642	29.9115	29.7874	29.724	29.717	29.6861	29.6744	29.4122	29.0483
31	29.9642	29.9115	29.7874	29.724	29.717	29.6861	29.6744	29.4122	28.9243
31	29.9642	29.9115	29.7874	29.724	29.717	29.6861	29.6744	29.4122	28.8568
31	29.9642	29.9115	29.7874	29.724	29.717	29.6861	29.6744	29.3639	29.1852
31	29.9642	29.9115	29.7874	29.724	29.717	29.6861	29.6744	29.3639	29.1472
31	29.9642	29.9115	29.7874	29.724	29.717	29.6861	29.6744	29.3639	29.0483
31	29.9642	29.9115	29.7874	29.724	29.717	29.6861	29.6744	29.3639	28.9243
31	29.9642	29.9115	29.7874	29.724	29.717	29.6861	29.6744	29.3639	28.8568
31	29.9642	29.9115	29.7874	29.724	29.717	29.6861	29.6744	29.3591	29.1852
31	29.9642	29.9115	29.7874	29.724	29.717	29.6861	29.6744	29.3591	29.1472
31	29.9642	29.9115	29.7874	29.724	29.717	29.6861	29.6744	29.3591	29.0483
31	29.9642	29.9115	29.7874	29.724	29.717	29.6861	29.6744	29.3591	28.9243
31	29.9642	29.9115	29.7874	29.724	29.717	29.6861	29.6744	29.3591	28.8568
31	29.9642	29.9115	29.7874	29.724	29.717	29.6861	29.6744	29.3418	29.1852
31	29.9642	29.9115	29.7874	29.724	29.717	29.6861	29.6744	29.3418	29.1472
31	29.9642	29.9115	29.7874	29.724	29.717	29.6861	29.6744	29.3418	29.0483
31	29.9642	29.9115	29.7874	29.724	29.717	29.6861	29.6744	29.3418	28.9243
31	29.9642	29.9115	29.7874	29.724	29.717	29.6861	29.6744	29.3418	28.8568
31	29.9642	29.9115	29.7874	29.724	29.717	29.6861	29.6744	29.306	29.1852
31	29.9642	29.9115	29.7874	29.724	29.717	29.6861	29.6744	29.306	29.1472
31	29.9642	29.9115	29.7874	29.724	29.717	29.6861	29.6744	29.306	29.0483
31	29.9642	29.9115	29.7874	29.724	29.717	29.6861	29.6744	29.306	28.9243
31	29.9642	29.9115	29.7874	29.724	29.717	29.6861	29.6744	29.1852	29.1472
31	29.9642	29.9115	29.7874	29.724	29.717	29.6861	29.6744	29.1852	29.0483
31	29.9642	29.9115	29.7874	29.724	29.717	29.6861	29.6744	29.1472	29.0483
31	29.9642	29.9115	29.7874	29.724	29.717	29.6861	29.6396	29.6248	28.9243
31	29.9642	29.9115	29.7874	29.724	29.717	29.6861	29.6396	29.6248	28.8568
31	29.9642	29.9115	29.7874	29.724	29.717	29.6861	29.6396	29.6248	28.7557
31	29.9642	29.9115	29.7874	29.724	29.717	29.6861	29.6396	29.6046	29.0483
31	29.9642	29.9115	29.7874	29.724	29.717	29.6861	29.6396	29.6046	28.9243
31	29.9642	29.9115	29.7874	29.724	29.717	29.6861	29.6396	29.6046	28.8568
31	29.9642	29.9115	29.7874	29.724	29.717	29.6861	29.6396	29.6046	28.7557
31	29.9642	29.9115	29.7874	29.724	29.717	29.6861	29.6396	29.6028	29.0483
31	29.9642	29.9115	29.7874	29.724	29.717	29.6861	29.6396	29.6028	28.9243
31	29.9642	29.9115	29.7874	29.724	29.717	29.6861	29.6396	29.6028	28.8568
31	29.9642	29.9115	29.7874	29.724	29.717	29.6861	29.6396	29.6028	28.7557
31	29.9642	29.9115	29.7874	29.724	29.717	29.6861	29.6396	29.5435	29.0483
31	29.9642	29.9115	29.7874	29.724	29.717	29.6861	29.6396	29.5435	28.9243
31	29.9642	29.9115	29.7874	29.724	29.717	29.6861	29.6396	29.5435	28.8568
31	29.9642	29.9115	29.7874	29.724	29.717	29.6861	29.6396	29.5435	28.7557
31	29.9642	29.9115	29.7874	29.724	29.717	29.6861	29.6396	29.5424	29.0483
31	29.9642	29.9115	29.7874	29.724	29.717	29.6861	29.6396	29.5424	28.9243
31	29.9642	29.9115	29.7874	29.724	29.717	29.6861	29.6396	29.5424	28.8568
31	29.9642	29.9115	29.7874	29.724	29.717	29.6861	29.6396	29.5424	28.7557
31	29.9642	29.9115	29.7874	29.724	29.717	29.6861	29.6396	29.5326	29.0483
31	29.9642	29.9115	29.7874	29.724	29.717	29.6861	29.6396	29.5326	28.9243
31	29.9642	29.9115	29.7874	29.724	29.717	29.6861	29.6396	29.5326	28.8568
31	29.9642	29.9115	29.7874	29.724	29.717	29.6861	29.6396	29.5326	28.7557
31	29.9642	29.9115	29.7874	29.724	29.717	29.6861	29.6396	29.5243	29.0483
31	29.9642	29.9115	29.7874	29.724	29.717	29.6861	29.6396	29.5243	28.9243
31	29.9642	29.9115	29.7874	29.724	29.717	29.6861	29.6396	29.5243	28.8568
31	29.9642	29.9115	29.7874	29.724	29.717	29.6861	29.6396	29.5243	28.7557
31	29.9642	29.9115	29.7874	29.724	29.717	29.6861	29.6396	29.4468	29.1852
31	29.9642	29.9115	29.7874	29.724	29.717	29.6861	29.6396	29.4468	29.1472
31	29.9642	29.9115	29.7874	29.724	29.717	29.6861	29.6396	29.4468	29.0483
31	29.9642	29.9115	29.7874	29.724	29.717	29.6861	29.6396	29.4468	28.9243
31	29.9642	29.9115	29.7874	29.724	29.717	29.6861	29.6396	29.4468	28.8568
31	29.9642	29.9115	29.7874	29.724	29.717	29.6861	29.6396	29.4122	29.1852
31	29.9642	29.9115	29.7874	29.724	29.717	29.6861	29.6396	29.4122	29.1472
31	29.9642	29.9115	29.7874	29.724	29.717	29.6861	29.6396	29.4122	29.0483
31	29.9642	29.9115	29.7874	29.724	29.717	29.6861	29.6396	29.4122	28.9243
31	29.9642	29.9115	29.7874	29.724	29.717	29.6861	29.6396	29.4122	28.8568
31	29.9642	29.9115	29.7874	29.724	29.717	29.6861	29.6396	29.3639	29.1852
31	29.9642	29.9115	29.7874	29.724	29.717	29.6861	29.6396	29.3639	29.1472
31	29.9642	29.9115	29.7874	29.724	29.717	29.6861	29.6396	29.3639	29.0483
31	29.9642	29.9115	29.7874	29.724	29.717	29.6861	29.6396	29.3639	28.9243
31	29.9642	29.9115	29.7874	29.724	29.717	29.6861	29.6396	29.3639	28.8568
31	29.9642	29.9115	29.7874	29.724	29.717	29.6861	29.6396	29.3591	29.1852
31	29.9642	29.9115	29.7874	29.724	29.717	29.6861	29.6396	29.3591	29.1472
31	29.9642	29.9115	29.7874	29.724	29.717	29.6861	29.6396	29.3591	29.0483
31	29.9642	29.9115	29.7874	29.724	29.717	29.6861	29.6396	29.3591	28.9243
31	29.9642	29.9115	29.7874	29.724	29.717	29.6861	29.6396	29.3418	29.306
31	29.9642	29.9115	29.7874	29.724	29.717	29.6861	29.6396	29.3418	29.1852
31	29.9642	29.9115	29.7874	29.724	29.717	29.6861	29.6396	29.3418	29.1472
31	29.9642	29.9115	29.7874	29.724	29.717	29.6861	29.6396	29.3418	29.0483
31	29.9642	29.9115	29.7874	29.724	29.717	29.6861	29.6396	29.3418	28.9243
31	29.9642	29.9115	29.7874	29.724	29.717	29.6861	29.6396	29.306	29.1852
31	29.9642	29.9115	29.7874	29.724	29.717	29.6861	29.6396	29.306	29.1472
31	29.9642	29.9115	29.7874	29.724	29.717	29.6861	29.6396	29.306	29.0483
31	29.9642	29.9115	29.7874	29.724	29.717	29.6861	29.6396	29.306	28.9243
31	29.9642	29.9115	29.7874	29.724	29.717	29.6861	29.6396	29.1852	29.1472
31	29.9642	29.9115	29.7874	29.724	29.717	29.6861	29.6396	29.1852	29.0483
31	29.9642	29.9115	29.7874	29.724	29.717	29.6861	29.6248	29.6046	29.0483
31	29.9642	29.9115	29.7874	29.724	29.717	29.6861	29.6248	29.6046	28.9243
31	29.9642	29.9115	29.7874	29.724	29.717	29.6861	29.6248	29.6046	28.8568
31	29.9642	29.9115	29.7874	29.724	29.717	29.6861	29.6248	29.6046	28.7557
31	29.9642	29.9115	29.7874	29.724	29.717	29.6861	29.6248	29.6028	29.0483
31	29.9642	29.9115	29.7874	29.724	29.717	29.6861	29.6248	29.6028	28.9243
31	29.9642	29.9115	29.7874	29.724	29.717	29.6861	29.6248	29.6028	28.8568
31	29.9642	29.9115	29.7874	29.724	29.717	29.6861	29.6248	29.6028	28.7557
31	29.9642	29.9115	29.7874	29.724	29.717	29.6861	29.6248	29.5435	29.0483
31	29.9642	29.9115	29.7874	29.724	29.717	29.6861	29.6248	29.5435	28.9243
31	29.9642	29.9115	29.7874	29.724	29.717	29.6861	29.6248	29.5435	28.8568
31	29.9642	29.9115	29.7874	29.724	29.717	29.6861	29.6248	29.5435	28.7557
31	29.9642	29.9115	29.7874	29.724	29.717	29.6861	29.6248	29.5424	29.0483
31	29.9642	29.9115	29.7874	29.724	29.717	29.6861	29.6248	29.5424	28.9243
31	29.9642	29.9115	29.7874	29.724	29.717	29.6861	29.6248	29.5424	28.8568
31	29.9642	29.9115	29.7874	29.724	29.717	29.6861	29.6248	29.5424	28.7557
31	29.9642	29.9115	29.7874	29.724	29.717	29.6861	29.6248	29.5326	29.0483
31	29.9642	29.9115	29.7874	29.724	29.717	29.6861	29.6248	29.5326	28.9243
31	29.9642	29.9115	29.7874	29.724	29.717	29.6861	29.6248	29.5326	28.8568
31	29.9642	29.9115	29.7874	29.724	29.717	29.6861	29.6248	29.5326	28.7557
31	29.9642	29.9115	29.7874	29.724	29.717	29.6861	29.6248	29.5243	29.1472
31	29.9642	29.9115	29.7874	29.724	29.717	29.6861	29.6248	29.5243	29.0483
31	29.9642	29.9115	29.7874	29.724	29.717	29.6861	29.6248	29.5243	28.9243
31	29.9642	29.9115	29.7874	29.724	29.717	29.6861	29.6248	29.5243	28.8568
31	29.9642	29.9115	29.7874	29.724	29.717	29.6861	29.6248	29.5243	28.7557
31	29.9642	29.9115	29.7874	29.724	29.717	29.6861	29.6248	29.4468	29.1852
31	29.9642	29.9115	29.7874	29.724	29.717	29.6861	29.6248	29.4468	29.1472
31	29.9642	29.9115	29.7874	29.724	29.717	29.6861	29.6248	29.4468	29.0483
31	29.9642	29.9115	29.7874	29.724	29.717	29.6861	29.6248	29.4468	28.9243
31	29.9642	29.9115	29.7874	29.724	29.717	29.6861	29.6248	29.4468	28.8568
31	29.9642	29.9115	29.7874	29.724	29.717	29.6861	29.6248	29.4122	29.1852
31	29.9642	29.9115	29.7874	29.724	29.717	29.6861	29.6248	29.4122	29.1472
31	29.9642	29.9115	29.7874	29.724	29.717	29.6861	29.6248	29.4122	29.0483
31	29.9642	29.9115	29.7874	29.724	29.717	29.6861	29.6248	29.4122	28.9243
31	29.9642	29.9115	29.7874	29.724	29.717	29.6861	29.6248	29.4122	28.8568
31	29.9642	29.9115	29.7874	29.724	29.717	29.6861	29.6248	29.3639	29.306
31	29.9642	29.9115	29.7874	29.724	29.717	29.6861	29.6248	29.3639	29.1852
31	29.9642	29.9115	29.7874	29.724	29.717	29.6861	29.6248	29.3639	29.1472
31	29.9642	29.9115	29.7874	29.724	29.717	29.6861	29.6248	29.3639	29.0483
31	29.9642	29.9115	29.7874	29.724	29.717	29.6861	29.6248	29.3639	28.9243
31	29.9642	29.9115	29.7874	29.724	29.717	29.6861	29.6248	29.3591	29.306
31	29.9642	29.9115	29.7874	29.724	29.717	29.6861	29.6248	29.3591	29.1852
31	29.9642	29.9115	29.7874	29.724	29.717	29.6861	29.6248	29.3591	29.1472
31	29.9642	29.9115	29.7874	29.724	29.717	29.6861	29.6248	29.3591	29.0483
31	29.9642	29.9115	29.7874	29.724	29.717	29.6861	29.6248	29.3591	28.9243
31	29.9642	29.9115	29.7874	29.724	29.717	29.6861	29.6248	29.3418	29.306
31	29.9642	29.9115	29.7874	29.724	29.717	29.6861	29.6248	29.3418	29.1852
31	29.9642	29.9115	29.7874	29.724	29.717	29.6861	29.6248	29.3418	29.1472
31	29.9642	29.9115	29.7874	29.724	29.717	29.6861	29.6248	29.3418	29.0483
31	29.9642	29.9115	29.7874	29.724	29.717	29.6861	29.6248	29.3418	28.9243
31	29.9642	29.9115	29.7874	29.724	29.717	29.6861	29.6248	29.306	29.1852
31	29.9642	29.9115	29.7874	29.724	29.717	29.6861	29.6248	29.306	29.1472
31	29.9642	29.9115	29.7874	29.724	29.717	29.6861	29.6248	29.306	29.0483
31	29.9642	29.9115	29.7874	29.724	29.717	29.6861	29.6248	29.1852	29.1472
31	29.9642	29.9115	29.7874	29.724	29.717	29.6861	29.6248	29.1852	29.0483
31	29.9642	29.9115	29.7874	29.724	29.717	29.6861	29.6046	29.6028	29.0483
31	29.9642	29.9115	29.7874	29.724	29.717	29.6861	29.6046	29.6028	28.9243
31	29.9642	29.9115	29.7874	29.724	29.717	29.6861	29.6046	29.6028	28.8568
31	29.9642	29.9115	29.7874	29.724	29.717	29.6861	29.6046	29.6028	28.7557
31	29.9642	29.9115	29.7874	29.724	29.717	29.6861	29.6046	29.5435	29.1472
31	29.9642	29.9115	29.7874	29.724	29.717	29.6861	29.6046	29.5435	29.0483
31	29.9642	29.9115	29.7874	29.724	29.717	29.6861	29.6046	29.5435	28.9243
31	29.9642	29.9115	29.7874	29.724	29.717	29.6861	29.6046	29.5435	28.8568
31	29.9642	29.9115	29.7874	29.724	29.717	29.6861	29.6046	29.5435	28.7557
31	29.9642	29.9115	29.7874	29.724	29.717	29.6861	29.6046	29.5424	29.1472
31	29.9642	29.9115	29.7874	29.724	29.717	29.6861	29.6046	29.5424	29.0483
31	29.9642	29.9115	29.7874	29.724	29.717	29.6861	29.6046	29.5424	28.9243
31	29.9642	29.9115	29.7874	29.724	29.717	29.6861	29.6046	29.5424	28.8568
31	29.9642	29.9115	29.7874	29.724	29.717	29.6861	29.6046	29.5424	28.7557
31	29.9642	29.9115	29.7874	29.724	29.717	29.6861	29.6046	29.5326	29.1472
31	29.9642	29.9115	29.7874	29.724	29.717	29.6861	29.6046	29.5326	29.0483
31	29.9642	29.9115	29.7874	29.724	29.717	29.6861	29.6046	29.5326	28.9243
31	29.9642	29.9115	29.7874	29.724	29.717	29.6861	29.6046	29.5326	28.8568
31	29.9642	29.9115	29.7874	29.724	29.717	29.6861	29.6046	29.5326	28.7557
31	29.9642	29.9115	29.7874	29.724	29.717	29.6861	29.6046	29.5243	29.1472
31	29.9642	29.9115	29.7874	29.724	29.717	29.6861	29.6046	29.5243	29.0483
31	29.9642	29.9115	29.7874	29.724	29.717	29.6861	29.6046	29.5243	28.9243
31	29.9642	29.9115	29.7874	29.724	29.717	29.6861	29.6046	29.5243	28.8568
31	29.9642	29.9115	29.7874	29.724	29.717	29.6861	29.6046	29.5243	28.7557
31	29.9642	29.9115	29.7874	29.724	29.717	29.6861	29.6046	29.4468	29.1852
31	29.9642	29.9115	29.7874	29.724	29.717	29.6861	29.6046	29.4468	29.1472
31	29.9642	29.9115	29.7874	29.724	29.717	29.6861	29.6046	29.4468	29.0483
31	29.9642	29.9115	29.7874	29.724	29.717	29.6861	29.6046	29.4468	28.9243
31	29.9642	29.9115	29.7874	29.724	29.717	29.6861	29.6046	29.4468	28.8568
31	29.9642	29.9115	29.7874	29.724	29.717	29.6861	29.6046	29.4122	29.1852
31	29.9642	29.9115	29.7874	29.724	29.717	29.6861	29.6046	29.4122	29.1472
31	29.9642	29.9115	29.7874	29.724	29.717	29.6861	29.6046	29.4122	29.0483
31	29.9642	29.9115	29.7874	29.724	29.717	29.6861	29.6046	29.4122	28.9243
31	29.9642	29.9115	29.7874	29.724	29.717	29.6861	29.6046	29.4122	28.8568
31	29.9642	29.9115	29.7874	29.724	29.717	29.6861	29.6046	29.3639	29.306
31	29.9642	29.9115	29.7874	29.724	29.717	29.6861	29.6046	29.3639	29.1852
31	29.9642	29.9115	29.7874	29.724	29.717	29.6861	29.6046	29.3639	29.1472
31	29.9642	29.9115	29.7874	29.724	29.717	29.6861	29.6046	29.3639	29.0483
31	29.9642	29.9115	29.7874	29.724	29.717	29.6861	29.6046	29.3639	28.9243
31	29.9642	29.9115	29.7874	29.724	29.717	29.6861	29.6046	29.3591	29.306
31	29.9642	29.9115	29.7874	29.724	29.717	29.6861	29.6046	29.3591	29.1852
31	29.9642	29.9115	29.7874	29.724	29.717	29.6861	29.6046	29.3591	29.1472
31	29.9642	29.9115	29.7874	29.724	29.717	29.6861	29.6046	29.3591	29.0483
31	29.9642	29.9115	29.7874	29.724	29.717	29.6861	29.6046	29.3591	28.9243
31	29.9642	29.9115	29.7874	29.724	29.717	29.6861	29.6046	29.3418	29.306
31	29.9642	29.9115	29.7874	29.724	29.717	29.6861	29.6046	29.3418	29.1852
31	29.9642	29.9115	29.7874	29.724	29.717	29.6861	29.6046	29.3418	29.1472
31	29.9642	29.9115	29.7874	29.724	29.717	29.6861	29.6046	29.3418	29.0483
31	29.9642	29.9115	29.7874	29.724	29.717	29.6861	29.6046	29.3418	28.9243
31	29.9642	29.9115	29.7874	29.724	29.717	29.6861	29.6046	29.306	29.1852
31	29.9642	29.9115	29.7874	29.724	29.717	29.6861	29.6046	29.306	29.1472
31	29.9642	29.9115	29.7874	29.724	29.717	29.6861	29.6046	29.306	29.0483
31	29.9642	29.9115	29.7874	29.724	29.717	29.6861	29.6046	29.1852	29.1472
31	29.9642	29.9115	29.7874	29.724	29.717	29.6861	29.6028	29.5435	29.1472
31	29.9642	29.9115	29.7874	29.724	29.717	29.6861	29.6028	29.5435	29.0483
31	29.9642	29.9115	29.7874	29.724	29.717	29.6861	29.6028	29.5435	28.9243
31	29.9642	29.9115	29.7874	29.724	29.717	29.6861	29.6028	29.5435	28.8568
31	29.9642	29.9115	29.7874	29.724	29.717	29.6861	29.6028	29.5435	28.7557
31	29.9642	29.9115	29.7874	29.724	29.717	29.6861	29.6028	29.5424	29.1472
31	29.9642	29.9115	29.7874	29.724	29.717	29.6861	29.6028	29.5424	29.0483
31	29.9642	29.9115	29.7874	29.724	29.717	29.6861	29.6028	29.5424	28.9243
31	29.9642	29.9115	29.7874	29.724	29.717	29.6861	29.6028	29.5424	28.8568
31	29.9642	29.9115	29.7874	29.724	29.717	29.6861	29.6028	29.5424	28.7557
31	29.9642	29.9115	29.7874	29.724	29.717	29.6861	29.6028	29.5326	29.1472
31	29.9642	29.9115	29.7874	29.724	29.717	29.6861	29.6028	29.5326	29.0483
31	29.9642	29.9115	29.7874	29.724	29.717	29.6861	29.6028	29.5326	28.9243
31	29.9642	29.9115	29.7874	29.724	29.717	29.6861	29.6028	29.5326	28.8568
31	29.9642	29.9115	29.7874	29.724	29.717	29.6861	29.6028	29.5326	28.7557
31	29.9642	29.9115	29.7874	29.724	29.717	29.6861	29.6028	29.5243	29.1472
31	29.9642	29.9115	29.7874	29.724	29.717	29.6861	29.6028	29.5243	29.0483
31	29.9642	29.9115	29.7874	29.724	29.717	29.6861	29.6028	29.5243	28.9243
31	29.9642	29.9115	29.7874	29.724	29.717	29.6861	29.6028	29.5243	28.8568
31	29.9642	29.9115	29.7874	29.724	29.717	29.6861	29.6028	29.5243	28.7557
31	29.9642	29.9115	29.7874	29.724	29.717	29.6861	29.6028	29.4468	29.1852
31	29.9642	29.9115	29.7874	29.724	29.717	29.6861	29.6028	29.4468	29.1472
31	29.9642	29.9115	29.7874	29.724	29.717	29.6861	29.6028	29.4468	29.0483
31	29.9642	29.9115	29.7874	29.724	29.717	29.6861	29.6028	29.4468	28.9243
31	29.9642	29.9115	29.7874	29.724	29.717	29.6861	29.6028	29.4468	28.8568
31	29.9642	29.9115	29.7874	29.724	29.717	29.6861	29.6028	29.4122	29.1852
31	29.9642	29.9115	29.7874	29.724	29.717	29.6861	29.6028	29.4122	29.1472
31	29.9642	29.9115	29.7874	29.724	29.717	29.6861	29.6028	29.4122	29.0483
31	29.9642	29.9115	29.7874	29.724	29.717	29.6861	29.6028	29.4122	28.9243
31	29.9642	29.9115	29.7874	29.724	29.717	29.6861	29.6028	29.4122	28.8568
31	29.9642	29.9115	29.7874	29.724	29.717	29.6861	29.6028	29.3639	29.306
31	29.9642	29.9115	29.7874	29.724	29.717	29.6861	29.6028	29.3639	29.1852
31	29.9642	29.9115	29.7874	29.724	29.717	29.6861	29.6028	29.3639	29.1472
31	29.9642	29.9115	29.7874	29.724	29.717	29.6861	29.6028	29.3639	29.0483
31	29.9642	29.9115	29.7874	29.724	29.717	29.6861	29.6028	29.3639	28.9243
31	29.9642	29.9115	29.7874	29.724	29.717	29.6861	29.6028	29.3591	29.306
31	29.9642	29.9115	29.7874	29.724	29.717	29.6861	29.6028	29.3591	29.1852
31	29.9642	29.9115	29.7874	29.724	29.717	29.6861	29.6028	29.3591	29.1472
31	29.9642	29.9115	29.7874	29.724	29.717	29.6861	29.6028	29.3591	29.0483
31	29.9642	29.9115	29.7874	29.724	29.717	29.6861	29.6028	29.3591	28.9243
31	29.9642	29.9115	29.7874	29.724	29.717	29.6861	29.6028	29.3418	29.306
31	29.9642	29.9115	29.7874	29.724	29.717	29.6861	29.6028	29.3418	29.1852
31	29.9642	29.9115	29.7874	29.724	29.717	29.6861	29.6028	29.3418	29.1472
31	29.9642	29.9115	29.7874	29.724	29.717	29.6861	29.6028	29.3418	29.0483
31	29.9642	29.9115	29.7874	29.724	29.717	29.6861	29.6028	29.3418	28.9243
31	29.9642	29.9115	29.7874	29.724	29.717	29.6861	29.6028	29.306	29.1852
31	29.9642	29.9115	29.7874	29.724	29.717	29.6861	29.6028	29.306	29.1472
31	29.9642	29.9115	29.7874	29.724	29.717	29.6861	29.6028	29.306	29.0483
31	29.9642	29.9115	29.7874	29.724	29.717	29.6861	29.6028	29.1852	29.1472
31	29.9642	29.9115	29.7874	29.724	29.717	29.6861	29.5435	29.5424	29.1852
31	29.9642	29.9115	29.7874	29.724	29.717	29.6861	29.5435	29.5424	29.1472
31	29.9642	29.9115	29.7874	29.724	29.717	29.6861	29.5435	29.5424	29.0483
31	29.9642	29.9115	29.7874	29.724	29.717	29.6861	29.5435	29.5424	28.9243
31	29.9642	29.9115	29.7874	29.724	29.717	29.6861	29.5435	29.5424	28.8568
31	29.9642	29.9115	29.7874	29.724	29.717	29.6861	29.5435	29.5326	29.1852
31	29.9642	29.9115	29.7874	29.724	29.717	29.6861	29.5435	29.5326	29.1472
31	29.9642	29.9115	29.7874	29.724	29.717	29.6861	29.5435	29.5326	29.0483
31	29.9642	29.9115	29.7874	29.724	29.717	29.6861	29.5435	29.5326	28.9243
31	29.9642	29.9115	29.7874	29.724	29.717	29.6861	29.5435	29.5326	28.8568
31	29.9642	29.9115	29.7874	29.724	29.717	29.6861	29.5435	29.5243	29.1852
31	29.9642	29.9115	29.7874	29.724	29.717	29.6861	29.5435	29.5243	29.1472
31	29.9642	29.9115	29.7874	29.724	29.717	29.6861	29.5435	29.5243	29.0483
31	29.9642	29.9115	29.7874	29.724	29.717	29.6861	29.5435	29.5243	28.9243
31	29.9642	29.9115	29.7874	29.724	29.717	29.6861	29.5435	29.5243	28.8568
31	29.9642	29.9115	29.7874	29.724	29.717	29.6861	29.5435	29.4468	29.306
31	29.9642	29.9115	29.7874	29.724	29.717	29.6861	29.5435	29.4468	29.1852
31	29.9642	29.9115	29.7874	29.724	29.717	29.6861	29.5435	29.4468	29.1472
31	29.9642	29.9115	29.7874	29.724	29.717	29.6861	29.5435	29.4468	29.0483
31	29.9642	29.9115	29.7874	29.724	29.717	29.6861	29.5435	29.4468	28.9243
31	29.9642	29.9115	29.7874	29.724	29.717	29.6861	29.5435	29.4122	29.3418
31	29.9642	29.9115	29.7874	29.724	29.717	29.6861	29.5435	29.4122	29.306
31	29.9642	29.9115	29.7874	29.724	29.717	29.6861	29.5435	29.4122	29.1852
31	29.9642	29.9115	29.7874	29.724	29.717	29.6861	29.5435	29.4122	29.1472
31	29.9642	29.9115	29.7874	29.724	29.717	29.6861	29.5435	29.4122	29.0483
31	29.9642	29.9115	29.7874	29.724	29.717	29.6861	29.5435	29.4122	28.9243
31	29.9642	29.9115	29.7874	29.724	29.717	29.6861	29.5435	29.3639	29.3591
31	29.9642	29.9115	29.7874	29.724	29.717	29.6861	29.5435	29.3639	29.3418
31	29.9642	29.9115	29.7874	29.724	29.717	29.6861	29.5435	29.3639	29.306
31	29.9642	29.9115	29.7874	29.724	29.717	29.6861	29.5435	29.3639	29.1852
31	29.9642	29.9115	29.7874	29.724	29.717	29.6861	29.5435	29.3639	29.1472
31	29.9642	29.9115	29.7874	29.724	29.717	29.6861	29.5435	29.3639	29.0483
31	29.9642	29.9115	29.7874	29.724	29.717	29.6861	29.5435	29.3591	29.3418
31	29.9642	29.9115	29.7874	29.724	29.717	29.6861	29.5435	29.3591	29.306
31	29.9642	29.9115	29.7874	29.724	29.717	29.6861	29.5435	29.3591	29.1852
31	29.9642	29.9115	29.7874	29.724	29.717	29.6861	29.5435	29.3591	29.1472
31	29.9642	29.9115	29.7874	29.724	29.717	29.6861	29.5435	29.3591	29.0483
31	29.9642	29.9115	29.7874	29.724	29.717	29.6861	29.5435	29.3418	29.306
31	29.9642	29.9115	29.7874	29.724	29.717	29.6861	29.5435	29.3418	29.1852
31	29.9642	29.9115	29.7874	29.724	29.717	29.6861	29.5435	29.3418	29.1472
31	29.9642	29.9115	29.7874	29.724	29.717	29.6861	29.5435	29.3418	29.0483
31	29.9642	29.9115	29.7874	29.724	29.717	29.6861	29.5435	29.306	29.1852
31	29.9642	29.9115	29.7874	29.724	29.717	29.6861	29.5435	29.306	29.1472
31	29.9642	29.9115	29.7874	29.724	29.717	29.6861	29.5435	29.306	29.0483
31	29.9642	29.9115	29.7874	29.724	29.717	29.6861	29.5435	29.1852	29.1472
31	29.9642	29.9115	29.7874	29.724	29.717	29.6861	29.5424	29.5326	29.1852
31	29.9642	29.9115	29.7874	29.724	29.717	29.6861	29.5424	29.5326	29.1472
31	29.9642	29.9115	29.7874	29.724	29.717	29.6861	29.5424	29.5326	29.0483
31	29.9642	29.9115	29.7874	29.724	29.717	29.6861	29.5424	29.5326	28.9243
31	29.9642	29.9115	29.7874	29.724	29.717	29.6861	29.5424	29.5326	28.8568
31	29.9642	29.9115	29.7874	29.724	29.717	29.6861	29.5424	29.5243	29.1852
31	29.9642	29.9115	29.7874	29.724	29.717	29.6861	29.5424	29.5243	29.1472
31	29.9642	29.9115	29.7874	29.724	29.717	29.6861	29.5424	29.5243	29.0483
31	29.9642	29.9115	29.7874	29.724	29.717	29.6861	29.5424	29.5243	28.9243
31	29.9642	29.9115	29.7874	29.724	29.717	29.6861	29.5424	29.5243	28.8568
31	29.9642	29.9115	29.7874	29.724	29.717	29.6861	29.5424	29.4468	29.306
31	29.9642	29.9115	29.7874	29.724	29.717	29.6861	29.5424	29.4468	29.1852
31	29.9642	29.9115	29.7874	29.724	29.717	29.6861	29.5424	29.4468	29.1472
31	29.9642	29.9115	29.7874	29.724	29.717	29.6861	29.5424	29.4468	29.0483
31	29.9642	29.9115	29.7874	29.724	29.717	29.6861	29.5424	29.4468	28.9243
31	29.9642	29.9115	29.7874	29.724	29.717	29.6861	29.5424	29.4122	29.3418
31	29.9642	29.9115	29.7874	29.724	29.717	29.6861	29.5424	29.4122	29.306
31	29.9642	29.9115	29.7874	29.724	29.717	29.6861	29.5424	29.4122	29.1852
31	29.9642	29.9115	29.7874	29.724	29.717	29.6861	29.5424	29.4122	29.1472
31	29.9642	29.9115	29.7874	29.724	29.717	29.6861	29.5424	29.4122	29.0483
31	29.9642	29.9115	29.7874	29.724	29.717	29.6861	29.5424	29.4122	28.9243
31	29.9642	29.9115	29.7874	29.724	29.717	29.6861	29.5424	29.3639	29.3591
31	29.9642	29.9115	29.7874	29.724	29.717	29.6861	29.5424	29.3639	29.3418
31	29.9642	29.9115	29.7874	29.724	29.717	29.6861	29.5424	29.3639	29.306
31	29.9642	29.9115	29.7874	29.724	29.717	29.6861	29.5424	29.3639	29.1852
31	29.9642	29.9115	29.7874	29.724	29.717	29.6861	29.5424	29.3639	29.1472
31	29.9642	29.9115	29.7874	29.724	29.717	29.6861	29.5424	29.3639	29.0483
31	29.9642	29.9115	29.7874	29.724	29.717	29.6861	29.5424	29.3591	29.3418
31	29.9642	29.9115	29.7874	29.724	29.717	29.6861	29.5424	29.3591	29.306
31	29.9642	29.9115	29.7874	29.724	29.717	29.6861	29.5424	29.3591	29.1852
31	29.9642	29.9115	29.7874	29.724	29.717	29.6861	29.5424	29.3591	29.1472
31	29.9642	29.9115	29.7874	29.724	29.717	29.6861	29.5424	29.3591	29.0483
31	29.9642	29.9115	29.7874	29.724	29.717	29.6861	29.5424	29.3418	29.306
31	29.9642	29.9115	29.7874	29.724	29.717	29.6861	29.5424	29.3418	29.1852
31	29.9642	29.9115	29.7874	29.724	29.717	29.6861	29.5424	29.3418	29.1472
31	29.9642	29.9115	29.7874	29.724	29.717	29.6861	29.5424	29.3418	29.0483
31	29.9642	29.9115	29.7874	29.724	29.717	29.6861	29.5424	29.306	29.1852
31	29.9642	29.9115	29.7874	29.724	29.717	29.6861	29.5424	29.306	29.1472
31	29.9642	29.9115	29.7874	29.724	29.717	29.6861	29.5424	29.306	29.0483
31	29.9642	29.9115	29.7874	29.724	29.717	29.6861	29.5424	29.1852	29.1472
31	29.9642	29.9115	29.7874	29.724	29.717	29.6861	29.5326	29.5243	29.1852
31	29.9642	29.9115	29.7874	29.724	29.717	29.6861	29.5326	29.5243	29.1472
31	29.9642	29.9115	29.7874	29.724	29.717	29.6861	29.5326	29.5243	29.0483
31	29.9642	29.9115	29.7874	29.724	29.717	29.6861	29.5326	29.5243	28.9243
31	29.9642	29.9115	29.7874	29.724	29.717	29.6861	29.5326	29.5243	28.8568
31	29.9642	29.9115	29.7874	29.724	29.717	29.6861	29.5326	29.4468	29.306
31	29.9642	29.9115	29.7874	29.724	29.717	29.6861	29.5326	29.4468	29.1852
31	29.9642	29.9115	29.7874	29.724	29.717	29.6861	29.5326	29.4468	29.1472
31	29.9642	29.9115	29.7874	29.724	29.717	29.6861	29.5326	29.4468	29.0483
31	29.9642	29.9115	29.7874	29.724	29.717	29.6861	29.5326	29.4468	28.9243
31	29.9642	29.9115	29.7874	29.724	29.717	29.6861	29.5326	29.4122	29.3418
31	29.9642	29.9115	29.7874	29.724	29.717	29.6861	29.5326	29.4122	29.306
31	29.9642	29.9115	29.7874	29.724	29.717	29.6861	29.5326	29.4122	29.1852
31	29.9642	29.9115	29.7874	29.724	29.717	29.6861	29.5326	29.4122	29.1472
31	29.9642	29.9115	29.7874	29.724	29.717	29.6861	29.5326	29.4122	29.0483
31	29.9642	29.9115	29.7874	29.724	29.717	29.6861	29.5326	29.4122	28.9243
31	29.9642	29.9115	29.7874	29.724	29.717	29.6861	29.5326	29.3639	29.3591
31	29.9642	29.9115	29.7874	29.724	29.717	29.6861	29.5326	29.3639	29.3418
31	29.9642	29.9115	29.7874	29.724	29.717	29.6861	29.5326	29.3639	29.306
31	29.9642	29.9115	29.7874	29.724	29.717	29.6861	29.5326	29.3639	29.1852
31	29.9642	29.9115	29.7874	29.724	29.717	29.6861	29.5326	29.3639	29.1472
31	29.9642	29.9115	29.7874	29.724	29.717	29.6861	29.5326	29.3639	29.0483
31	29.9642	29.9115	29.7874	29.724	29.717	29.6861	29.5326	29.3591	29.3418
31	29.9642	29.9115	29.7874	29.724	29.717	29.6861	29.5326	29.3591	29.306
31	29.9642	29.9115	29.7874	29.724	29.717	29.6861	29.5326	29.3591	29.1852
31	29.9642	29.9115	29.7874	29.724	29.717	29.6861	29.5326	29.3591	29.1472
31	29.9642	29.9115	29.7874	29.724	29.717	29.6861	29.5326	29.3591	29.0483
31	29.9642	29.9115	29.7874	29.724	29.717	29.6861	29.5326	29.3418	29.306
31	29.9642	29.9115	29.7874	29.724	29.717	29.6861	29.5326	29.3418	29.1852
31	29.9642	29.9115	29.7874	29.724	29.717	29.6861	29.5326	29.3418	29.1472
31	29.9642	29.9115	29.7874	29.724	29.717	29.6861	29.5326	29.3418	29.0483
31	29.9642	29.9115	29.7874	29.724	29.717	29.6861	29.5326	29.306	29.1852
31	29.9642	29.9115	29.7874	29.724	29.717	29.6861	29.5326	29.306	29.1472
31	29.9642	29.9115	29.7874	29.724	29.717	29.6861	29.5326	29.306	29.0483
31	29.9642	29.9115	29.7874	29.724	29.717	29.6861	29.5326	29.1852	29.1472
31	29.9642	29.9115	29.7874	29.724	29.717	29.6861	29.5243	29.4468	29.306
31	29.9642	29.9115	29.7874	29.724	29.717	29.6861	29.5243	29.4468	29.1852
31	29.9642	29.9115	29.7874	29.724	29.717	29.6861	29.5243	29.4468	29.1472
31	29.9642	29.9115	29.7874	29.724	29.717	29.6861	29.5243	29.4468	29.0483
31	29.9642	29.9115	29.7874	29.724	29.717	29.6861	29.5243	29.4468	28.9243
31	29.9642	29.9115	29.7874	29.724	29.717	29.6861	29.5243	29.4122	29.3591
31	29.9642	29.9115	29.7874	29.724	29.717	29.6861	29.5243	29.4122	29.3418
31	29.9642	29.9115	29.7874	29.724	29.717	29.6861	29.5243	29.4122	29.306
31	29.9642	29.9115	29.7874	29.724	29.717	29.6861	29.5243	29.4122	29.1852
31	29.9642	29.9115	29.7874	29.724	29.717	29.6861	29.5243	29.4122	29.1472
31	29.9642	29.9115	29.7874	29.724	29.717	29.6861	29.5243	29.4122	29.0483
31	29.9642	29.9115	29.7874	29.724	29.717	29.6861	29.5243	29.4122	28.9243
31	29.9642	29.9115	29.7874	29.724	29.717	29.6861	29.5243	29.3639	29.3591
31	29.9642	29.9115	29.7874	29.724	29.717	29.6861	29.5243	29.3639	29.3418
31	29.9642	29.9115	29.7874	29.724	29.717	29.6861	29.5243	29.3639	29.306
31	29.9642	29.9115	29.7874	29.724	29.717	29.6861	29.5243	29.3639	29.1852
31	29.9642	29.9115	29.7874	29.724	29.717	29.6861	29.5243	29.3639	29.1472
31	29.9642	29.9115	29.7874	29.724	29.717	29.6861	29.5243	29.3639	29.0483
31	29.9642	29.9115	29.7874	29.724	29.717	29.6861	29.5243	29.3591	29.3418
31	29.9642	29.9115	29.7874	29.724	29.717	29.6861	29.5243	29.3591	29.306
31	29.9642	29.9115	29.7874	29.724	29.717	29.6861	29.5243	29.3591	29.1852
31	29.9642	29.9115	29.7874	29.724	29.717	29.6861	29.5243	29.3591	29.1472
31	29.9642	29.9115	29.7874	29.724	29.717	29.6861	29.5243	29.3591	29.0483
31	29.9642	29.9115	29.7874	29.724	29.717	29.6861	29.5243	29.3418	29.306
31	29.9642	29.9115	29.7874	29.724	29.717	29.6861	29.5243	29.3418	29.1852
31	29.9642	29.9115	29.7874	29.724	29.717	29.6861	29.5243	29.3418	29.1472
31	29.9642	29.9115	29.7874	29.724	29.717	29.6861	29.5243	29.3418	29.0483
31	29.9642	29.9115	29.7874	29.724	29.717	29.6861	29.5243	29.306	29.1852
31	29.9642	29.9115	29.7874	29.724	29.717	29.6861	29.5243	29.306	29.1472
31	29.9642	29.9115	29.7874	29.724	29.717	29.6861	29.5243	29.306	29.0483
31	29.9642	29.9115	29.7874	29.724	29.717	29.6861	29.4468	29.4122	29.3639
31	29.9642	29.9115	29.7874	29.724	29.717	29.6861	29.4468	29.4122	29.3591
31	29.9642	29.9115	29.7874	29.724	29.717	29.6861	29.4468	29.4122	29.3418
31	29.9642	29.9115	29.7874	29.724	29.717	29.6861	29.4468	29.4122	29.306
31	29.9642	29.9115	29.7874	29.724	29.717	29.6861	29.4468	29.4122	29.1852
31	29.9642	29.9115	29.7874	29.724	29.717	29.6861	29.4468	29.4122	29.1472
31	29.9642	29.9115	29.7874	29.724	29.717	29.6861	29.4468	29.4122	29.0483
31	29.9642	29.9115	29.7874	29.724	29.717	29.6861	29.4468	29.3639	29.3591
31	29.9642	29.9115	29.7874	29.724	29.717	29.6861	29.4468	29.3639	29.3418
31	29.9642	29.9115	29.7874	29.724	29.717	29.6861	29.4468	29.3639	29.306
31	29.9642	29.9115	29.7874	29.724	29.717	29.6861	29.4468	29.3639	29.1852
31	29.9642	29.9115	29.7874	29.724	29.717	29.6861	29.4468	29.3639	29.1472
31	29.9642	29.9115	29.7874	29.724	29.717	29.6861	29.4468	29.3639	29.0483
31	29.9642	29.9115	29.7874	29.724	29.717	29.6861	29.4468	29.3591	29.3418
31	29.9642	29.9115	29.7874	29.724	29.717	29.6861	29.4468	29.3591	29.306
31	29.9642	29.9115	29.7874	29.724	29.717	29.6861	29.4468	29.3591	29.1852
31	29.9642	29.9115	29.7874	29.724	29.717	29.6861	29.4468	29.3591	29.1472
31	29.9642	29.9115	29.7874	29.724	29.717	29.6861	29.4468	29.3418	29.306
31	29.9642	29.9115	29.7874	29.724	29.717	29.6861	29.4468	29.3418	29.1852
31	29.9642	29.9115	29.7874	29.724	29.717	29.6861	29.4468	29.3418	29.1472
31	29.9642	29.9115	29.7874	29.724	29.717	29.6861	29.4468	29.306	29.1852
31	29.9642	29.9115	29.7874	29.724	29.717	29.6861	29.4468	29.306	29.1472
31	29.9642	29.9115	29.7874	29.724	29.717	29.6861	29.4122	29.3639	29.3591
31	29.9642	29.9115	29.7874	29.724	29.717	29.6861	29.4122	29.3639	29.3418
31	29.9642	29.9115	29.7874	29.724	29.717	29.6861	29.4122	29.3639	29.306
31	29.9642	29.9115	29.7874	29.724	29.717	29.6861	29.4122	29.3639	29.1852
31	29.9642	29.9115	29.7874	29.724	29.717	29.6861	29.4122	29.3639	29.1472
31	29.9642	29.9115	29.7874	29.724	29.717	29.6861	29.4122	29.3591	29.3418
31	29.9642	29.9115	29.7874	29.724	29.717	29.6861	29.4122	29.3591	29.306
31	29.9642	29.9115	29.7874	29.724	29.717	29.6861	29.4122	29.3591	29.1852
31	29.9642	29.9115	29.7874	29.724	29.717	29.6861	29.4122	29.3591	29.1472
31	29.9642	29.9115	29.7874	29.724	29.717	29.6861	29.4122	29.3418	29.306
31	29.9642	29.9115	29.7874	29.724	29.717	29.6861	29.4122	29.3418	29.1852
31	29.9642	29.9115	29.7874	29.724	29.717	29.6861	29.4122	29.3418	29.1472
31	29.9642	29.9115	29.7874	29.724	29.717	29.6861	29.4122	29.306	29.1852
31	29.9642	29.9115	29.7874	29.724	29.717	29.6861	29.4122	29.306	29.1472
31	29.9642	29.9115	29.7874	29.724	29.717	29.6861	29.3639	29.3591	29.3418
31	29.9642	29.9115	29.7874	29.724	29.717	29.6861	29.3639	29.3591	29.306
31	29.9642	29.9115	29.7874	29.724	29.717	29.6861	29.3639	29.3591	29.1852
31	29.9642	29.9115	29.7874	29.724	29.717	29.6861	29.3639	29.3591	29.1472
31	29.9642	29.9115	29.7874	29.724	29.717	29.6861	29.3639	29.3418	29.306
31	29.9642	29.9115	29.7874	29.724	29.717	29.6861	29.3639	29.3418	29.1852
31	29.9642	29.9115	29.7874	29.724	29.717	29.6861	29.3591	29.3418	29.306
31	29.9642	29.9115	29.7874	29.724	29.717	29.6861	29.3591	29.3418	29.1852
31	29.9642	29.9115	29.7874	29.724	29.717	29.6744	29.6396	29.6248	28.9243
31	29.9642	29.9115	29.7874	29.724	29.717	29.6744	29.6396	29.6248	28.8568
31	29.9642	29.9115	29.7874	29.724	29.717	29.6744	29.6396	29.6248	28.7557
31	29.9642	29.9115	29.7874	29.724	29.717	29.6744	29.6396	29.6046	29.0483
31	29.9642	29.9115	29.7874	29.724	29.717	29.6744	29.6396	29.6046	28.9243
31	29.9642	29.9115	29.7874	29.724	29.717	29.6744	29.6396	29.6046	28.8568
31	29.9642	29.9115	29.7874	29.724	29.717	29.6744	29.6396	29.6046	28.7557
31	29.9642	29.9115	29.7874	29.724	29.717	29.6744	29.6396	29.6028	29.0483
31	29.9642	29.9115	29.7874	29.724	29.717	29.6744	29.6396	29.6028	28.9243
31	29.9642	29.9115	29.7874	29.724	29.717	29.6744	29.6396	29.6028	28.8568
31	29.9642	29.9115	29.7874	29.724	29.717	29.6744	29.6396	29.6028	28.7557
31	29.9642	29.9115	29.7874	29.724	29.717	29.6744	29.6396	29.5435	29.0483
31	29.9642	29.9115	29.7874	29.724	29.717	29.6744	29.6396	29.5435	28.9243
31	29.9642	29.9115	29.7874	29.724	29.717	29.6744	29.6396	29.5435	28.8568
31	29.9642	29.9115	29.7874	29.724	29.717	29.6744	29.6396	29.5435	28.7557
31	29.9642	29.9115	29.7874	29.724	29.717	29.6744	29.6396	29.5424	29.0483
31	29.9642	29.9115	29.7874	29.724	29.717	29.6744	29.6396	29.5424	28.9243
31	29.9642	29.9115	29.7874	29.724	29.717	29.6744	29.6396	29.5424	28.8568
31	29.9642	29.9115	29.7874	29.724	29.717	29.6744	29.6396	29.5424	28.7557
31	29.9642	29.9115	29.7874	29.724	29.717	29.6744	29.6396	29.5326	29.0483
31	29.9642	29.9115	29.7874	29.724	29.717	29.6744	29.6396	29.5326	28.9243
31	29.9642	29.9115	29.7874	29.724	29.717	29.6744	29.6396	29.5326	28.8568
31	29.9642	29.9115	29.7874	29.724	29.717	29.6744	29.6396	29.5326	28.7557
31	29.9642	29.9115	29.7874	29.724	29.717	29.6744	29.6396	29.5243	29.0483
31	29.9642	29.9115	29.7874	29.724	29.717	29.6744	29.6396	29.5243	28.9243
31	29.9642	29.9115	29.7874	29.724	29.717	29.6744	29.6396	29.5243	28.8568
31	29.9642	29.9115	29.7874	29.724	29.717	29.6744	29.6396	29.5243	28.7557
31	29.9642	29.9115	29.7874	29.724	29.717	29.6744	29.6396	29.4468	29.1852
31	29.9642	29.9115	29.7874	29.724	29.717	29.6744	29.6396	29.4468	29.1472
31	29.9642	29.9115	29.7874	29.724	29.717	29.6744	29.6396	29.4468	29.0483
31	29.9642	29.9115	29.7874	29.724	29.717	29.6744	29.6396	29.4468	28.9243
31	29.9642	29.9115	29.7874	29.724	29.717	29.6744	29.6396	29.4468	28.8568
31	29.9642	29.9115	29.7874	29.724	29.717	29.6744	29.6396	29.4122	29.1852
31	29.9642	29.9115	29.7874	29.724	29.717	29.6744	29.6396	29.4122	29.1472
31	29.9642	29.9115	29.7874	29.724	29.717	29.6744	29.6396	29.4122	29.0483
31	29.9642	29.9115	29.7874	29.724	29.717	29.6744	29.6396	29.4122	28.9243
31	29.9642	29.9115	29.7874	29.724	29.717	29.6744	29.6396	29.4122	28.8568
31	29.9642	29.9115	29.7874	29.724	29.717	29.6744	29.6396	29.3639	29.1852
31	29.9642	29.9115	29.7874	29.724	29.717	29.6744	29.6396	29.3639	29.1472
31	29.9642	29.9115	29.7874	29.724	29.717	29.6744	29.6396	29.3639	29.0483
31	29.9642	29.9115	29.7874	29.724	29.717	29.6744	29.6396	29.3639	28.9243
31	29.9642	29.9115	29.7874	29.724	29.717	29.6744	29.6396	29.3591	29.306
31	29.9642	29.9115	29.7874	29.724	29.717	29.6744	29.6396	29.3591	29.1852
31	29.9642	29.9115	29.7874	29.724	29.717	29.6744	29.6396	29.3591	29.1472
31	29.9642	29.9115	29.7874	29.724	29.717	29.6744	29.6396	29.3591	29.0483
31	29.9642	29.9115	29.7874	29.724	29.717	29.6744	29.6396	29.3591	28.9243
31	29.9642	29.9115	29.7874	29.724	29.717	29.6744	29.6396	29.3418	29.306
31	29.9642	29.9115	29.7874	29.724	29.717	29.6744	29.6396	29.3418	29.1852
31	29.9642	29.9115	29.7874	29.724	29.717	29.6744	29.6396	29.3418	29.1472
31	29.9642	29.9115	29.7874	29.724	29.717	29.6744	29.6396	29.3418	29.0483
31	29.9642	29.9115	29.7874	29.724	29.717	29.6744	29.6396	29.3418	28.9243
31	29.9642	29.9115	29.7874	29.724	29.717	29.6744	29.6396	29.306	29.1852
31	29.9642	29.9115	29.7874	29.724	29.717	29.6744	29.6396	29.306	29.1472
31	29.9642	29.9115	29.7874	29.724	29.717	29.6744	29.6396	29.306	29.0483
31	29.9642	29.9115	29.7874	29.724	29.717	29.6744	29.6396	29.306	28.9243
31	29.9642	29.9115	29.7874	29.724	29.717	29.6744	29.6396	29.1852	29.1472
31	29.9642	29.9115	29.7874	29.724	29.717	29.6744	29.6396	29.1852	29.0483
31	29.9642	29.9115	29.7874	29.724	29.717	29.6744	29.6248	29.6046	29.0483
31	29.9642	29.9115	29.7874	29.724	29.717	29.6744	29.6248	29.6046	28.9243
31	29.9642	29.9115	29.7874	29.724	29.717	29.6744	29.6248	29.6046	28.8568
31	29.9642	29.9115	29.7874	29.724	29.717	29.6744	29.6248	29.6046	28.7557
31	29.9642	29.9115	29.7874	29.724	29.717	29.6744	29.6248	29.6028	29.0483
31	29.9642	29.9115	29.7874	29.724	29.717	29.6744	29.6248	29.6028	28.9243
31	29.9642	29.9115	29.7874	29.724	29.717	29.6744	29.6248	29.6028	28.8568
31	29.9642	29.9115	29.7874	29.724	29.717	29.6744	29.6248	29.6028	28.7557
31	29.9642	29.9115	29.7874	29.724	29.717	29.6744	29.6248	29.5435	29.0483
31	29.9642	29.9115	29.7874	29.724	29.717	29.6744	29.6248	29.5435	28.9243
31	29.9642	29.9115	29.7874	29.724	29.717	29.6744	29.6248	29.5435	28.8568
31	29.9642	29.9115	29.7874	29.724	29.717	29.6744	29.6248	29.5435	28.7557
31	29.9642	29.9115	29.7874	29.724	29.717	29.6744	29.6248	29.5424	29.0483
31	29.9642	29.9115	29.7874	29.724	29.717	29.6744	29.6248	29.5424	28.9243
31	29.9642	29.9115	29.7874	29.724	29.717	29.6744	29.6248	29.5424	28.8568
31	29.9642	29.9115	29.7874	29.724	29.717	29.6744	29.6248	29.5424	28.7557
31	29.9642	29.9115	29.7874	29.724	29.717	29.6744	29.6248	29.5326	29.1472
31	29.9642	29.9115	29.7874	29.724	29.717	29.6744	29.6248	29.5326	29.0483
31	29.9642	29.9115	29.7874	29.724	29.717	29.6744	29.6248	29.5326	28.9243
31	29.9642	29.9115	29.7874	29.724	29.717	29.6744	29.6248	29.5326	28.8568
31	29.9642	29.9115	29.7874	29.724	29.717	29.6744	29.6248	29.5326	28.7557
31	29.9642	29.9115	29.7874	29.724	29.717	29.6744	29.6248	29.5243	29.1472
31	29.9642	29.9115	29.7874	29.724	29.717	29.6744	29.6248	29.5243	29.0483
31	29.9642	29.9115	29.7874	29.724	29.717	29.6744	29.6248	29.5243	28.9243
31	29.9642	29.9115	29.7874	29.724	29.717	29.6744	29.6248	29.5243	28.8568
31	29.9642	29.9115	29.7874	29.724	29.717	29.6744	29.6248	29.5243	28.7557
31	29.9642	29.9115	29.7874	29.724	29.717	29.6744	29.6248	29.4468	29.1852
31	29.9642	29.9115	29.7874	29.724	29.717	29.6744	29.6248	29.4468	29.1472
31	29.9642	29.9115	29.7874	29.724	29.717	29.6744	29.6248	29.4468	29.0483
31	29.9642	29.9115	29.7874	29.724	29.717	29.6744	29.6248	29.4468	28.9243
31	29.9642	29.9115	29.7874	29.724	29.717	29.6744	29.6248	29.4468	28.8568
31	29.9642	29.9115	29.7874	29.724	29.717	29.6744	29.6248	29.4122	29.1852
31	29.9642	29.9115	29.7874	29.724	29.717	29.6744	29.6248	29.4122	29.1472
31	29.9642	29.9115	29.7874	29.724	29.717	29.6744	29.6248	29.4122	29.0483
31	29.9642	29.9115	29.7874	29.724	29.717	29.6744	29.6248	29.4122	28.9243
31	29.9642	29.9115	29.7874	29.724	29.717	29.6744	29.6248	29.4122	28.8568
31	29.9642	29.9115	29.7874	29.724	29.717	29.6744	29.6248	29.3639	29.306
31	29.9642	29.9115	29.7874	29.724	29.717	29.6744	29.6248	29.3639	29.1852
31	29.9642	29.9115	29.7874	29.724	29.717	29.6744	29.6248	29.3639	29.1472
31	29.9642	29.9115	29.7874	29.724	29.717	29.6744	29.6248	29.3639	29.0483
31	29.9642	29.9115	29.7874	29.724	29.717	29.6744	29.6248	29.3639	28.9243
31	29.9642	29.9115	29.7874	29.724	29.717	29.6744	29.6248	29.3591	29.306
31	29.9642	29.9115	29.7874	29.724	29.717	29.6744	29.6248	29.3591	29.1852
31	29.9642	29.9115	29.7874	29.724	29.717	29.6744	29.6248	29.3591	29.1472
31	29.9642	29.9115	29.7874	29.724	29.717	29.6744	29.6248	29.3591	29.0483
31	29.9642	29.9115	29.7874	29.724	29.717	29.6744	29.6248	29.3591	28.9243
31	29.9642	29.9115	29.7874	29.724	29.717	29.6744	29.6248	29.3418	29.306
31	29.9642	29.9115	29.7874	29.724	29.717	29.6744	29.6248	29.3418	29.1852
31	29.9642	29.9115	29.7874	29.724	29.717	29.6744	29.6248	29.3418	29.1472
31	29.9642	29.9115	29.7874	29.724	29.717	29.6744	29.6248	29.3418	29.0483
31	29.9642	29.9115	29.7874	29.724	29.717	29.6744	29.6248	29.3418	28.9243
31	29.9642	29.9115	29.7874	29.724	29.717	29.6744	29.6248	29.306	29.1852
31	29.9642	29.9115	29.7874	29.724	29.717	29.6744	29.6248	29.306	29.1472
31	29.9642	29.9115	29.7874	29.724	29.717	29.6744	29.6248	29.306	29.0483
31	29.9642	29.9115	29.7874	29.724	29.717	29.6744	29.6248	29.1852	29.1472
31	29.9642	29.9115	29.7874	29.724	29.717	29.6744	29.6046	29.6028	29.0483
31	29.9642	29.9115	29.7874	29.724	29.717	29.6744	29.6046	29.6028	28.9243
31	29.9642	29.9115	29.7874	29.724	29.717	29.6744	29.6046	29.6028	28.8568
31	29.9642	29.9115	29.7874	29.724	29.717	29.6744	29.6046	29.6028	28.7557
31	29.9642	29.9115	29.7874	29.724	29.717	29.6744	29.6046	29.5435	29.1472
31	29.9642	29.9115	29.7874	29.724	29.717	29.6744	29.6046	29.5435	29.0483
31	29.9642	29.9115	29.7874	29.724	29.717	29.6744	29.6046	29.5435	28.9243
31	29.9642	29.9115	29.7874	29.724	29.717	29.6744	29.6046	29.5435	28.8568
31	29.9642	29.9115	29.7874	29.724	29.717	29.6744	29.6046	29.5435	28.7557
31	29.9642	29.9115	29.7874	29.724	29.717	29.6744	29.6046	29.5424	29.1472
31	29.9642	29.9115	29.7874	29.724	29.717	29.6744	29.6046	29.5424	29.0483
31	29.9642	29.9115	29.7874	29.724	29.717	29.6744	29.6046	29.5424	28.9243
31	29.9642	29.9115	29.7874	29.724	29.717	29.6744	29.6046	29.5424	28.8568
31	29.9642	29.9115	29.7874	29.724	29.717	29.6744	29.6046	29.5424	28.7557
31	29.9642	29.9115	29.7874	29.724	29.717	29.6744	29.6046	29.5326	29.1472
31	29.9642	29.9115	29.7874	29.724	29.717	29.6744	29.6046	29.5326	29.0483
31	29.9642	29.9115	29.7874	29.724	29.717	29.6744	29.6046	29.5326	28.9243
31	29.9642	29.9115	29.7874	29.724	29.717	29.6744	29.6046	29.5326	28.8568
31	29.9642	29.9115	29.7874	29.724	29.717	29.6744	29.6046	29.5326	28.7557
31	29.9642	29.9115	29.7874	29.724	29.717	29.6744	29.6046	29.5243	29.1472
31	29.9642	29.9115	29.7874	29.724	29.717	29.6744	29.6046	29.5243	29.0483
31	29.9642	29.9115	29.7874	29.724	29.717	29.6744	29.6046	29.5243	28.9243
31	29.9642	29.9115	29.7874	29.724	29.717	29.6744	29.6046	29.5243	28.8568
31	29.9642	29.9115	29.7874	29.724	29.717	29.6744	29.6046	29.5243	28.7557
31	29.9642	29.9115	29.7874	29.724	29.717	29.6744	29.6046	29.4468	29.1852
31	29.9642	29.9115	29.7874	29.724	29.717	29.6744	29.6046	29.4468	29.1472
31	29.9642	29.9115	29.7874	29.724	29.717	29.6744	29.6046	29.4468	29.0483
31	29.9642	29.9115	29.7874	29.724	29.717	29.6744	29.6046	29.4468	28.9243
31	29.9642	29.9115	29.7874	29.724	29.717	29.6744	29.6046	29.4468	28.8568
31	29.9642	29.9115	29.7874	29.724	29.717	29.6744	29.6046	29.4122	29.1852
31	29.9642	29.9115	29.7874	29.724	29.717	29.6744	29.6046	29.4122	29.1472
31	29.9642	29.9115	29.7874	29.724	29.717	29.6744	29.6046	29.4122	29.0483
31	29.9642	29.9115	29.7874	29.724	29.717	29.6744	29.6046	29.4122	28.9243
31	29.9642	29.9115	29.7874	29.724	29.717	29.6744	29.6046	29.4122	28.8568
31	29.9642	29.9115	29.7874	29.724	29.717	29.6744	29.6046	29.3639	29.306
31	29.9642	29.9115	29.7874	29.724	29.717	29.6744	29.6046	29.3639	29.1852
31	29.9642	29.9115	29.7874	29.724	29.717	29.6744	29.6046	29.3639	29.1472
31	29.9642	29.9115	29.7874	29.724	29.717	29.6744	29.6046	29.3639	29.0483
31	29.9642	29.9115	29.7874	29.724	29.717	29.6744	29.6046	29.3639	28.9243
31	29.9642	29.9115	29.7874	29.724	29.717	29.6744	29.6046	29.3591	29.3418
31	29.9642	29.9115	29.7874	29.724	29.717	29.6744	29.6046	29.3591	29.306
31	29.9642	29.9115	29.7874	29.724	29.717	29.6744	29.6046	29.3591	29.1852
31	29.9642	29.9115	29.7874	29.724	29.717	29.6744	29.6046	29.3591	29.1472
31	29.9642	29.9115	29.7874	29.724	29.717	29.6744	29.6046	29.3591	29.0483
31	29.9642	29.9115	29.7874	29.724	29.717	29.6744	29.6046	29.3591	28.9243
31	29.9642	29.9115	29.7874	29.724	29.717	29.6744	29.6046	29.3418	29.306
31	29.9642	29.9115	29.7874	29.724	29.717	29.6744	29.6046	29.3418	29.1852
31	29.9642	29.9115	29.7874	29.724	29.717	29.6744	29.6046	29.3418	29.1472
31	29.9642	29.9115	29.7874	29.724	29.717	29.6744	29.6046	29.3418	29.0483
31	29.9642	29.9115	29.7874	29.724	29.717	29.6744	29.6046	29.3418	28.9243
31	29.9642	29.9115	29.7874	29.724	29.717	29.6744	29.6046	29.306	29.1852
31	29.9642	29.9115	29.7874	29.724	29.717	29.6744	29.6046	29.306	29.1472
31	29.9642	29.9115	29.7874	29.724	29.717	29.6744	29.6046	29.306	29.0483
31	29.9642	29.9115	29.7874	29.724	29.717	29.6744	29.6046	29.1852	29.1472
31	29.9642	29.9115	29.7874	29.724	29.717	29.6744	29.6028	29.5435	29.1472
31	29.9642	29.9115	29.7874	29.724	29.717	29.6744	29.6028	29.5435	29.0483
31	29.9642	29.9115	29.7874	29.724	29.717	29.6744	29.6028	29.5435	28.9243
31	29.9642	29.9115	29.7874	29.724	29.717	29.6744	29.6028	29.5435	28.8568
31	29.9642	29.9115	29.7874	29.724	29.717	29.6744	29.6028	29.5435	28.7557
31	29.9642	29.9115	29.7874	29.724	29.717	29.6744	29.6028	29.5424	29.1472
31	29.9642	29.9115	29.7874	29.724	29.717	29.6744	29.6028	29.5424	29.0483
31	29.9642	29.9115	29.7874	29.724	29.717	29.6744	29.6028	29.5424	28.9243
31	29.9642	29.9115	29.7874	29.724	29.717	29.6744	29.6028	29.5424	28.8568
31	29.9642	29.9115	29.7874	29.724	29.717	29.6744	29.6028	29.5424	28.7557
31	29.9642	29.9115	29.7874	29.724	29.717	29.6744	29.6028	29.5326	29.1472
31	29.9642	29.9115	29.7874	29.724	29.717	29.6744	29.6028	29.5326	29.0483
31	29.9642	29.9115	29.7874	29.724	29.717	29.6744	29.6028	29.5326	28.9243
31	29.9642	29.9115	29.7874	29.724	29.717	29.6744	29.6028	29.5326	28.8568
31	29.9642	29.9115	29.7874	29.724	29.717	29.6744	29.6028	29.5326	28.7557
31	29.9642	29.9115	29.7874	29.724	29.717	29.6744	29.6028	29.5243	29.1472
31	29.9642	29.9115	29.7874	29.724	29.717	29.6744	29.6028	29.5243	29.0483
31	29.9642	29.9115	29.7874	29.724	29.717	29.6744	29.6028	29.5243	28.9243
31	29.9642	29.9115	29.7874	29.724	29.717	29.6744	29.6028	29.5243	28.8568
31	29.9642	29.9115	29.7874	29.724	29.717	29.6744	29.6028	29.5243	28.7557
31	29.9642	29.9115	29.7874	29.724	29.717	29.6744	29.6028	29.4468	29.1852
31	29.9642	29.9115	29.7874	29.724	29.717	29.6744	29.6028	29.4468	29.1472
31	29.9642	29.9115	29.7874	29.724	29.717	29.6744	29.6028	29.4468	29.0483
31	29.9642	29.9115	29.7874	29.724	29.717	29.6744	29.6028	29.4468	28.9243
31	29.9642	29.9115	29.7874	29.724	29.717	29.6744	29.6028	29.4468	28.8568
31	29.9642	29.9115	29.7874	29.724	29.717	29.6744	29.6028	29.4122	29.1852
31	29.9642	29.9115	29.7874	29.724	29.717	29.6744	29.6028	29.4122	29.1472
31	29.9642	29.9115	29.7874	29.724	29.717	29.6744	29.6028	29.4122	29.0483
31	29.9642	29.9115	29.7874	29.724	29.717	29.6744	29.6028	29.4122	28.9243
31	29.9642	29.9115	29.7874	29.724	29.717	29.6744	29.6028	29.4122	28.8568
31	29.9642	29.9115	29.7874	29.724	29.717	29.6744	29.6028	29.3639	29.3418
31	29.9642	29.9115	29.7874	29.724	29.717	29.6744	29.6028	29.3639	29.306
31	29.9642	29.9115	29.7874	29.724	29.717	29.6744	29.6028	29.3639	29.1852
31	29.9642	29.9115	29.7874	29.724	29.717	29.6744	29.6028	29.3639	29.1472
31	29.9642	29.9115	29.7874	29.724	29.717	29.6744	29.6028	29.3639	29.0483
31	29.9642	29.9115	29.7874	29.724	29.717	29.6744	29.6028	29.3639	28.9243
31	29.9642	29.9115	29.7874	29.724	29.717	29.6744	29.6028	29.3591	29.3418
31	29.9642	29.9115	29.7874	29.724	29.717	29.6744	29.6028	29.3591	29.306
31	29.9642	29.9115	29.7874	29.724	29.717	29.6744	29.6028	29.3591	29.1852
31	29.9642	29.9115	29.7874	29.724	29.717	29.6744	29.6028	29.3591	29.1472
31	29.9642	29.9115	29.7874	29.724	29.717	29.6744	29.6028	29.3591	29.0483
31	29.9642	29.9115	29.7874	29.724	29.717	29.6744	29.6028	29.3591	28.9243
31	29.9642	29.9115	29.7874	29.724	29.717	29.6744	29.6028	29.3418	29.306
31	29.9642	29.9115	29.7874	29.724	29.717	29.6744	29.6028	29.3418	29.1852
31	29.9642	29.9115	29.7874	29.724	29.717	29.6744	29.6028	29.3418	29.1472
31	29.9642	29.9115	29.7874	29.724	29.717	29.6744	29.6028	29.3418	29.0483
31	29.9642	29.9115	29.7874	29.724	29.717	29.6744	29.6028	29.306	29.1852
31	29.9642	29.9115	29.7874	29.724	29.717	29.6744	29.6028	29.306	29.1472
31	29.9642	29.9115	29.7874	29.724	29.717	29.6744	29.6028	29.306	29.0483
31	29.9642	29.9115	29.7874	29.724	29.717	29.6744	29.6028	29.1852	29.1472
31	29.9642	29.9115	29.7874	29.724	29.717	29.6744	29.5435	29.5424	29.1852
31	29.9642	29.9115	29.7874	29.724	29.717	29.6744	29.5435	29.5424	29.1472
31	29.9642	29.9115	29.7874	29.724	29.717	29.6744	29.5435	29.5424	29.0483
31	29.9642	29.9115	29.7874	29.724	29.717	29.6744	29.5435	29.5424	28.9243
31	29.9642	29.9115	29.7874	29.724	29.717	29.6744	29.5435	29.5424	28.8568
31	29.9642	29.9115	29.7874	29.724	29.717	29.6744	29.5435	29.5326	29.1852
31	29.9642	29.9115	29.7874	29.724	29.717	29.6744	29.5435	29.5326	29.1472
31	29.9642	29.9115	29.7874	29.724	29.717	29.6744	29.5435	29.5326	29.0483
31	29.9642	29.9115	29.7874	29.724	29.717	29.6744	29.5435	29.5326	28.9243
31	29.9642	29.9115	29.7874	29.724	29.717	29.6744	29.5435	29.5326	28.8568
31	29.9642	29.9115	29.7874	29.724	29.717	29.6744	29.5435	29.5243	29.1852
31	29.9642	29.9115	29.7874	29.724	29.717	29.6744	29.5435	29.5243	29.1472
31	29.9642	29.9115	29.7874	29.724	29.717	29.6744	29.5435	29.5243	29.0483
31	29.9642	29.9115	29.7874	29.724	29.717	29.6744	29.5435	29.5243	28.9243
31	29.9642	29.9115	29.7874	29.724	29.717	29.6744	29.5435	29.5243	28.8568
31	29.9642	29.9115	29.7874	29.724	29.717	29.6744	29.5435	29.4468	29.306
31	29.9642	29.9115	29.7874	29.724	29.717	29.6744	29.5435	29.4468	29.1852
31	29.9642	29.9115	29.7874	29.724	29.717	29.6744	29.5435	29.4468	29.1472
31	29.9642	29.9115	29.7874	29.724	29.717	29.6744	29.5435	29.4468	29.0483
31	29.9642	29.9115	29.7874	29.724	29.717	29.6744	29.5435	29.4468	28.9243
31	29.9642	29.9115	29.7874	29.724	29.717	29.6744	29.5435	29.4122	29.3418
31	29.9642	29.9115	29.7874	29.724	29.717	29.6744	29.5435	29.4122	29.306
31	29.9642	29.9115	29.7874	29.724	29.717	29.6744	29.5435	29.4122	29.1852
31	29.9642	29.9115	29.7874	29.724	29.717	29.6744	29.5435	29.4122	29.1472
31	29.9642	29.9115	29.7874	29.724	29.717	29.6744	29.5435	29.4122	29.0483
31	29.9642	29.9115	29.7874	29.724	29.717	29.6744	29.5435	29.4122	28.9243
31	29.9642	29.9115	29.7874	29.724	29.717	29.6744	29.5435	29.3639	29.3591
31	29.9642	29.9115	29.7874	29.724	29.717	29.6744	29.5435	29.3639	29.3418
31	29.9642	29.9115	29.7874	29.724	29.717	29.6744	29.5435	29.3639	29.306
31	29.9642	29.9115	29.7874	29.724	29.717	29.6744	29.5435	29.3639	29.1852
31	29.9642	29.9115	29.7874	29.724	29.717	29.6744	29.5435	29.3639	29.1472
31	29.9642	29.9115	29.7874	29.724	29.717	29.6744	29.5435	29.3639	29.0483
31	29.9642	29.9115	29.7874	29.724	29.717	29.6744	29.5435	29.3591	29.3418
31	29.9642	29.9115	29.7874	29.724	29.717	29.6744	29.5435	29.3591	29.306
31	29.9642	29.9115	29.7874	29.724	29.717	29.6744	29.5435	29.3591	29.1852
31	29.9642	29.9115	29.7874	29.724	29.717	29.6744	29.5435	29.3591	29.1472
31	29.9642	29.9115	29.7874	29.724	29.717	29.6744	29.5435	29.3591	29.0483
31	29.9642	29.9115	29.7874	29.724	29.717	29.6744	29.5435	29.3418	29.306
31	29.9642	29.9115	29.7874	29.724	29.717	29.6744	29.5435	29.3418	29.1852
31	29.9642	29.9115	29.7874	29.724	29.717	29.6744	29.5435	29.3418	29.1472
31	29.9642	29.9115	29.7874	29.724	29.717	29.6744	29.5435	29.3418	29.0483
31	29.9642	29.9115	29.7874	29.724	29.717	29.6744	29.5435	29.306	29.1852
31	29.9642	29.9115	29.7874	29.724	29.717	29.6744	29.5435	29.306	29.1472
31	29.9642	29.9115	29.7874	29.724	29.717	29.6744	29.5435	29.306	29.0483
31	29.9642	29.9115	29.7874	29.724	29.717	29.6744	29.5435	29.1852	29.1472
31	29.9642	29.9115	29.7874	29.724	29.717	29.6744	29.5424	29.5326	29.1852
31	29.9642	29.9115	29.7874	29.724	29.717	29.6744	29.5424	29.5326	29.1472
31	29.9642	29.9115	29.7874	29.724	29.717	29.6744	29.5424	29.5326	29.0483
31	29.9642	29.9115	29.7874	29.724	29.717	29.6744	29.5424	29.5326	28.9243
31	29.9642	29.9115	29.7874	29.724	29.717	29.6744	29.5424	29.5326	28.8568
31	29.9642	29.9115	29.7874	29.724	29.717	29.6744	29.5424	29.5243	29.1852
31	29.9642	29.9115	29.7874	29.724	29.717	29.6744	29.5424	29.5243	29.1472
31	29.9642	29.9115	29.7874	29.724	29.717	29.6744	29.5424	29.5243	29.0483
31	29.9642	29.9115	29.7874	29.724	29.717	29.6744	29.5424	29.5243	28.9243
31	29.9642	29.9115	29.7874	29.724	29.717	29.6744	29.5424	29.5243	28.8568
31	29.9642	29.9115	29.7874	29.724	29.717	29.6744	29.5424	29.4468	29.306
31	29.9642	29.9115	29.7874	29.724	29.717	29.6744	29.5424	29.4468	29.1852
31	29.9642	29.9115	29.7874	29.724	29.717	29.6744	29.5424	29.4468	29.1472
31	29.9642	29.9115	29.7874	29.724	29.717	29.6744	29.5424	29.4468	29.0483
31	29.9642	29.9115	29.7874	29.724	29.717	29.6744	29.5424	29.4468	28.9243
31	29.9642	29.9115	29.7874	29.724	29.717	29.6744	29.5424	29.4122	29.3418
31	29.9642	29.9115	29.7874	29.724	29.717	29.6744	29.5424	29.4122	29.306
31	29.9642	29.9115	29.7874	29.724	29.717	29.6744	29.5424	29.4122	29.1852
31	29.9642	29.9115	29.7874	29.724	29.717	29.6744	29.5424	29.4122	29.1472
31	29.9642	29.9115	29.7874	29.724	29.717	29.6744	29.5424	29.4122	29.0483
31	29.9642	29.9115	29.7874	29.724	29.717	29.6744	29.5424	29.4122	28.9243
31	29.9642	29.9115	29.7874	29.724	29.717	29.6744	29.5424	29.3639	29.3591
31	29.9642	29.9115	29.7874	29.724	29.717	29.6744	29.5424	29.3639	29.3418
31	29.9642	29.9115	29.7874	29.724	29.717	29.6744	29.5424	29.3639	29.306
31	29.9642	29.9115	29.7874	29.724	29.717	29.6744	29.5424	29.3639	29.1852
31	29.9642	29.9115	29.7874	29.724	29.717	29.6744	29.5424	29.3639	29.1472
31	29.9642	29.9115	29.7874	29.724	29.717	29.6744	29.5424	29.3639	29.0483
31	29.9642	29.9115	29.7874	29.724	29.717	29.6744	29.5424	29.3591	29.3418
31	29.9642	29.9115	29.7874	29.724	29.717	29.6744	29.5424	29.3591	29.306
31	29.9642	29.9115	29.7874	29.724	29.717	29.6744	29.5424	29.3591	29.1852
31	29.9642	29.9115	29.7874	29.724	29.717	29.6744	29.5424	29.3591	29.1472
31	29.9642	29.9115	29.7874	29.724	29.717	29.6744	29.5424	29.3591	29.0483
31	29.9642	29.9115	29.7874	29.724	29.717	29.6744	29.5424	29.3418	29.306
31	29.9642	29.9115	29.7874	29.724	29.717	29.6744	29.5424	29.3418	29.1852
31	29.9642	29.9115	29.7874	29.724	29.717	29.6744	29.5424	29.3418	29.1472
31	29.9642	29.9115	29.7874	29.724	29.717	29.6744	29.5424	29.3418	29.0483
31	29.9642	29.9115	29.7874	29.724	29.717	29.6744	29.5424	29.306	29.1852
31	29.9642	29.9115	29.7874	29.724	29.717	29.6744	29.5424	29.306	29.1472
31	29.9642	29.9115	29.7874	29.724	29.717	29.6744	29.5424	29.306	29.0483
31	29.9642	29.9115	29.7874	29.724	29.717	29.6744	29.5424	29.1852	29.1472
31	29.9642	29.9115	29.7874	29.724	29.717	29.6744	29.5326	29.5243	29.1852
31	29.9642	29.9115	29.7874	29.724	29.717	29.6744	29.5326	29.5243	29.1472
31	29.9642	29.9115	29.7874	29.724	29.717	29.6744	29.5326	29.5243	29.0483
31	29.9642	29.9115	29.7874	29.724	29.717	29.6744	29.5326	29.5243	28.9243
31	29.9642	29.9115	29.7874	29.724	29.717	29.6744	29.5326	29.5243	28.8568
31	29.9642	29.9115	29.7874	29.724	29.717	29.6744	29.5326	29.4468	29.306
31	29.9642	29.9115	29.7874	29.724	29.717	29.6744	29.5326	29.4468	29.1852
31	29.9642	29.9115	29.7874	29.724	29.717	29.6744	29.5326	29.4468	29.1472
31	29.9642	29.9115	29.7874	29.724	29.717	29.6744	29.5326	29.4468	29.0483
31	29.9642	29.9115	29.7874	29.724	29.717	29.6744	29.5326	29.4468	28.9243
31	29.9642	29.9115	29.7874	29.724	29.717	29.6744	29.5326	29.4122	29.3639
31	29.9642	29.9115	29.7874	29.724	29.717	29.6744	29.5326	29.4122	29.3591
31	29.9642	29.9115	29.7874	29.724	29.717	29.6744	29.5326	29.4122	29.3418
31	29.9642	29.9115	29.7874	29.724	29.717	29.6744	29.5326	29.4122	29.306
31	29.9642	29.9115	29.7874	29.724	29.717	29.6744	29.5326	29.4122	29.1852
31	29.9642	29.9115	29.7874	29.724	29.717	29.6744	29.5326	29.4122	29.1472
31	29.9642	29.9115	29.7874	29.724	29.717	29.6744	29.5326	29.4122	29.0483
31	29.9642	29.9115	29.7874	29.724	29.717	29.6744	29.5326	29.3639	29.3591
31	29.9642	29.9115	29.7874	29.724	29.717	29.6744	29.5326	29.3639	29.3418
31	29.9642	29.9115	29.7874	29.724	29.717	29.6744	29.5326	29.3639	29.306
31	29.9642	29.9115	29.7874	29.724	29.717	29.6744	29.5326	29.3639	29.1852
31	29.9642	29.9115	29.7874	29.724	29.717	29.6744	29.5326	29.3639	29.1472
31	29.9642	29.9115	29.7874	29.724	29.717	29.6744	29.5326	29.3639	29.0483
31	29.9642	29.9115	29.7874	29.724	29.717	29.6744	29.5326	29.3591	29.3418
31	29.9642	29.9115	29.7874	29.724	29.717	29.6744	29.5326	29.3591	29.306
31	29.9642	29.9115	29.7874	29.724	29.717	29.6744	29.5326	29.3591	29.1852
31	29.9642	29.9115	29.7874	29.724	29.717	29.6744	29.5326	29.3591	29.1472
31	29.9642	29.9115	29.7874	29.724	29.717	29.6744	29.5326	29.3591	29.0483
31	29.9642	29.9115	29.7874	29.724	29.717	29.6744	29.5326	29.3418	29.306
31	29.9642	29.9115	29.7874	29.724	29.717	29.6744	29.5326	29.3418	29.1852
31	29.9642	29.9115	29.7874	29.724	29.717	29.6744	29.5326	29.3418	29.1472
31	29.9642	29.9115	29.7874	29.724	29.717	29.6744	29.5326	29.3418	29.0483
31	29.9642	29.9115	29.7874	29.724	29.717	29.6744	29.5326	29.306	29.1852
31	29.9642	29.9115	29.7874	29.724	29.717	29.6744	29.5326	29.306	29.1472
31	29.9642	29.9115	29.7874	29.724	29.717	29.6744	29.5326	29.306	29.0483
31	29.9642	29.9115	29.7874	29.724	29.717	29.6744	29.5243	29.4468	29.306
31	29.9642	29.9115	29.7874	29.724	29.717	29.6744	29.5243	29.4468	29.1852
31	29.9642	29.9115	29.7874	29.724	29.717	29.6744	29.5243	29.4468	29.1472
31	29.9642	29.9115	29.7874	29.724	29.717	29.6744	29.5243	29.4468	29.0483
31	29.9642	29.9115	29.7874	29.724	29.717	29.6744	29.5243	29.4468	28.9243
31	29.9642	29.9115	29.7874	29.724	29.717	29.6744	29.5243	29.4122	29.3639
31	29.9642	29.9115	29.7874	29.724	29.717	29.6744	29.5243	29.4122	29.3591
31	29.9642	29.9115	29.7874	29.724	29.717	29.6744	29.5243	29.4122	29.3418
31	29.9642	29.9115	29.7874	29.724	29.717	29.6744	29.5243	29.4122	29.306
31	29.9642	29.9115	29.7874	29.724	29.717	29.6744	29.5243	29.4122	29.1852
31	29.9642	29.9115	29.7874	29.724	29.717	29.6744	29.5243	29.4122	29.1472
31	29.9642	29.9115	29.7874	29.724	29.717	29.6744	29.5243	29.4122	29.0483
31	29.9642	29.9115	29.7874	29.724	29.717	29.6744	29.5243	29.3639	29.3591
31	29.9642	29.9115	29.7874	29.724	29.717	29.6744	29.5243	29.3639	29.3418
31	29.9642	29.9115	29.7874	29.724	29.717	29.6744	29.5243	29.3639	29.306
31	29.9642	29.9115	29.7874	29.724	29.717	29.6744	29.5243	29.3639	29.1852
31	29.9642	29.9115	29.7874	29.724	29.717	29.6744	29.5243	29.3639	29.1472
31	29.9642	29.9115	29.7874	29.724	29.717	29.6744	29.5243	29.3639	29.0483
31	29.9642	29.9115	29.7874	29.724	29.717	29.6744	29.5243	29.3591	29.3418
31	29.9642	29.9115	29.7874	29.724	29.717	29.6744	29.5243	29.3591	29.306
31	29.9642	29.9115	29.7874	29.724	29.717	29.6744	29.5243	29.3591	29.1852
31	29.9642	29.9115	29.7874	29.724	29.717	29.6744	29.5243	29.3591	29.1472
31	29.9642	29.9115	29.7874	29.724	29.717	29.6744	29.5243	29.3591	29.0483
31	29.9642	29.9115	29.7874	29.724	29.717	29.6744	29.5243	29.3418	29.306
31	29.9642	29.9115	29.7874	29.724	29.717	29.6744	29.5243	29.3418	29.1852
31	29.9642	29.9115	29.7874	29.724	29.717	29.6744	29.5243	29.3418	29.1472
31	29.9642	29.9115	29.7874	29.724	29.717	29.6744	29.5243	29.3418	29.0483
31	29.9642	29.9115	29.7874	29.724	29.717	29.6744	29.5243	29.306	29.1852
31	29.9642	29.9115	29.7874	29.724	29.717	29.6744	29.5243	29.306	29.1472
31	29.9642	29.9115	29.7874	29.724	29.717	29.6744	29.5243	29.306	29.0483
31	29.9642	29.9115	29.7874	29.724	29.717	29.6744	29.4468	29.4122	29.3639
31	29.9642	29.9115	29.7874	29.724	29.717	29.6744	29.4468	29.4122	29.3591
31	29.9642	29.9115	29.7874	29.724	29.717	29.6744	29.4468	29.4122	29.3418
31	29.9642	29.9115	29.7874	29.724	29.717	29.6744	29.4468	29.4122	29.306
31	29.9642	29.9115	29.7874	29.724	29.717	29.6744	29.4468	29.4122	29.1852
31	29.9642	29.9115	29.7874	29.724	29.717	29.6744	29.4468	29.4122	29.1472
31	29.9642	29.9115	29.7874	29.724	29.717	29.6744	29.4468	29.4122	29.0483
31	29.9642	29.9115	29.7874	29.724	29.717	29.6744	29.4468	29.3639	29.3591
31	29.9642	29.9115	29.7874	29.724	29.717	29.6744	29.4468	29.3639	29.3418
31	29.9642	29.9115	29.7874	29.724	29.717	29.6744	29.4468	29.3639	29.306
31	29.9642	29.9115	29.7874	29.724	29.717	29.6744	29.4468	29.3639	29.1852
31	29.9642	29.9115	29.7874	29.724	29.717	29.6744	29.4468	29.3639	29.1472
31	29.9642	29.9115	29.7874	29.724	29.717	29.6744	29.4468	29.3591	29.3418
31	29.9642	29.9115	29.7874	29.724	29.717	29.6744	29.4468	29.3591	29.306
31	29.9642	29.9115	29.7874	29.724	29.717	29.6744	29.4468	29.3591	29.1852
31	29.9642	29.9115	29.7874	29.724	29.717	29.6744	29.4468	29.3591	29.1472
31	29.9642	29.9115	29.7874	29.724	29.717	29.6744	29.4468	29.3418	29.306
31	29.9642	29.9115	29.7874	29.724	29.717	29.6744	29.4468	29.3418	29.1852
31	29.9642	29.9115	29.7874	29.724	29.717	29.6744	29.4468	29.3418	29.1472
31	29.9642	29.9115	29.7874	29.724	29.717	29.6744	29.4468	29.306	29.1852
31	29.9642	29.9115	29.7874	29.724	29.717	29.6744	29.4468	29.306	29.1472
31	29.9642	29.9115	29.7874	29.724	29.717	29.6744	29.4122	29.3639	29.3591
31	29.9642	29.9115	29.7874	29.724	29.717	29.6744	29.4122	29.3639	29.3418
31	29.9642	29.9115	29.7874	29.724	29.717	29.6744	29.4122	29.3639	29.306
31	29.9642	29.9115	29.7874	29.724	29.717	29.6744	29.4122	29.3639	29.1852
31	29.9642	29.9115	29.7874	29.724	29.717	29.6744	29.4122	29.3639	29.1472
31	29.9642	29.9115	29.7874	29.724	29.717	29.6744	29.4122	29.3591	29.3418
31	29.9642	29.9115	29.7874	29.724	29.717	29.6744	29.4122	29.3591	29.306
31	29.9642	29.9115	29.7874	29.724	29.717	29.6744	29.4122	29.3591	29.1852
31	29.9642	29.9115	29.7874	29.724	29.717	29.6744	29.4122	29.3591	29.1472
31	29.9642	29.9115	29.7874	29.724	29.717	29.6744	29.4122	29.3418	29.306
31	29.9642	29.9115	29.7874	29.724	29.717	29.6744	29.4122	29.3418	29.1852
31	29.9642	29.9115	29.7874	29.724	29.717	29.6744	29.4122	29.3418	29.1472
31	29.9642	29.9115	29.7874	29.724	29.717	29.6744	29.4122	29.306	29.1852
31	29.9642	29.9115	29.7874	29.724	29.717	29.6744	29.3639	29.3591	29.3418
31	29.9642	29.9115	29.7874	29.724	29.717	29.6744	29.3639	29.3591	29.306
31	29.9642	29.9115	29.7874	29.724	29.717	29.6744	29.3639	29.3591	29.1852
31	29.9642	29.9115	29.7874	29.724	29.717	29.6744	29.3639	29.3591	29.1472
31	29.9642	29.9115	29.7874	29.724	29.717	29.6744	29.3639	29.3418	29.306
31	29.9642	29.9115	29.7874	29.724	29.717	29.6744	29.3639	29.3418	29.1852
31	29.9642	29.9115	29.7874	29.724	29.717	29.6744	29.3591	29.3418	29.306
31	29.9642	29.9115	29.7874	29.724	29.717	29.6744	29.3591	29.3418	29.1852
31	29.9642	29.9115	29.7874	29.724	29.717	29.6396	29.6248	29.6046	29.0483
31	29.9642	29.9115	29.7874	29.724	29.717	29.6396	29.6248	29.6046	28.9243
31	29.9642	29.9115	29.7874	29.724	29.717	29.6396	29.6248	29.6046	28.8568
31	29.9642	29.9115	29.7874	29.724	29.717	29.6396	29.6248	29.6046	28.7557
31	29.9642	29.9115	29.7874	29.724	29.717	29.6396	29.6248	29.6028	29.0483
31	29.9642	29.9115	29.7874	29.724	29.717	29.6396	29.6248	29.6028	28.9243
31	29.9642	29.9115	29.7874	29.724	29.717	29.6396	29.6248	29.6028	28.8568
31	29.9642	29.9115	29.7874	29.724	29.717	29.6396	29.6248	29.6028	28.7557
31	29.9642	29.9115	29.7874	29.724	29.717	29.6396	29.6248	29.5435	29.1472
31	29.9642	29.9115	29.7874	29.724	29.717	29.6396	29.6248	29.5435	29.0483
31	29.9642	29.9115	29.7874	29.724	29.717	29.6396	29.6248	29.5435	28.9243
31	29.9642	29.9115	29.7874	29.724	29.717	29.6396	29.6248	29.5435	28.8568
31	29.9642	29.9115	29.7874	29.724	29.717	29.6396	29.6248	29.5435	28.7557
31	29.9642	29.9115	29.7874	29.724	29.717	29.6396	29.6248	29.5424	29.1472
31	29.9642	29.9115	29.7874	29.724	29.717	29.6396	29.6248	29.5424	29.0483
31	29.9642	29.9115	29.7874	29.724	29.717	29.6396	29.6248	29.5424	28.9243
31	29.9642	29.9115	29.7874	29.724	29.717	29.6396	29.6248	29.5424	28.8568
31	29.9642	29.9115	29.7874	29.724	29.717	29.6396	29.6248	29.5424	28.7557
31	29.9642	29.9115	29.7874	29.724	29.717	29.6396	29.6248	29.5326	29.1852
31	29.9642	29.9115	29.7874	29.724	29.717	29.6396	29.6248	29.5326	29.1472
31	29.9642	29.9115	29.7874	29.724	29.717	29.6396	29.6248	29.5326	29.0483
31	29.9642	29.9115	29.7874	29.724	29.717	29.6396	29.6248	29.5326	28.9243
31	29.9642	29.9115	29.7874	29.724	29.717	29.6396	29.6248	29.5326	28.8568
31	29.9642	29.9115	29.7874	29.724	29.717	29.6396	29.6248	29.5326	28.7557
31	29.9642	29.9115	29.7874	29.724	29.717	29.6396	29.6248	29.5243	29.1852
31	29.9642	29.9115	29.7874	29.724	29.717	29.6396	29.6248	29.5243	29.1472
31	29.9642	29.9115	29.7874	29.724	29.717	29.6396	29.6248	29.5243	29.0483
31	29.9642	29.9115	29.7874	29.724	29.717	29.6396	29.6248	29.5243	28.9243
31	29.9642	29.9115	29.7874	29.724	29.717	29.6396	29.6248	29.5243	28.8568
31	29.9642	29.9115	29.7874	29.724	29.717	29.6396	29.6248	29.5243	28.7557
31	29.9642	29.9115	29.7874	29.724	29.717	29.6396	29.6248	29.4468	29.1852
31	29.9642	29.9115	29.7874	29.724	29.717	29.6396	29.6248	29.4468	29.1472
31	29.9642	29.9115	29.7874	29.724	29.717	29.6396	29.6248	29.4468	29.0483
31	29.9642	29.9115	29.7874	29.724	29.717	29.6396	29.6248	29.4468	28.9243
31	29.9642	29.9115	29.7874	29.724	29.717	29.6396	29.6248	29.4468	28.8568
31	29.9642	29.9115	29.7874	29.724	29.717	29.6396	29.6248	29.4122	29.306
31	29.9642	29.9115	29.7874	29.724	29.717	29.6396	29.6248	29.4122	29.1852
31	29.9642	29.9115	29.7874	29.724	29.717	29.6396	29.6248	29.4122	29.1472
31	29.9642	29.9115	29.7874	29.724	29.717	29.6396	29.6248	29.4122	29.0483
31	29.9642	29.9115	29.7874	29.724	29.717	29.6396	29.6248	29.4122	28.9243
31	29.9642	29.9115	29.7874	29.724	29.717	29.6396	29.6248	29.3639	29.3418
31	29.9642	29.9115	29.7874	29.724	29.717	29.6396	29.6248	29.3639	29.306
31	29.9642	29.9115	29.7874	29.724	29.717	29.6396	29.6248	29.3639	29.1852
31	29.9642	29.9115	29.7874	29.724	29.717	29.6396	29.6248	29.3639	29.1472
31	29.9642	29.9115	29.7874	29.724	29.717	29.6396	29.6248	29.3639	29.0483
31	29.9642	29.9115	29.7874	29.724	29.717	29.6396	29.6248	29.3639	28.9243
31	29.9642	29.9115	29.7874	29.724	29.717	29.6396	29.6248	29.3591	29.3418
31	29.9642	29.9115	29.7874	29.724	29.717	29.6396	29.6248	29.3591	29.306
31	29.9642	29.9115	29.7874	29.724	29.717	29.6396	29.6248	29.3591	29.1852
31	29.9642	29.9115	29.7874	29.724	29.717	29.6396	29.6248	29.3591	29.1472
31	29.9642	29.9115	29.7874	29.724	29.717	29.6396	29.6248	29.3591	29.0483
31	29.9642	29.9115	29.7874	29.724	29.717	29.6396	29.6248	29.3591	28.9243
31	29.9642	29.9115	29.7874	29.724	29.717	29.6396	29.6248	29.3418	29.306
31	29.9642	29.9115	29.7874	29.724	29.717	29.6396	29.6248	29.3418	29.1852
31	29.9642	29.9115	29.7874	29.724	29.717	29.6396	29.6248	29.3418	29.1472
31	29.9642	29.9115	29.7874	29.724	29.717	29.6396	29.6248	29.3418	29.0483
31	29.9642	29.9115	29.7874	29.724	29.717	29.6396	29.6248	29.306	29.1852
31	29.9642	29.9115	29.7874	29.724	29.717	29.6396	29.6248	29.306	29.1472
31	29.9642	29.9115	29.7874	29.724	29.717	29.6396	29.6248	29.306	29.0483
31	29.9642	29.9115	29.7874	29.724	29.717	29.6396	29.6248	29.1852	29.1472
31	29.9642	29.9115	29.7874	29.724	29.717	29.6396	29.6046	29.6028	29.0483
31	29.9642	29.9115	29.7874	29.724	29.717	29.6396	29.6046	29.6028	28.9243
31	29.9642	29.9115	29.7874	29.724	29.717	29.6396	29.6046	29.6028	28.8568
31	29.9642	29.9115	29.7874	29.724	29.717	29.6396	29.6046	29.6028	28.7557
31	29.9642	29.9115	29.7874	29.724	29.717	29.6396	29.6046	29.5435	29.1852
31	29.9642	29.9115	29.7874	29.724	29.717	29.6396	29.6046	29.5435	29.1472
31	29.9642	29.9115	29.7874	29.724	29.717	29.6396	29.6046	29.5435	29.0483
31	29.9642	29.9115	29.7874	29.724	29.717	29.6396	29.6046	29.5435	28.9243
31	29.9642	29.9115	29.7874	29.724	29.717	29.6396	29.6046	29.5435	28.8568
31	29.9642	29.9115	29.7874	29.724	29.717	29.6396	29.6046	29.5424	29.1852
31	29.9642	29.9115	29.7874	29.724	29.717	29.6396	29.6046	29.5424	29.1472
31	29.9642	29.9115	29.7874	29.724	29.717	29.6396	29.6046	29.5424	29.0483
31	29.9642	29.9115	29.7874	29.724	29.717	29.6396	29.6046	29.5424	28.9243
31	29.9642	29.9115	29.7874	29.724	29.717	29.6396	29.6046	29.5424	28.8568
31	29.9642	29.9115	29.7874	29.724	29.717	29.6396	29.6046	29.5326	29.1852
31	29.9642	29.9115	29.7874	29.724	29.717	29.6396	29.6046	29.5326	29.1472
31	29.9642	29.9115	29.7874	29.724	29.717	29.6396	29.6046	29.5326	29.0483
31	29.9642	29.9115	29.7874	29.724	29.717	29.6396	29.6046	29.5326	28.9243
31	29.9642	29.9115	29.7874	29.724	29.717	29.6396	29.6046	29.5326	28.8568
31	29.9642	29.9115	29.7874	29.724	29.717	29.6396	29.6046	29.5243	29.1852
31	29.9642	29.9115	29.7874	29.724	29.717	29.6396	29.6046	29.5243	29.1472
31	29.9642	29.9115	29.7874	29.724	29.717	29.6396	29.6046	29.5243	29.0483
31	29.9642	29.9115	29.7874	29.724	29.717	29.6396	29.6046	29.5243	28.9243
31	29.9642	29.9115	29.7874	29.724	29.717	29.6396	29.6046	29.5243	28.8568
31	29.9642	29.9115	29.7874	29.724	29.717	29.6396	29.6046	29.4468	29.1852
31	29.9642	29.9115	29.7874	29.724	29.717	29.6396	29.6046	29.4468	29.1472
31	29.9642	29.9115	29.7874	29.724	29.717	29.6396	29.6046	29.4468	29.0483
31	29.9642	29.9115	29.7874	29.724	29.717	29.6396	29.6046	29.4468	28.9243
31	29.9642	29.9115	29.7874	29.724	29.717	29.6396	29.6046	29.4468	28.8568
31	29.9642	29.9115	29.7874	29.724	29.717	29.6396	29.6046	29.4122	29.306
31	29.9642	29.9115	29.7874	29.724	29.717	29.6396	29.6046	29.4122	29.1852
31	29.9642	29.9115	29.7874	29.724	29.717	29.6396	29.6046	29.4122	29.1472
31	29.9642	29.9115	29.7874	29.724	29.717	29.6396	29.6046	29.4122	29.0483
31	29.9642	29.9115	29.7874	29.724	29.717	29.6396	29.6046	29.4122	28.9243
31	29.9642	29.9115	29.7874	29.724	29.717	29.6396	29.6046	29.3639	29.3591
31	29.9642	29.9115	29.7874	29.724	29.717	29.6396	29.6046	29.3639	29.3418
31	29.9642	29.9115	29.7874	29.724	29.717	29.6396	29.6046	29.3639	29.306
31	29.9642	29.9115	29.7874	29.724	29.717	29.6396	29.6046	29.3639	29.1852
31	29.9642	29.9115	29.7874	29.724	29.717	29.6396	29.6046	29.3639	29.1472
31	29.9642	29.9115	29.7874	29.724	29.717	29.6396	29.6046	29.3639	29.0483
31	29.9642	29.9115	29.7874	29.724	29.717	29.6396	29.6046	29.3591	29.3418
31	29.9642	29.9115	29.7874	29.724	29.717	29.6396	29.6046	29.3591	29.306
31	29.9642	29.9115	29.7874	29.724	29.717	29.6396	29.6046	29.3591	29.1852
31	29.9642	29.9115	29.7874	29.724	29.717	29.6396	29.6046	29.3591	29.1472
31	29.9642	29.9115	29.7874	29.724	29.717	29.6396	29.6046	29.3591	29.0483
31	29.9642	29.9115	29.7874	29.724	29.717	29.6396	29.6046	29.3418	29.306
31	29.9642	29.9115	29.7874	29.724	29.717	29.6396	29.6046	29.3418	29.1852
31	29.9642	29.9115	29.7874	29.724	29.717	29.6396	29.6046	29.3418	29.1472
31	29.9642	29.9115	29.7874	29.724	29.717	29.6396	29.6046	29.3418	29.0483
31	29.9642	29.9115	29.7874	29.724	29.717	29.6396	29.6046	29.306	29.1852
31	29.9642	29.9115	29.7874	29.724	29.717	29.6396	29.6046	29.306	29.1472
31	29.9642	29.9115	29.7874	29.724	29.717	29.6396	29.6046	29.306	29.0483
31	29.9642	29.9115	29.7874	29.724	29.717	29.6396	29.6046	29.1852	29.1472
31	29.9642	29.9115	29.7874	29.724	29.717	29.6396	29.6028	29.5435	29.1852
31	29.9642	29.9115	29.7874	29.724	29.717	29.6396	29.6028	29.5435	29.1472
31	29.9642	29.9115	29.7874	29.724	29.717	29.6396	29.6028	29.5435	29.0483
31	29.9642	29.9115	29.7874	29.724	29.717	29.6396	29.6028	29.5435	28.9243
31	29.9642	29.9115	29.7874	29.724	29.717	29.6396	29.6028	29.5435	28.8568
31	29.9642	29.9115	29.7874	29.724	29.717	29.6396	29.6028	29.5424	29.1852
31	29.9642	29.9115	29.7874	29.724	29.717	29.6396	29.6028	29.5424	29.1472
31	29.9642	29.9115	29.7874	29.724	29.717	29.6396	29.6028	29.5424	29.0483
31	29.9642	29.9115	29.7874	29.724	29.717	29.6396	29.6028	29.5424	28.9243
31	29.9642	29.9115	29.7874	29.724	29.717	29.6396	29.6028	29.5424	28.8568
31	29.9642	29.9115	29.7874	29.724	29.717	29.6396	29.6028	29.5326	29.1852
31	29.9642	29.9115	29.7874	29.724	29.717	29.6396	29.6028	29.5326	29.1472
31	29.9642	29.9115	29.7874	29.724	29.717	29.6396	29.6028	29.5326	29.0483
31	29.9642	29.9115	29.7874	29.724	29.717	29.6396	29.6028	29.5326	28.9243
31	29.9642	29.9115	29.7874	29.724	29.717	29.6396	29.6028	29.5326	28.8568
31	29.9642	29.9115	29.7874	29.724	29.717	29.6396	29.6028	29.5243	29.1852
31	29.9642	29.9115	29.7874	29.724	29.717	29.6396	29.6028	29.5243	29.1472
31	29.9642	29.9115	29.7874	29.724	29.717	29.6396	29.6028	29.5243	29.0483
31	29.9642	29.9115	29.7874	29.724	29.717	29.6396	29.6028	29.5243	28.9243
31	29.9642	29.9115	29.7874	29.724	29.717	29.6396	29.6028	29.5243	28.8568
31	29.9642	29.9115	29.7874	29.724	29.717	29.6396	29.6028	29.4468	29.1852
31	29.9642	29.9115	29.7874	29.724	29.717	29.6396	29.6028	29.4468	29.1472
31	29.9642	29.9115	29.7874	29.724	29.717	29.6396	29.6028	29.4468	29.0483
31	29.9642	29.9115	29.7874	29.724	29.717	29.6396	29.6028	29.4468	28.9243
31	29.9642	29.9115	29.7874	29.724	29.717	29.6396	29.6028	29.4468	28.8568
31	29.9642	29.9115	29.7874	29.724	29.717	29.6396	29.6028	29.4122	29.306
31	29.9642	29.9115	29.7874	29.724	29.717	29.6396	29.6028	29.4122	29.1852
31	29.9642	29.9115	29.7874	29.724	29.717	29.6396	29.6028	29.4122	29.1472
31	29.9642	29.9115	29.7874	29.724	29.717	29.6396	29.6028	29.4122	29.0483
31	29.9642	29.9115	29.7874	29.724	29.717	29.6396	29.6028	29.4122	28.9243
31	29.9642	29.9115	29.7874	29.724	29.717	29.6396	29.6028	29.3639	29.3591
31	29.9642	29.9115	29.7874	29.724	29.717	29.6396	29.6028	29.3639	29.3418
31	29.9642	29.9115	29.7874	29.724	29.717	29.6396	29.6028	29.3639	29.306
31	29.9642	29.9115	29.7874	29.724	29.717	29.6396	29.6028	29.3639	29.1852
31	29.9642	29.9115	29.7874	29.724	29.717	29.6396	29.6028	29.3639	29.1472
31	29.9642	29.9115	29.7874	29.724	29.717	29.6396	29.6028	29.3639	29.0483
31	29.9642	29.9115	29.7874	29.724	29.717	29.6396	29.6028	29.3591	29.3418
31	29.9642	29.9115	29.7874	29.724	29.717	29.6396	29.6028	29.3591	29.306
31	29.9642	29.9115	29.7874	29.724	29.717	29.6396	29.6028	29.3591	29.1852
31	29.9642	29.9115	29.7874	29.724	29.717	29.6396	29.6028	29.3591	29.1472
31	29.9642	29.9115	29.7874	29.724	29.717	29.6396	29.6028	29.3591	29.0483
31	29.9642	29.9115	29.7874	29.724	29.717	29.6396	29.6028	29.3418	29.306
31	29.9642	29.9115	29.7874	29.724	29.717	29.6396	29.6028	29.3418	29.1852
31	29.9642	29.9115	29.7874	29.724	29.717	29.6396	29.6028	29.3418	29.1472
31	29.9642	29.9115	29.7874	29.724	29.717	29.6396	29.6028	29.3418	29.0483
31	29.9642	29.9115	29.7874	29.724	29.717	29.6396	29.6028	29.306	29.1852
31	29.9642	29.9115	29.7874	29.724	29.717	29.6396	29.6028	29.306	29.1472
31	29.9642	29.9115	29.7874	29.724	29.717	29.6396	29.6028	29.306	29.0483
31	29.9642	29.9115	29.7874	29.724	29.717	29.6396	29.6028	29.1852	29.1472
31	29.9642	29.9115	29.7874	29.724	29.717	29.6396	29.5435	29.5424	29.1852
31	29.9642	29.9115	29.7874	29.724	29.717	29.6396	29.5435	29.5424	29.1472
31	29.9642	29.9115	29.7874	29.724	29.717	29.6396	29.5435	29.5424	29.0483
31	29.9642	29.9115	29.7874	29.724	29.717	29.6396	29.5435	29.5424	28.9243
31	29.9642	29.9115	29.7874	29.724	29.717	29.6396	29.5435	29.5424	28.8568
31	29.9642	29.9115	29.7874	29.724	29.717	29.6396	29.5435	29.5326	29.1852
31	29.9642	29.9115	29.7874	29.724	29.717	29.6396	29.5435	29.5326	29.1472
31	29.9642	29.9115	29.7874	29.724	29.717	29.6396	29.5435	29.5326	29.0483
31	29.9642	29.9115	29.7874	29.724	29.717	29.6396	29.5435	29.5326	28.9243
31	29.9642	29.9115	29.7874	29.724	29.717	29.6396	29.5435	29.5326	28.8568
31	29.9642	29.9115	29.7874	29.724	29.717	29.6396	29.5435	29.5243	29.1852
31	29.9642	29.9115	29.7874	29.724	29.717	29.6396	29.5435	29.5243	29.1472
31	29.9642	29.9115	29.7874	29.724	29.717	29.6396	29.5435	29.5243	29.0483
31	29.9642	29.9115	29.7874	29.724	29.717	29.6396	29.5435	29.5243	28.9243
31	29.9642	29.9115	29.7874	29.724	29.717	29.6396	29.5435	29.5243	28.8568
31	29.9642	29.9115	29.7874	29.724	29.717	29.6396	29.5435	29.4468	29.3418
31	29.9642	29.9115	29.7874	29.724	29.717	29.6396	29.5435	29.4468	29.306
31	29.9642	29.9115	29.7874	29.724	29.717	29.6396	29.5435	29.4468	29.1852
31	29.9642	29.9115	29.7874	29.724	29.717	29.6396	29.5435	29.4468	29.1472
31	29.9642	29.9115	29.7874	29.724	29.717	29.6396	29.5435	29.4468	29.0483
31	29.9642	29.9115	29.7874	29.724	29.717	29.6396	29.5435	29.4468	28.9243
31	29.9642	29.9115	29.7874	29.724	29.717	29.6396	29.5435	29.4122	29.3639
31	29.9642	29.9115	29.7874	29.724	29.717	29.6396	29.5435	29.4122	29.3591
31	29.9642	29.9115	29.7874	29.724	29.717	29.6396	29.5435	29.4122	29.3418
31	29.9642	29.9115	29.7874	29.724	29.717	29.6396	29.5435	29.4122	29.306
31	29.9642	29.9115	29.7874	29.724	29.717	29.6396	29.5435	29.4122	29.1852
31	29.9642	29.9115	29.7874	29.724	29.717	29.6396	29.5435	29.4122	29.1472
31	29.9642	29.9115	29.7874	29.724	29.717	29.6396	29.5435	29.4122	29.0483
31	29.9642	29.9115	29.7874	29.724	29.717	29.6396	29.5435	29.3639	29.3591
31	29.9642	29.9115	29.7874	29.724	29.717	29.6396	29.5435	29.3639	29.3418
31	29.9642	29.9115	29.7874	29.724	29.717	29.6396	29.5435	29.3639	29.306
31	29.9642	29.9115	29.7874	29.724	29.717	29.6396	29.5435	29.3639	29.1852
31	29.9642	29.9115	29.7874	29.724	29.717	29.6396	29.5435	29.3639	29.1472
31	29.9642	29.9115	29.7874	29.724	29.717	29.6396	29.5435	29.3639	29.0483
31	29.9642	29.9115	29.7874	29.724	29.717	29.6396	29.5435	29.3591	29.3418
31	29.9642	29.9115	29.7874	29.724	29.717	29.6396	29.5435	29.3591	29.306
31	29.9642	29.9115	29.7874	29.724	29.717	29.6396	29.5435	29.3591	29.1852
31	29.9642	29.9115	29.7874	29.724	29.717	29.6396	29.5435	29.3591	29.1472
31	29.9642	29.9115	29.7874	29.724	29.717	29.6396	29.5435	29.3591	29.0483
31	29.9642	29.9115	29.7874	29.724	29.717	29.6396	29.5435	29.3418	29.306
31	29.9642	29.9115	29.7874	29.724	29.717	29.6396	29.5435	29.3418	29.1852
31	29.9642	29.9115	29.7874	29.724	29.717	29.6396	29.5435	29.3418	29.1472
31	29.9642	29.9115	29.7874	29.724	29.717	29.6396	29.5435	29.3418	29.0483
31	29.9642	29.9115	29.7874	29.724	29.717	29.6396	29.5435	29.306	29.1852
31	29.9642	29.9115	29.7874	29.724	29.717	29.6396	29.5435	29.306	29.1472
31	29.9642	29.9115	29.7874	29.724	29.717	29.6396	29.5424	29.5326	29.1852
31	29.9642	29.9115	29.7874	29.724	29.717	29.6396	29.5424	29.5326	29.1472
31	29.9642	29.9115	29.7874	29.724	29.717	29.6396	29.5424	29.5326	29.0483
31	29.9642	29.9115	29.7874	29.724	29.717	29.6396	29.5424	29.5326	28.9243
31	29.9642	29.9115	29.7874	29.724	29.717	29.6396	29.5424	29.5326	28.8568
31	29.9642	29.9115	29.7874	29.724	29.717	29.6396	29.5424	29.5243	29.1852
31	29.9642	29.9115	29.7874	29.724	29.717	29.6396	29.5424	29.5243	29.1472
31	29.9642	29.9115	29.7874	29.724	29.717	29.6396	29.5424	29.5243	29.0483
31	29.9642	29.9115	29.7874	29.724	29.717	29.6396	29.5424	29.5243	28.9243
31	29.9642	29.9115	29.7874	29.724	29.717	29.6396	29.5424	29.5243	28.8568
31	29.9642	29.9115	29.7874	29.724	29.717	29.6396	29.5424	29.4468	29.3418
31	29.9642	29.9115	29.7874	29.724	29.717	29.6396	29.5424	29.4468	29.306
31	29.9642	29.9115	29.7874	29.724	29.717	29.6396	29.5424	29.4468	29.1852
31	29.9642	29.9115	29.7874	29.724	29.717	29.6396	29.5424	29.4468	29.1472
31	29.9642	29.9115	29.7874	29.724	29.717	29.6396	29.5424	29.4468	29.0483
31	29.9642	29.9115	29.7874	29.724	29.717	29.6396	29.5424	29.4468	28.9243
31	29.9642	29.9115	29.7874	29.724	29.717	29.6396	29.5424	29.4122	29.3639
31	29.9642	29.9115	29.7874	29.724	29.717	29.6396	29.5424	29.4122	29.3591
31	29.9642	29.9115	29.7874	29.724	29.717	29.6396	29.5424	29.4122	29.3418
31	29.9642	29.9115	29.7874	29.724	29.717	29.6396	29.5424	29.4122	29.306
31	29.9642	29.9115	29.7874	29.724	29.717	29.6396	29.5424	29.4122	29.1852
31	29.9642	29.9115	29.7874	29.724	29.717	29.6396	29.5424	29.4122	29.1472
31	29.9642	29.9115	29.7874	29.724	29.717	29.6396	29.5424	29.4122	29.0483
31	29.9642	29.9115	29.7874	29.724	29.717	29.6396	29.5424	29.3639	29.3591
31	29.9642	29.9115	29.7874	29.724	29.717	29.6396	29.5424	29.3639	29.3418
31	29.9642	29.9115	29.7874	29.724	29.717	29.6396	29.5424	29.3639	29.306
31	29.9642	29.9115	29.7874	29.724	29.717	29.6396	29.5424	29.3639	29.1852
31	29.9642	29.9115	29.7874	29.724	29.717	29.6396	29.5424	29.3639	29.1472
31	29.9642	29.9115	29.7874	29.724	29.717	29.6396	29.5424	29.3639	29.0483
31	29.9642	29.9115	29.7874	29.724	29.717	29.6396	29.5424	29.3591	29.3418
31	29.9642	29.9115	29.7874	29.724	29.717	29.6396	29.5424	29.3591	29.306
31	29.9642	29.9115	29.7874	29.724	29.717	29.6396	29.5424	29.3591	29.1852
31	29.9642	29.9115	29.7874	29.724	29.717	29.6396	29.5424	29.3591	29.1472
31	29.9642	29.9115	29.7874	29.724	29.717	29.6396	29.5424	29.3591	29.0483
31	29.9642	29.9115	29.7874	29.724	29.717	29.6396	29.5424	29.3418	29.306
31	29.9642	29.9115	29.7874	29.724	29.717	29.6396	29.5424	29.3418	29.1852
31	29.9642	29.9115	29.7874	29.724	29.717	29.6396	29.5424	29.3418	29.1472
31	29.9642	29.9115	29.7874	29.724	29.717	29.6396	29.5424	29.3418	29.0483
31	29.9642	29.9115	29.7874	29.724	29.717	29.6396	29.5424	29.306	29.1852
31	29.9642	29.9115	29.7874	29.724	29.717	29.6396	29.5424	29.306	29.1472
31	29.9642	29.9115	29.7874	29.724	29.717	29.6396	29.5326	29.5243	29.1852
31	29.9642	29.9115	29.7874	29.724	29.717	29.6396	29.5326	29.5243	29.1472
31	29.9642	29.9115	29.7874	29.724	29.717	29.6396	29.5326	29.5243	29.0483
31	29.9642	29.9115	29.7874	29.724	29.717	29.6396	29.5326	29.5243	28.9243
31	29.9642	29.9115	29.7874	29.724	29.717	29.6396	29.5326	29.5243	28.8568
31	29.9642	29.9115	29.7874	29.724	29.717	29.6396	29.5326	29.4468	29.3639
31	29.9642	29.9115	29.7874	29.724	29.717	29.6396	29.5326	29.4468	29.3591
31	29.9642	29.9115	29.7874	29.724	29.717	29.6396	29.5326	29.4468	29.3418
31	29.9642	29.9115	29.7874	29.724	29.717	29.6396	29.5326	29.4468	29.306
31	29.9642	29.9115	29.7874	29.724	29.717	29.6396	29.5326	29.4468	29.1852
31	29.9642	29.9115	29.7874	29.724	29.717	29.6396	29.5326	29.4468	29.1472
31	29.9642	29.9115	29.7874	29.724	29.717	29.6396	29.5326	29.4468	29.0483
31	29.9642	29.9115	29.7874	29.724	29.717	29.6396	29.5326	29.4122	29.3639
31	29.9642	29.9115	29.7874	29.724	29.717	29.6396	29.5326	29.4122	29.3591
31	29.9642	29.9115	29.7874	29.724	29.717	29.6396	29.5326	29.4122	29.3418
31	29.9642	29.9115	29.7874	29.724	29.717	29.6396	29.5326	29.4122	29.306
31	29.9642	29.9115	29.7874	29.724	29.717	29.6396	29.5326	29.4122	29.1852
31	29.9642	29.9115	29.7874	29.724	29.717	29.6396	29.5326	29.4122	29.1472
31	29.9642	29.9115	29.7874	29.724	29.717	29.6396	29.5326	29.4122	29.0483
31	29.9642	29.9115	29.7874	29.724	29.717	29.6396	29.5326	29.3639	29.3591
31	29.9642	29.9115	29.7874	29.724	29.717	29.6396	29.5326	29.3639	29.3418
31	29.9642	29.9115	29.7874	29.724	29.717	29.6396	29.5326	29.3639	29.306
31	29.9642	29.9115	29.7874	29.724	29.717	29.6396	29.5326	29.3639	29.1852
31	29.9642	29.9115	29.7874	29.724	29.717	29.6396	29.5326	29.3639	29.1472
31	29.9642	29.9115	29.7874	29.724	29.717	29.6396	29.5326	29.3639	29.0483
31	29.9642	29.9115	29.7874	29.724	29.717	29.6396	29.5326	29.3591	29.3418
31	29.9642	29.9115	29.7874	29.724	29.717	29.6396	29.5326	29.3591	29.306
31	29.9642	29.9115	29.7874	29.724	29.717	29.6396	29.5326	29.3591	29.1852
31	29.9642	29.9115	29.7874	29.724	29.717	29.6396	29.5326	29.3591	29.1472
31	29.9642	29.9115	29.7874	29.724	29.717	29.6396	29.5326	29.3591	29.0483
31	29.9642	29.9115	29.7874	29.724	29.717	29.6396	29.5326	29.3418	29.306
31	29.9642	29.9115	29.7874	29.724	29.717	29.6396	29.5326	29.3418	29.1852
31	29.9642	29.9115	29.7874	29.724	29.717	29.6396	29.5326	29.3418	29.1472
31	29.9642	29.9115	29.7874	29.724	29.717	29.6396	29.5326	29.3418	29.0483
31	29.9642	29.9115	29.7874	29.724	29.717	29.6396	29.5326	29.306	29.1852
31	29.9642	29.9115	29.7874	29.724	29.717	29.6396	29.5326	29.306	29.1472
31	29.9642	29.9115	29.7874	29.724	29.717	29.6396	29.5243	29.4468	29.3639
31	29.9642	29.9115	29.7874	29.724	29.717	29.6396	29.5243	29.4468	29.3591
31	29.9642	29.9115	29.7874	29.724	29.717	29.6396	29.5243	29.4468	29.3418
31	29.9642	29.9115	29.7874	29.724	29.717	29.6396	29.5243	29.4468	29.306
31	29.9642	29.9115	29.7874	29.724	29.717	29.6396	29.5243	29.4468	29.1852
31	29.9642	29.9115	29.7874	29.724	29.717	29.6396	29.5243	29.4468	29.1472
31	29.9642	29.9115	29.7874	29.724	29.717	29.6396	29.5243	29.4468	29.0483
31	29.9642	29.9115	29.7874	29.724	29.717	29.6396	29.5243	29.4122	29.3639
31	29.9642	29.9115	29.7874	29.724	29.717	29.6396	29.5243	29.4122	29.3591
31	29.9642	29.9115	29.7874	29.724	29.717	29.6396	29.5243	29.4122	29.3418
31	29.9642	29.9115	29.7874	29.724	29.717	29.6396	29.5243	29.4122	29.306
31	29.9642	29.9115	29.7874	29.724	29.717	29.6396	29.5243	29.4122	29.1852
31	29.9642	29.9115	29.7874	29.724	29.717	29.6396	29.5243	29.4122	29.1472
31	29.9642	29.9115	29.7874	29.724	29.717	29.6396	29.5243	29.4122	29.0483
31	29.9642	29.9115	29.7874	29.724	29.717	29.6396	29.5243	29.3639	29.3591
31	29.9642	29.9115	29.7874	29.724	29.717	29.6396	29.5243	29.3639	29.3418
31	29.9642	29.9115	29.7874	29.724	29.717	29.6396	29.5243	29.3639	29.306
31	29.9642	29.9115	29.7874	29.724	29.717	29.6396	29.5243	29.3639	29.1852
31	29.9642	29.9115	29.7874	29.724	29.717	29.6396	29.5243	29.3639	29.1472
31	29.9642	29.9115	29.7874	29.724	29.717	29.6396	29.5243	29.3639	29.0483
31	29.9642	29.9115	29.7874	29.724	29.717	29.6396	29.5243	29.3591	29.3418
31	29.9642	29.9115	29.7874	29.724	29.717	29.6396	29.5243	29.3591	29.306
31	29.9642	29.9115	29.7874	29.724	29.717	29.6396	29.5243	29.3591	29.1852
31	29.9642	29.9115	29.7874	29.724	29.717	29.6396	29.5243	29.3591	29.1472
31	29.9642	29.9115	29.7874	29.724	29.717	29.6396	29.5243	29.3591	29.0483
31	29.9642	29.9115	29.7874	29.724	29.717	29.6396	29.5243	29.3418	29.306
31	29.9642	29.9115	29.7874	29.724	29.717	29.6396	29.5243	29.3418	29.1852
31	29.9642	29.9115	29.7874	29.724	29.717	29.6396	29.5243	29.3418	29.1472
31	29.9642	29.9115	29.7874	29.724	29.717	29.6396	29.5243	29.3418	29.0483
31	29.9642	29.9115	29.7874	29.724	29.717	29.6396	29.5243	29.306	29.1852
31	29.9642	29.9115	29.7874	29.724	29.717	29.6396	29.5243	29.306	29.1472
31	29.9642	29.9115	29.7874	29.724	29.717	29.6396	29.4468	29.4122	29.3639
31	29.9642	29.9115	29.7874	29.724	29.717	29.6396	29.4468	29.4122	29.3591
31	29.9642	29.9115	29.7874	29.724	29.717	29.6396	29.4468	29.4122	29.3418
31	29.9642	29.9115	29.7874	29.724	29.717	29.6396	29.4468	29.4122	29.306
31	29.9642	29.9115	29.7874	29.724	29.717	29.6396	29.4468	29.4122	29.1852
31	29.9642	29.9115	29.7874	29.724	29.717	29.6396	29.4468	29.4122	29.1472
31	29.9642	29.9115	29.7874	29.724	29.717	29.6396	29.4468	29.4122	29.0483
31	29.9642	29.9115	29.7874	29.724	29.717	29.6396	29.4468	29.3639	29.3591
31	29.9642	29.9115	29.7874	29.724	29.717	29.6396	29.4468	29.3639	29.3418
31	29.9642	29.9115	29.7874	29.724	29.717	29.6396	29.4468	29.3639	29.306
31	29.9642	29.9115	29.7874	29.724	29.717	29.6396	29.4468	29.3639	29.1852
31	29.9642	29.9115	29.7874	29.724	29.717	29.6396	29.4468	29.3639	29.1472
31	29.9642	29.9115	29.7874	29.724	29.717	29.6396	29.4468	29.3591	29.3418
31	29.9642	29.9115	29.7874	29.724	29.717	29.6396	29.4468	29.3591	29.306
31	29.9642	29.9115	29.7874	29.724	29.717	29.6396	29.4468	29.3591	29.1852
31	29.9642	29.9115	29.7874	29.724	29.717	29.6396	29.4468	29.3591	29.1472
31	29.9642	29.9115	29.7874	29.724	29.717	29.6396	29.4468	29.3418	29.306
31	29.9642	29.9115	29.7874	29.724	29.717	29.6396	29.4468	29.3418	29.1852
31	29.9642	29.9115	29.7874	29.724	29.717	29.6396	29.4468	29.3418	29.1472
31	29.9642	29.9115	29.7874	29.724	29.717	29.6396	29.4468	29.306	29.1852
31	29.9642	29.9115	29.7874	29.724	29.717	29.6396	29.4122	29.3639	29.3591
31	29.9642	29.9115	29.7874	29.724	29.717	29.6396	29.4122	29.3639	29.3418
31	29.9642	29.9115	29.7874	29.724	29.717	29.6396	29.4122	29.3639	29.306
31	29.9642	29.9115	29.7874	29.724	29.717	29.6396	29.4122	29.3639	29.1852
31	29.9642	29.9115	29.7874	29.724	29.717	29.6396	29.4122	29.3639	29.1472
31	29.9642	29.9115	29.7874	29.724	29.717	29.6396	29.4122	29.3591	29.3418
31	29.9642	29.9115	29.7874	29.724	29.717	29.6396	29.4122	29.3591	29.306
31	29.9642	29.9115	29.7874	29.724	29.717	29.6396	29.4122	29.3591	29.1852
31	29.9642	29.9115	29.7874	29.724	29.717	29.6396	29.4122	29.3591	29.1472
31	29.9642	29.9115	29.7874	29.724	29.717	29.6396	29.4122	29.3418	29.306
31	29.9642	29.9115	29.7874	29.724	29.717	29.6396	29.4122	29.3418	29.1852
31	29.9642	29.9115	29.7874	29.724	29.717	29.6396	29.3639	29.3591	29.3418
31	29.9642	29.9115	29.7874	29.724	29.717	29.6396	29.3639	29.3591	29.306
31	29.9642	29.9115	29.7874	29.724	29.717	29.6396	29.3639	29.3591	29.1852
31	29.9642	29.9115	29.7874	29.724	29.717	29.6396	29.3639	29.3418	29.306
31	29.9642	29.9115	29.7874	29.724	29.717	29.6396	29.3591	29.3418	29.306
31	29.9642	29.9115	29.7874	29.724	29.717	29.6248	29.6046	29.6028	29.1472
31	29.9642	29.9115	29.7874	29.724	29.717	29.6248	29.6046	29.6028	29.0483
31	29.9642	29.9115	29.7874	29.724	29.717	29.6248	29.6046	29.6028	28.9243
31	29.9642	29.9115	29.7874	29.724	29.717	29.6248	29.6046	29.6028	28.8568
31	29.9642	29.9115	29.7874	29.724	29.717	29.6248	29.6046	29.6028	28.7557
31	29.9642	29.9115	29.7874	29.724	29.717	29.6248	29.6046	29.5435	29.1852
31	29.9642	29.9115	29.7874	29.724	29.717	29.6248	29.6046	29.5435	29.1472
31	29.9642	29.9115	29.7874	29.724	29.717	29.6248	29.6046	29.5435	29.0483
31	29.9642	29.9115	29.7874	29.724	29.717	29.6248	29.6046	29.5435	28.9243
31	29.9642	29.9115	29.7874	29.724	29.717	29.6248	29.6046	29.5435	28.8568
31	29.9642	29.9115	29.7874	29.724	29.717	29.6248	29.6046	29.5424	29.1852
31	29.9642	29.9115	29.7874	29.724	29.717	29.6248	29.6046	29.5424	29.1472
31	29.9642	29.9115	29.7874	29.724	29.717	29.6248	29.6046	29.5424	29.0483
31	29.9642	29.9115	29.7874	29.724	29.717	29.6248	29.6046	29.5424	28.9243
31	29.9642	29.9115	29.7874	29.724	29.717	29.6248	29.6046	29.5424	28.8568
31	29.9642	29.9115	29.7874	29.724	29.717	29.6248	29.6046	29.5326	29.1852
31	29.9642	29.9115	29.7874	29.724	29.717	29.6248	29.6046	29.5326	29.1472
31	29.9642	29.9115	29.7874	29.724	29.717	29.6248	29.6046	29.5326	29.0483
31	29.9642	29.9115	29.7874	29.724	29.717	29.6248	29.6046	29.5326	28.9243
31	29.9642	29.9115	29.7874	29.724	29.717	29.6248	29.6046	29.5326	28.8568
31	29.9642	29.9115	29.7874	29.724	29.717	29.6248	29.6046	29.5243	29.1852
31	29.9642	29.9115	29.7874	29.724	29.717	29.6248	29.6046	29.5243	29.1472
31	29.9642	29.9115	29.7874	29.724	29.717	29.6248	29.6046	29.5243	29.0483
31	29.9642	29.9115	29.7874	29.724	29.717	29.6248	29.6046	29.5243	28.9243
31	29.9642	29.9115	29.7874	29.724	29.717	29.6248	29.6046	29.5243	28.8568
31	29.9642	29.9115	29.7874	29.724	29.717	29.6248	29.6046	29.4468	29.306
31	29.9642	29.9115	29.7874	29.724	29.717	29.6248	29.6046	29.4468	29.1852
31	29.9642	29.9115	29.7874	29.724	29.717	29.6248	29.6046	29.4468	29.1472
31	29.9642	29.9115	29.7874	29.724	29.717	29.6248	29.6046	29.4468	29.0483
31	29.9642	29.9115	29.7874	29.724	29.717	29.6248	29.6046	29.4468	28.9243
31	29.9642	29.9115	29.7874	29.724	29.717	29.6248	29.6046	29.4122	29.3418
31	29.9642	29.9115	29.7874	29.724	29.717	29.6248	29.6046	29.4122	29.306
31	29.9642	29.9115	29.7874	29.724	29.717	29.6248	29.6046	29.4122	29.1852
31	29.9642	29.9115	29.7874	29.724	29.717	29.6248	29.6046	29.4122	29.1472
31	29.9642	29.9115	29.7874	29.724	29.717	29.6248	29.6046	29.4122	29.0483
31	29.9642	29.9115	29.7874	29.724	29.717	29.6248	29.6046	29.4122	28.9243
31	29.9642	29.9115	29.7874	29.724	29.717	29.6248	29.6046	29.3639	29.3591
31	29.9642	29.9115	29.7874	29.724	29.717	29.6248	29.6046	29.3639	29.3418
31	29.9642	29.9115	29.7874	29.724	29.717	29.6248	29.6046	29.3639	29.306
31	29.9642	29.9115	29.7874	29.724	29.717	29.6248	29.6046	29.3639	29.1852
31	29.9642	29.9115	29.7874	29.724	29.717	29.6248	29.6046	29.3639	29.1472
31	29.9642	29.9115	29.7874	29.724	29.717	29.6248	29.6046	29.3639	29.0483
31	29.9642	29.9115	29.7874	29.724	29.717	29.6248	29.6046	29.3591	29.3418
31	29.9642	29.9115	29.7874	29.724	29.717	29.6248	29.6046	29.3591	29.306
31	29.9642	29.9115	29.7874	29.724	29.717	29.6248	29.6046	29.3591	29.1852
31	29.9642	29.9115	29.7874	29.724	29.717	29.6248	29.6046	29.3591	29.1472
31	29.9642	29.9115	29.7874	29.724	29.717	29.6248	29.6046	29.3591	29.0483
31	29.9642	29.9115	29.7874	29.724	29.717	29.6248	29.6046	29.3418	29.306
31	29.9642	29.9115	29.7874	29.724	29.717	29.6248	29.6046	29.3418	29.1852
31	29.9642	29.9115	29.7874	29.724	29.717	29.6248	29.6046	29.3418	29.1472
31	29.9642	29.9115	29.7874	29.724	29.717	29.6248	29.6046	29.3418	29.0483
31	29.9642	29.9115	29.7874	29.724	29.717	29.6248	29.6046	29.306	29.1852
31	29.9642	29.9115	29.7874	29.724	29.717	29.6248	29.6046	29.306	29.1472
31	29.9642	29.9115	29.7874	29.724	29.717	29.6248	29.6046	29.306	29.0483
31	29.9642	29.9115	29.7874	29.724	29.717	29.6248	29.6046	29.1852	29.1472
31	29.9642	29.9115	29.7874	29.724	29.717	29.6248	29.6028	29.5435	29.1852
31	29.9642	29.9115	29.7874	29.724	29.717	29.6248	29.6028	29.5435	29.1472
31	29.9642	29.9115	29.7874	29.724	29.717	29.6248	29.6028	29.5435	29.0483
31	29.9642	29.9115	29.7874	29.724	29.717	29.6248	29.6028	29.5435	28.9243
31	29.9642	29.9115	29.7874	29.724	29.717	29.6248	29.6028	29.5435	28.8568
31	29.9642	29.9115	29.7874	29.724	29.717	29.6248	29.6028	29.5424	29.1852
31	29.9642	29.9115	29.7874	29.724	29.717	29.6248	29.6028	29.5424	29.1472
31	29.9642	29.9115	29.7874	29.724	29.717	29.6248	29.6028	29.5424	29.0483
31	29.9642	29.9115	29.7874	29.724	29.717	29.6248	29.6028	29.5424	28.9243
31	29.9642	29.9115	29.7874	29.724	29.717	29.6248	29.6028	29.5424	28.8568
31	29.9642	29.9115	29.7874	29.724	29.717	29.6248	29.6028	29.5326	29.1852
31	29.9642	29.9115	29.7874	29.724	29.717	29.6248	29.6028	29.5326	29.1472
31	29.9642	29.9115	29.7874	29.724	29.717	29.6248	29.6028	29.5326	29.0483
31	29.9642	29.9115	29.7874	29.724	29.717	29.6248	29.6028	29.5326	28.9243
31	29.9642	29.9115	29.7874	29.724	29.717	29.6248	29.6028	29.5326	28.8568
31	29.9642	29.9115	29.7874	29.724	29.717	29.6248	29.6028	29.5243	29.1852
31	29.9642	29.9115	29.7874	29.724	29.717	29.6248	29.6028	29.5243	29.1472
31	29.9642	29.9115	29.7874	29.724	29.717	29.6248	29.6028	29.5243	29.0483
31	29.9642	29.9115	29.7874	29.724	29.717	29.6248	29.6028	29.5243	28.9243
31	29.9642	29.9115	29.7874	29.724	29.717	29.6248	29.6028	29.5243	28.8568
31	29.9642	29.9115	29.7874	29.724	29.717	29.6248	29.6028	29.4468	29.306
31	29.9642	29.9115	29.7874	29.724	29.717	29.6248	29.6028	29.4468	29.1852
31	29.9642	29.9115	29.7874	29.724	29.717	29.6248	29.6028	29.4468	29.1472
31	29.9642	29.9115	29.7874	29.724	29.717	29.6248	29.6028	29.4468	29.0483
31	29.9642	29.9115	29.7874	29.724	29.717	29.6248	29.6028	29.4468	28.9243
31	29.9642	29.9115	29.7874	29.724	29.717	29.6248	29.6028	29.4122	29.3418
31	29.9642	29.9115	29.7874	29.724	29.717	29.6248	29.6028	29.4122	29.306
31	29.9642	29.9115	29.7874	29.724	29.717	29.6248	29.6028	29.4122	29.1852
31	29.9642	29.9115	29.7874	29.724	29.717	29.6248	29.6028	29.4122	29.1472
31	29.9642	29.9115	29.7874	29.724	29.717	29.6248	29.6028	29.4122	29.0483
31	29.9642	29.9115	29.7874	29.724	29.717	29.6248	29.6028	29.4122	28.9243
31	29.9642	29.9115	29.7874	29.724	29.717	29.6248	29.6028	29.3639	29.3591
31	29.9642	29.9115	29.7874	29.724	29.717	29.6248	29.6028	29.3639	29.3418
31	29.9642	29.9115	29.7874	29.724	29.717	29.6248	29.6028	29.3639	29.306
31	29.9642	29.9115	29.7874	29.724	29.717	29.6248	29.6028	29.3639	29.1852
31	29.9642	29.9115	29.7874	29.724	29.717	29.6248	29.6028	29.3639	29.1472
31	29.9642	29.9115	29.7874	29.724	29.717	29.6248	29.6028	29.3639	29.0483
31	29.9642	29.9115	29.7874	29.724	29.717	29.6248	29.6028	29.3591	29.3418
31	29.9642	29.9115	29.7874	29.724	29.717	29.6248	29.6028	29.3591	29.306
31	29.9642	29.9115	29.7874	29.724	29.717	29.6248	29.6028	29.3591	29.1852
31	29.9642	29.9115	29.7874	29.724	29.717	29.6248	29.6028	29.3591	29.1472
31	29.9642	29.9115	29.7874	29.724	29.717	29.6248	29.6028	29.3591	29.0483
31	29.9642	29.9115	29.7874	29.724	29.717	29.6248	29.6028	29.3418	29.306
31	29.9642	29.9115	29.7874	29.724	29.717	29.6248	29.6028	29.3418	29.1852
31	29.9642	29.9115	29.7874	29.724	29.717	29.6248	29.6028	29.3418	29.1472
31	29.9642	29.9115	29.7874	29.724	29.717	29.6248	29.6028	29.3418	29.0483
31	29.9642	29.9115	29.7874	29.724	29.717	29.6248	29.6028	29.306	29.1852
31	29.9642	29.9115	29.7874	29.724	29.717	29.6248	29.6028	29.306	29.1472
31	29.9642	29.9115	29.7874	29.724	29.717	29.6248	29.6028	29.306	29.0483
31	29.9642	29.9115	29.7874	29.724	29.717	29.6248	29.6028	29.1852	29.1472
31	29.9642	29.9115	29.7874	29.724	29.717	29.6248	29.5435	29.5424	29.1852
31	29.9642	29.9115	29.7874	29.724	29.717	29.6248	29.5435	29.5424	29.1472
31	29.9642	29.9115	29.7874	29.724	29.717	29.6248	29.5435	29.5424	29.0483
31	29.9642	29.9115	29.7874	29.724	29.717	29.6248	29.5435	29.5424	28.9243
31	29.9642	29.9115	29.7874	29.724	29.717	29.6248	29.5435	29.5424	28.8568
31	29.9642	29.9115	29.7874	29.724	29.717	29.6248	29.5435	29.5326	29.1852
31	29.9642	29.9115	29.7874	29.724	29.717	29.6248	29.5435	29.5326	29.1472
31	29.9642	29.9115	29.7874	29.724	29.717	29.6248	29.5435	29.5326	29.0483
31	29.9642	29.9115	29.7874	29.724	29.717	29.6248	29.5435	29.5326	28.9243
31	29.9642	29.9115	29.7874	29.724	29.717	29.6248	29.5435	29.5326	28.8568
31	29.9642	29.9115	29.7874	29.724	29.717	29.6248	29.5435	29.5243	29.1852
31	29.9642	29.9115	29.7874	29.724	29.717	29.6248	29.5435	29.5243	29.1472
31	29.9642	29.9115	29.7874	29.724	29.717	29.6248	29.5435	29.5243	29.0483
31	29.9642	29.9115	29.7874	29.724	29.717	29.6248	29.5435	29.5243	28.9243
31	29.9642	29.9115	29.7874	29.724	29.717	29.6248	29.5435	29.5243	28.8568
31	29.9642	29.9115	29.7874	29.724	29.717	29.6248	29.5435	29.4468	29.3639
31	29.9642	29.9115	29.7874	29.724	29.717	29.6248	29.5435	29.4468	29.3591
31	29.9642	29.9115	29.7874	29.724	29.717	29.6248	29.5435	29.4468	29.3418
31	29.9642	29.9115	29.7874	29.724	29.717	29.6248	29.5435	29.4468	29.306
31	29.9642	29.9115	29.7874	29.724	29.717	29.6248	29.5435	29.4468	29.1852
31	29.9642	29.9115	29.7874	29.724	29.717	29.6248	29.5435	29.4468	29.1472
31	29.9642	29.9115	29.7874	29.724	29.717	29.6248	29.5435	29.4468	29.0483
31	29.9642	29.9115	29.7874	29.724	29.717	29.6248	29.5435	29.4122	29.3639
31	29.9642	29.9115	29.7874	29.724	29.717	29.6248	29.5435	29.4122	29.3591
31	29.9642	29.9115	29.7874	29.724	29.717	29.6248	29.5435	29.4122	29.3418
31	29.9642	29.9115	29.7874	29.724	29.717	29.6248	29.5435	29.4122	29.306
31	29.9642	29.9115	29.7874	29.724	29.717	29.6248	29.5435	29.4122	29.1852
31	29.9642	29.9115	29.7874	29.724	29.717	29.6248	29.5435	29.4122	29.1472
31	29.9642	29.9115	29.7874	29.724	29.717	29.6248	29.5435	29.4122	29.0483
31	29.9642	29.9115	29.7874	29.724	29.717	29.6248	29.5435	29.3639	29.3591
31	29.9642	29.9115	29.7874	29.724	29.717	29.6248	29.5435	29.3639	29.3418
31	29.9642	29.9115	29.7874	29.724	29.717	29.6248	29.5435	29.3639	29.306
31	29.9642	29.9115	29.7874	29.724	29.717	29.6248	29.5435	29.3639	29.1852
31	29.9642	29.9115	29.7874	29.724	29.717	29.6248	29.5435	29.3639	29.1472
31	29.9642	29.9115	29.7874	29.724	29.717	29.6248	29.5435	29.3639	29.0483
31	29.9642	29.9115	29.7874	29.724	29.717	29.6248	29.5435	29.3591	29.3418
31	29.9642	29.9115	29.7874	29.724	29.717	29.6248	29.5435	29.3591	29.306
31	29.9642	29.9115	29.7874	29.724	29.717	29.6248	29.5435	29.3591	29.1852
31	29.9642	29.9115	29.7874	29.724	29.717	29.6248	29.5435	29.3591	29.1472
31	29.9642	29.9115	29.7874	29.724	29.717	29.6248	29.5435	29.3591	29.0483
31	29.9642	29.9115	29.7874	29.724	29.717	29.6248	29.5435	29.3418	29.306
31	29.9642	29.9115	29.7874	29.724	29.717	29.6248	29.5435	29.3418	29.1852
31	29.9642	29.9115	29.7874	29.724	29.717	29.6248	29.5435	29.3418	29.1472
31	29.9642	29.9115	29.7874	29.724	29.717	29.6248	29.5435	29.3418	29.0483
31	29.9642	29.9115	29.7874	29.724	29.717	29.6248	29.5435	29.306	29.1852
31	29.9642	29.9115	29.7874	29.724	29.717	29.6248	29.5435	29.306	29.1472
31	29.9642	29.9115	29.7874	29.724	29.717	29.6248	29.5424	29.5326	29.1852
31	29.9642	29.9115	29.7874	29.724	29.717	29.6248	29.5424	29.5326	29.1472
31	29.9642	29.9115	29.7874	29.724	29.717	29.6248	29.5424	29.5326	29.0483
31	29.9642	29.9115	29.7874	29.724	29.717	29.6248	29.5424	29.5326	28.9243
31	29.9642	29.9115	29.7874	29.724	29.717	29.6248	29.5424	29.5326	28.8568
31	29.9642	29.9115	29.7874	29.724	29.717	29.6248	29.5424	29.5243	29.1852
31	29.9642	29.9115	29.7874	29.724	29.717	29.6248	29.5424	29.5243	29.1472
31	29.9642	29.9115	29.7874	29.724	29.717	29.6248	29.5424	29.5243	29.0483
31	29.9642	29.9115	29.7874	29.724	29.717	29.6248	29.5424	29.5243	28.9243
31	29.9642	29.9115	29.7874	29.724	29.717	29.6248	29.5424	29.5243	28.8568
31	29.9642	29.9115	29.7874	29.724	29.717	29.6248	29.5424	29.4468	29.3639
31	29.9642	29.9115	29.7874	29.724	29.717	29.6248	29.5424	29.4468	29.3591
31	29.9642	29.9115	29.7874	29.724	29.717	29.6248	29.5424	29.4468	29.3418
31	29.9642	29.9115	29.7874	29.724	29.717	29.6248	29.5424	29.4468	29.306
31	29.9642	29.9115	29.7874	29.724	29.717	29.6248	29.5424	29.4468	29.1852
31	29.9642	29.9115	29.7874	29.724	29.717	29.6248	29.5424	29.4468	29.1472
31	29.9642	29.9115	29.7874	29.724	29.717	29.6248	29.5424	29.4468	29.0483
31	29.9642	29.9115	29.7874	29.724	29.717	29.6248	29.5424	29.4122	29.3639
31	29.9642	29.9115	29.7874	29.724	29.717	29.6248	29.5424	29.4122	29.3591
31	29.9642	29.9115	29.7874	29.724	29.717	29.6248	29.5424	29.4122	29.3418
31	29.9642	29.9115	29.7874	29.724	29.717	29.6248	29.5424	29.4122	29.306
31	29.9642	29.9115	29.7874	29.724	29.717	29.6248	29.5424	29.4122	29.1852
31	29.9642	29.9115	29.7874	29.724	29.717	29.6248	29.5424	29.4122	29.1472
31	29.9642	29.9115	29.7874	29.724	29.717	29.6248	29.5424	29.4122	29.0483
31	29.9642	29.9115	29.7874	29.724	29.717	29.6248	29.5424	29.3639	29.3591
31	29.9642	29.9115	29.7874	29.724	29.717	29.6248	29.5424	29.3639	29.3418
31	29.9642	29.9115	29.7874	29.724	29.717	29.6248	29.5424	29.3639	29.306
31	29.9642	29.9115	29.7874	29.724	29.717	29.6248	29.5424	29.3639	29.1852
31	29.9642	29.9115	29.7874	29.724	29.717	29.6248	29.5424	29.3639	29.1472
31	29.9642	29.9115	29.7874	29.724	29.717	29.6248	29.5424	29.3639	29.0483
31	29.9642	29.9115	29.7874	29.724	29.717	29.6248	29.5424	29.3591	29.3418
31	29.9642	29.9115	29.7874	29.724	29.717	29.6248	29.5424	29.3591	29.306
31	29.9642	29.9115	29.7874	29.724	29.717	29.6248	29.5424	29.3591	29.1852
31	29.9642	29.9115	29.7874	29.724	29.717	29.6248	29.5424	29.3591	29.1472
31	29.9642	29.9115	29.7874	29.724	29.717	29.6248	29.5424	29.3591	29.0483
31	29.9642	29.9115	29.7874	29.724	29.717	29.6248	29.5424	29.3418	29.306
31	29.9642	29.9115	29.7874	29.724	29.717	29.6248	29.5424	29.3418	29.1852
31	29.9642	29.9115	29.7874	29.724	29.717	29.6248	29.5424	29.3418	29.1472
31	29.9642	29.9115	29.7874	29.724	29.717	29.6248	29.5424	29.3418	29.0483
31	29.9642	29.9115	29.7874	29.724	29.717	29.6248	29.5424	29.306	29.1852
31	29.9642	29.9115	29.7874	29.724	29.717	29.6248	29.5424	29.306	29.1472
31	29.9642	29.9115	29.7874	29.724	29.717	29.6248	29.5326	29.5243	29.1852
31	29.9642	29.9115	29.7874	29.724	29.717	29.6248	29.5326	29.5243	29.1472
31	29.9642	29.9115	29.7874	29.724	29.717	29.6248	29.5326	29.5243	29.0483
31	29.9642	29.9115	29.7874	29.724	29.717	29.6248	29.5326	29.5243	28.9243
31	29.9642	29.9115	29.7874	29.724	29.717	29.6248	29.5326	29.4468	29.3639
31	29.9642	29.9115	29.7874	29.724	29.717	29.6248	29.5326	29.4468	29.3591
31	29.9642	29.9115	29.7874	29.724	29.717	29.6248	29.5326	29.4468	29.3418
31	29.9642	29.9115	29.7874	29.724	29.717	29.6248	29.5326	29.4468	29.306
31	29.9642	29.9115	29.7874	29.724	29.717	29.6248	29.5326	29.4468	29.1852
31	29.9642	29.9115	29.7874	29.724	29.717	29.6248	29.5326	29.4468	29.1472
31	29.9642	29.9115	29.7874	29.724	29.717	29.6248	29.5326	29.4468	29.0483
31	29.9642	29.9115	29.7874	29.724	29.717	29.6248	29.5326	29.4122	29.3639
31	29.9642	29.9115	29.7874	29.724	29.717	29.6248	29.5326	29.4122	29.3591
31	29.9642	29.9115	29.7874	29.724	29.717	29.6248	29.5326	29.4122	29.3418
31	29.9642	29.9115	29.7874	29.724	29.717	29.6248	29.5326	29.4122	29.306
31	29.9642	29.9115	29.7874	29.724	29.717	29.6248	29.5326	29.4122	29.1852
31	29.9642	29.9115	29.7874	29.724	29.717	29.6248	29.5326	29.4122	29.1472
31	29.9642	29.9115	29.7874	29.724	29.717	29.6248	29.5326	29.4122	29.0483
31	29.9642	29.9115	29.7874	29.724	29.717	29.6248	29.5326	29.3639	29.3591
31	29.9642	29.9115	29.7874	29.724	29.717	29.6248	29.5326	29.3639	29.3418
31	29.9642	29.9115	29.7874	29.724	29.717	29.6248	29.5326	29.3639	29.306
31	29.9642	29.9115	29.7874	29.724	29.717	29.6248	29.5326	29.3639	29.1852
31	29.9642	29.9115	29.7874	29.724	29.717	29.6248	29.5326	29.3639	29.1472
31	29.9642	29.9115	29.7874	29.724	29.717	29.6248	29.5326	29.3639	29.0483
31	29.9642	29.9115	29.7874	29.724	29.717	29.6248	29.5326	29.3591	29.3418
31	29.9642	29.9115	29.7874	29.724	29.717	29.6248	29.5326	29.3591	29.306
31	29.9642	29.9115	29.7874	29.724	29.717	29.6248	29.5326	29.3591	29.1852
31	29.9642	29.9115	29.7874	29.724	29.717	29.6248	29.5326	29.3591	29.1472
31	29.9642	29.9115	29.7874	29.724	29.717	29.6248	29.5326	29.3591	29.0483
31	29.9642	29.9115	29.7874	29.724	29.717	29.6248	29.5326	29.3418	29.306
31	29.9642	29.9115	29.7874	29.724	29.717	29.6248	29.5326	29.3418	29.1852
31	29.9642	29.9115	29.7874	29.724	29.717	29.6248	29.5326	29.3418	29.1472
31	29.9642	29.9115	29.7874	29.724	29.717	29.6248	29.5326	29.3418	29.0483
31	29.9642	29.9115	29.7874	29.724	29.717	29.6248	29.5326	29.306	29.1852
31	29.9642	29.9115	29.7874	29.724	29.717	29.6248	29.5326	29.306	29.1472
31	29.9642	29.9115	29.7874	29.724	29.717	29.6248	29.5243	29.4468	29.3639
31	29.9642	29.9115	29.7874	29.724	29.717	29.6248	29.5243	29.4468	29.3591
31	29.9642	29.9115	29.7874	29.724	29.717	29.6248	29.5243	29.4468	29.3418
31	29.9642	29.9115	29.7874	29.724	29.717	29.6248	29.5243	29.4468	29.306
31	29.9642	29.9115	29.7874	29.724	29.717	29.6248	29.5243	29.4468	29.1852
31	29.9642	29.9115	29.7874	29.724	29.717	29.6248	29.5243	29.4468	29.1472
31	29.9642	29.9115	29.7874	29.724	29.717	29.6248	29.5243	29.4468	29.0483
31	29.9642	29.9115	29.7874	29.724	29.717	29.6248	29.5243	29.4122	29.3639
31	29.9642	29.9115	29.7874	29.724	29.717	29.6248	29.5243	29.4122	29.3591
31	29.9642	29.9115	29.7874	29.724	29.717	29.6248	29.5243	29.4122	29.3418
31	29.9642	29.9115	29.7874	29.724	29.717	29.6248	29.5243	29.4122	29.306
31	29.9642	29.9115	29.7874	29.724	29.717	29.6248	29.5243	29.4122	29.1852
31	29.9642	29.9115	29.7874	29.724	29.717	29.6248	29.5243	29.4122	29.1472
31	29.9642	29.9115	29.7874	29.724	29.717	29.6248	29.5243	29.4122	29.0483
31	29.9642	29.9115	29.7874	29.724	29.717	29.6248	29.5243	29.3639	29.3591
31	29.9642	29.9115	29.7874	29.724	29.717	29.6248	29.5243	29.3639	29.3418
31	29.9642	29.9115	29.7874	29.724	29.717	29.6248	29.5243	29.3639	29.306
31	29.9642	29.9115	29.7874	29.724	29.717	29.6248	29.5243	29.3639	29.1852
31	29.9642	29.9115	29.7874	29.724	29.717	29.6248	29.5243	29.3639	29.1472
31	29.9642	29.9115	29.7874	29.724	29.717	29.6248	29.5243	29.3639	29.0483
31	29.9642	29.9115	29.7874	29.724	29.717	29.6248	29.5243	29.3591	29.3418
[truncated: 120,512 more rows]
